# Supplementary material
Source: PubMed Central journal article supplement (PMC3552494)
Supplement: NIHMS265554-supplement-Supp_Data.pdf [file NIHMS265554-supplement-Supp_Data.pdf]

## Supporting Information

# Association of OLE RNA with bacterial membranes via an RNA-protein interaction

**Kirsten F. Block<sup>1</sup>, Elena Puerta-Fernandez<sup>1,4</sup>, Jason G. Wallace<sup>1</sup>, and Ronald  
R. Breaker<sup>1,2,3\*</sup>**

<sup>1</sup>Department of Molecular, Cellular and Developmental Biology, Yale University, New Haven, Connecticut 06520, USA

<sup>2</sup>Department of Molecular Biophysics and Biochemistry, Yale University, New Haven, Connecticut 06520, USA

<sup>3</sup>Howard Hughes Medical Institute, Yale University, New Haven, Connecticut 06520, USA

<sup>4</sup>Current Address: Instituto de Bioquímica Vegetal y Fotosíntesis, Universidad de Sevilla. CSIC. Avda. Americo Vespucio, 49, 41092, Sevilla, Spain

Running title: OLE RNA Membrane Localization

\*Corresponding Author. Mailing address: KBT Room 506, Department of Molecular, Cellular and Developmental Biology, Yale University, P.O. Box 208103, New Haven, CT 06520-8103. Phone: (203) 432-9389. Fax: (203) 432-6161. E-mail: [ronald.breaker@yale.edu](mailto:ronald.breaker@yale.edu).

**Table S1.** *Bacillus halodurans* raw transcriptomics data. See the legend to Fig. 2 for additional information.

**Fig. S1.** SDS-PAGE monitoring of the purification of OAP from bacteria membranes. Membranes were isolated from *E. coli* cells expressing a histidine-tagged construct derived from *B. halodurans* OAP. OAP was extracted from membranes upon incubation with zwitterionic detergent LysoFos Choline 14 (solubilized protein, lane 1). The majority of OAP was observed to be solubilized by comparison with the proteins that could be pelleted after treatment with detergent (lane 2). Solubilized OAP was further purified by application to a nickel affinity column. Flow-through samples (lanes 3, 4) contained small amounts of OAP. Bound proteins were eluted from the nickel affinity matrix with buffer containing 10 mM imidazole (Elutions I and II, lanes 5 and 6), followed by elution in buffer containing 200 mM imidazole (Elution III, lane 7). The arrowhead points to OAP protein, which is only observed in extracts from cells that have been induced with IPTG. Protein from Elution III was used for *in vitro* binding assays.

**Fig. S2.** Denatured OAP does not bind OLE RNA. Trace amounts of internally <sup>32</sup>P-labeled OLE<sub>1-637</sub> was incubated with 50 nM or 500 nM OAP that was incubated on ice (–) or denatured by 20-minute incubation at 95°C (+) prior to incubation with RNA. RNA was prepared by *in vitro* transcription as described for other RNAs, but was subjected only to a G25 size-exclusion column to remove unincorporated nucleotides and other small molecules or ions prior to use.

**Table S2.** Binding characteristics of OLE-related constructs.

**Fig. S3.** Subcellular localization of exogenously expressed RNA controls. *E. coli* cells expressing (A) *E. coli* SRP RNA or (B) *B. halodurans* *ispA* were probed for cellular localization of the corresponding RNA as described in Figure 7. Fluorescence signal from the membrane stain (FM 4-64 FX, far left), nucleic acid (DAPI, second left), antisense RNA probe (Alexa 488, second right) and merge (far right) are shown. The scale bar in the lower right panel denotes 5 μm.

**Table S3.** Primers used in this project.

**Table S1**

| <b>Gene ID</b>            | <b>Reads</b> | <b>Length</b> | <b>RPKM</b> |
|---------------------------|--------------|---------------|-------------|
| BA000004.3 (whole genome) | 3989547      | 4202352       | —           |
| dnaA                      | 454          | 1350          | 84.29436    |
| dnaN                      | 643          | 1143          | 141.0071571 |
| BH0003                    | 607          | 222           | 685.3495483 |
| recF                      | 1693         | 1116          | 380.2499606 |
| BH0005                    | 555          | 270           | 515.2353276 |
| gyrB                      | 4554         | 1914          | 596.3860922 |
| gyrA                      | 8204         | 2502          | 821.8920139 |
| BH0008                    | 775          | 1083          | 179.3699389 |
| BH0009                    | 125          | 807           | 38.82512767 |
| BH0010                    | 525          | 420           | 313.3187803 |
| BH0011                    | 342          | 447           | 191.7763273 |
| BH0012                    | 640          | 1530          | 104.8491605 |
| BH0013                    | 378          | 753           | 125.8268249 |
| BH0014                    | 516          | 1494          | 86.5716148  |
| BH0015                    | 102          | 186           | 137.455981  |
| BH0016                    | 287          | 849           | 84.73261715 |
| BH0017                    | 813          | 2865          | 71.12828437 |
| BH0018                    | 349          | 1074          | 81.45121365 |
| rrnA-16S                  | 4362         | 1552          | 704.4827421 |
| rrnA-23S                  | 0            | 2939          | 0           |
| rrnA-5S                   | 22           | 116           | 47.53802184 |
| BH0019                    | 48           | 954           | 12.61157355 |
| guaB                      | 629          | 1458          | 108.1358095 |
| dacA                      | 2813         | 1335          | 528.1592383 |
| BH0022                    | 4648         | 897           | 1298.823359 |
| BH0023                    | 3093         | 591           | 1311.803706 |
| serS                      | 1361         | 1278          | 266.9338717 |
| BH0025                    | 150          | 903           | 41.63704722 |
| BH0026                    | 1027         | 1926          | 133.656651  |
| BH0027                    | 1208         | 1017          | 297.7298616 |
| BH0028                    | 1124         | 1044          | 269.8623058 |
| BH0029                    | 560          | 945           | 148.5363107 |
| BH0030                    | 438          | 906           | 121.1775945 |
| BH0031                    | 14893        | 1617          | 2308.599429 |
| trnA-Ser                  | 64           | 93            | 172.4937801 |
| BH0032                    | 35           | 132           | 66.46155946 |
| BH0033                    | 251          | 480           | 131.0716898 |

|          |        |      |             |
|----------|--------|------|-------------|
| scr      | 126985 | 272  | 117019.9568 |
| dnaX     | 1608   | 1695 | 237.7895451 |
| BH0035   | 821    | 312  | 659.5762016 |
| recR     | 1097   | 597  | 460.5838553 |
| BH0037   | 169    | 216  | 196.1143477 |
| bofA     | 282    | 276  | 256.1040465 |
| rrnB-16S | 9838   | 1552 | 1588.881526 |
| rrnB-23S | 0      | 2939 | 0           |
| rrnB-5S  | 0      | 116  | 0           |
| BH0039   | 0      | 1257 | 0           |
| csfB     | 11     | 201  | 13.71743914 |
| BH0041   | 570    | 1449 | 98.60135529 |
| tmk      | 372    | 633  | 147.3043744 |
| BH0043   | 136    | 330  | 103.3002524 |
| holB     | 631    | 987  | 160.2465251 |
| BH0045   | 561    | 828  | 169.8278606 |
| BH0046   | 369    | 351  | 263.509128  |
| BH0047   | 172    | 741  | 58.18173302 |
| BH0048   | 93     | 285  | 81.79269212 |
| BH0049   | 261    | 870  | 75.19650727 |
| abrB     | 309    | 291  | 266.1594587 |
| BH0051   | 118    | 954  | 31.00345164 |
| BH0052   | 462    | 1833 | 63.17655275 |
| metS     | 524    | 1983 | 66.23461054 |
| BH0054   | 187    | 711  | 65.92473915 |
| BH0055   | 3810   | 1251 | 763.3858052 |
| BH0056   | 372    | 558  | 167.1033495 |
| ksgA     | 843    | 870  | 242.8760752 |
| BH0058   | 87     | 876  | 24.8938209  |
| BH0059   | 6295   | 267  | 5909.638118 |
| sspF     | 439    | 186  | 591.5997615 |
| BH0061   | 841    | 864  | 243.9824947 |
| purR     | 967    | 849  | 285.492825  |
| BH0063   | 430    | 375  | 287.4177611 |
| spoVG    | 1812   | 294  | 1544.853415 |
| gcaD     | 1224   | 1368 | 224.2702848 |
| prs      | 792    | 951  | 208.7474019 |
| rply     | 782    | 648  | 302.4880077 |
| spoVC    | 309    | 558  | 138.8035887 |
| mfd      | 1209   | 3546 | 85.46021554 |
| spoVT    | 272    | 540  | 126.2558641 |

|           |      |      |             |
|-----------|------|------|-------------|
| BH0071    | 1269 | 1602 | 198.5525754 |
| BH0072    | 1537 | 1476 | 261.0140733 |
| BH0073    | 356  | 267  | 334.206699  |
| BH0074    | 202  | 312  | 162.2830606 |
| BH0075    | 225  | 597  | 94.46797396 |
| divIC     | 505  | 381  | 332.2330374 |
| BH0077    | 1430 | 414  | 865.7890934 |
| trnB-Met  | 1469 | 74   | 4975.840954 |
| spoIIE    | 349  | 2493 | 35.08969252 |
| BH0079    | 70   | 741  | 23.67861228 |
| BH0080    | 72   | 984  | 18.34061153 |
| BH0081    | 147  | 756  | 48.73847694 |
| BH0082    | 69   | 453  | 38.1792421  |
| BH0083    | 897  | 1389 | 161.8700912 |
| hprT      | 497  | 540  | 230.6954575 |
| ftsH      | 5603 | 1974 | 711.4590176 |
| BH0086    | 317  | 765  | 103.8661996 |
| BH0087    | 693  | 876  | 198.2921596 |
| cysK      | 308  | 924  | 83.55167475 |
| BH0089    | 0    | 1218 | 0           |
| pabB      | 726  | 1461 | 124.5554741 |
| pabA      | 489  | 597  | 205.3103967 |
| pabC      | 360  | 888  | 101.6169017 |
| sul       | 320  | 843  | 95.14781466 |
| folA      | 160  | 345  | 116.2458083 |
| folK      | 227  | 525  | 108.3784581 |
| BH0096    | 166  | 222  | 187.4267298 |
| BH0097    | 1765 | 1005 | 440.2050923 |
| lysS      | 6215 | 1506 | 1034.409678 |
| rrnC-16S  | 0    | 1552 | 0           |
| trnC-Ile  | 36   | 77   | 117.189362  |
| trnC-Ala  | 29   | 76   | 95.6446803  |
| rrnC-23S  | 0    | 2939 | 0           |
| rrnC-5S   | 56   | 116  | 121.0058738 |
| trnD-Val  | 66   | 76   | 217.6741    |
| trnD-Thr  | 156  | 73   | 535.6463532 |
| trnD-Lys  | 405  | 76   | 1335.727432 |
| trnD-Leu1 | 610  | 86   | 1777.901916 |
| trnD-Gly  | 498  | 75   | 1664.349361 |
| trnD-Leu2 | 1068 | 89   | 3007.860291 |
| trnD-Arg  | 308  | 77   | 1002.620097 |

|          |       |      |             |
|----------|-------|------|-------------|
| trnD-Pro | 225   | 77   | 732.4335124 |
| trnD-Ala | 176   | 76   | 580.4642667 |
| rrnD-16S | 0     | 1553 | 0           |
| rrnD-23S | 0     | 2939 | 0           |
| rrnD-5S  | 0     | 116  | 0           |
| BH0099   | 0     | 1257 | 0           |
| ctsR     | 207   | 471  | 110.1604884 |
| BH0101   | 339   | 534  | 159.1236952 |
| BH0102   | 660   | 1071 | 154.465281  |
| clpC     | 2215  | 2442 | 227.3549872 |
| BH0104   | 538   | 1374 | 98.14585374 |
| BH0105   | 402   | 1074 | 93.82059567 |
| BH0106   | 818   | 1089 | 188.2789806 |
| BH0107   | 789   | 687  | 287.8701807 |
| BH0108   | 599   | 474  | 316.7560327 |
| gltX     | 2100  | 1458 | 361.0257551 |
| cysE     | 230   | 690  | 83.55167475 |
| cysS     | 489   | 1401 | 87.48772795 |
| BH0112   | 286   | 420  | 170.6841356 |
| BH0113   | 419   | 750  | 140.0326069 |
| BH0114   | 226   | 513  | 110.4250204 |
| sigH     | 845   | 654  | 323.8585558 |
| rpmG     | 3463  | 150  | 5786.788993 |
| secE     | 1430  | 195  | 1838.136844 |
| nusG     | 3311  | 537  | 1545.472598 |
| rplK     | 23206 | 426  | 13654.22651 |
| rplA     | 14620 | 696  | 5265.196055 |
| rplJ     | 16955 | 498  | 8533.847261 |
| rplL     | 9721  | 366  | 6657.424838 |
| BH0123   | 0     | 1218 | 0           |
| BH0124   | 436   | 606  | 180.3392584 |
| BH0125   | 263   | 114  | 578.2655384 |
| rpoB     | 23610 | 3543 | 1670.326029 |
| rpoC     | 24398 | 3621 | 1688.892925 |
| BH0128   | 8132  | 249  | 8186.050832 |
| rpsL     | 17885 | 420  | 10673.72645 |
| rpsG     | 12686 | 471  | 6751.18819  |
| fus      | 78663 | 2079 | 9484.019323 |
| tufA     | 83508 | 1191 | 17574.89485 |
| rpsJ     | 4643  | 309  | 3766.314814 |
| rplC     | 17997 | 630  | 7160.378526 |

|        |       |      |             |
|--------|-------|------|-------------|
| rplD   | 18110 | 624  | 7274.619373 |
| rplW   | 7591  | 291  | 6538.564567 |
| rplB   | 25762 | 831  | 7770.607382 |
| rpsS   | 10091 | 279  | 9065.805913 |
| rplV   | 12217 | 342  | 8953.954477 |
| rpsC   | 11629 | 660  | 4416.465571 |
| rplP   | 6395  | 435  | 3684.916966 |
| rpmC   | 4695  | 204  | 5768.751661 |
| rpsQ   | 3811  | 261  | 3659.9475   |
| rplN   | 10169 | 369  | 6907.617728 |
| rplX   | 7604  | 312  | 6108.912834 |
| rplE   | 6271  | 540  | 2910.847513 |
| rpsN   | 5498  | 186  | 7409.146899 |
| rpsH   | 7145  | 399  | 4488.546737 |
| rplF   | 14080 | 537  | 6572.109388 |
| rplR   | 16551 | 363  | 11428.62619 |
| rpsE   | 13194 | 501  | 6601.082614 |
| rpmD   | 7457  | 189  | 9889.600613 |
| rplO   | 10151 | 441  | 5769.612587 |
| secY   | 26652 | 1293 | 5166.633957 |
| adk    | 11910 | 654  | 4564.680946 |
| map    | 20987 | 747  | 7042.16465  |
| BH0157 | 3762  | 309  | 3051.664082 |
| infA   | 2679  | 219  | 3066.232009 |
| rpmJ   | 3215  | 114  | 7068.911429 |
| rpsM   | 8442  | 366  | 5781.501953 |
| rpsK   | 11425 | 390  | 7342.9068   |
| rpoA   | 18124 | 945  | 4807.271597 |
| rplQ   | 14544 | 363  | 10042.7732  |
| BH0164 | 1376  | 837  | 412.0684747 |
| BH0165 | 1214  | 849  | 358.4160182 |
| BH0166 | 1001  | 798  | 314.4181444 |
| truA   | 1251  | 792  | 395.9210042 |
| rplM   | 2899  | 438  | 1659.015788 |
| rpsI   | 2135  | 393  | 1361.700959 |
| BH0170 | 186   | 828  | 56.30656342 |
| BH0171 | 173   | 702  | 61.77110996 |
| BH0172 | 205   | 744  | 69.06489243 |
| BH0173 | 1     | 240  | 1.044395934 |
| BH0174 | 12    | 2064 | 1.457296653 |
| BH0175 | 15    | 408  | 9.215258244 |

|        |     |      |             |
|--------|-----|------|-------------|
| BH0176 | 0   | 471  | 0           |
| BH0177 | 18  | 819  | 5.508901632 |
| BH0178 | 17  | 786  | 5.421291873 |
| BH0179 | 69  | 663  | 26.08626949 |
| BH0180 | 136 | 180  | 189.3837961 |
| BH0181 | 74  | 726  | 25.54885922 |
| BH0182 | 50  | 186  | 67.38038286 |
| licH   | 582 | 1329 | 109.767663  |
| BH0184 | 64  | 1149 | 13.96163756 |
| BH0185 | 66  | 1347 | 12.28153794 |
| BH0186 | 44  | 525  | 21.00727822 |
| gutB   | 5   | 1065 | 1.176784151 |
| BH0188 | 0   | 321  | 0           |
| BH0189 | 1   | 1032 | 0.242882775 |
| gatC   | 2   | 1260 | 0.397865118 |
| gatB   | 3   | 285  | 2.638473939 |
| gatA   | 2   | 483  | 1.037909003 |
| BH0193 | 6   | 2052 | 0.732909428 |
| phaN   | 44  | 897  | 12.29522973 |
| phaE   | 12  | 1338 | 2.248027123 |
| phaF   | 8   | 984  | 2.037845726 |
| BH0197 | 3   | 360  | 2.088791869 |
| phaG   | 7   | 816  | 2.150226924 |
| phaH   | 4   | 507  | 1.977554432 |
| BH0200 | 7   | 324  | 5.415386326 |
| BH0201 | 5   | 774  | 1.619218503 |
| BH0202 | 4   | 783  | 1.280485437 |
| gbsA   | 11  | 1473 | 1.87182978  |
| hbd    | 7   | 849  | 2.066649199 |
| BH0205 | 20  | 1203 | 4.167165823 |
| BH0206 | 2   | 426  | 1.176784151 |
| BH0207 | 3   | 780  | 0.964057786 |
| BH0208 | 2   | 1380 | 0.363268151 |
| BH0209 | 0   | 249  | 0           |
| BH0210 | 14  | 948  | 3.701656476 |
| BH0211 | 30  | 528  | 14.24176274 |
| BH0212 | 7   | 441  | 3.978651178 |
| BH0213 | 2   | 1104 | 0.454085189 |
| BH0214 | 5   | 987  | 1.269782291 |
| BH0215 | 5   | 1245 | 1.006646684 |
| BH0216 | 13  | 1422 | 2.291501628 |



|          |       |      |             |
|----------|-------|------|-------------|
| BH0217   | 47    | 1374 | 8.57408016  |
| pdh      | 81    | 1140 | 17.80969909 |
| BH0219   | 98    | 1650 | 14.88738932 |
| BH0220   | 34    | 2106 | 4.04666231  |
| BH0221   | 6     | 444  | 3.387230057 |
| BH0222   | 0     | 270  | 0           |
| BH0223   | 24    | 1299 | 4.631039709 |
| BH0224   | 14    | 1257 | 2.791702736 |
| BH0225   | 69    | 996  | 17.36465529 |
| BH0226   | 49    | 750  | 16.37612825 |
| BH0227   | 56    | 753  | 18.6410111  |
| BH0228   | 8     | 312  | 6.427051904 |
| BH0229   | 18    | 471  | 9.579172901 |
| BH0230   | 52    | 720  | 18.10286286 |
| fnr      | 41    | 714  | 14.39335573 |
| BH0232   | 13    | 612  | 5.32437143  |
| BH0233   | 13    | 159  | 20.49380701 |
| BH0234   | 5     | 198  | 6.329672329 |
| BH0235   | 11    | 198  | 13.92527912 |
| BH0236   | 16    | 3063 | 1.309330848 |
| BH0237   | 242   | 1164 | 52.11212703 |
| BH0238   | 4     | 438  | 2.289086979 |
| cwID     | 9     | 717  | 3.146297375 |
| BH0240   | 691   | 1053 | 164.4849209 |
| gerD     | 10    | 639  | 3.922613838 |
| kbaA     | 141   | 585  | 60.41428789 |
| BH0243   | 11    | 762  | 3.618379615 |
| BH0244   | 3     | 234  | 3.213525952 |
| rrnE-16S | 793   | 1552 | 128.0730891 |
| rrnE-23S | 13065 | 2939 | 1114.259235 |
| rrnE-5S  | 55    | 116  | 118.8450546 |
| trnE-Asn | 79    | 75   | 264.0232922 |
| trnE-Thr | 558   | 73   | 1915.965802 |
| BH0245   | 10    | 1326 | 1.890309383 |
| BH0246   | 19    | 315  | 15.11887448 |
| BH0247   | 12    | 693  | 4.34034674  |
| BH0248   | 4     | 804  | 1.247039922 |
| BH0249   | 3     | 1104 | 0.681127783 |
| BH0250   | 2     | 894  | 0.560749495 |
| BH0251   | 1     | 1260 | 0.198932559 |
| ureA     | 4     | 303  | 3.308977218 |

|          |      |      |             |
|----------|------|------|-------------|
| ureB     | 3    | 375  | 2.005240194 |
| ureC     | 9    | 1716 | 1.314624253 |
| ureE     | 4    | 447  | 2.24299798  |
| ureF     | 7    | 756  | 2.320879854 |
| ureG     | 10   | 627  | 3.997687787 |
| ureD     | 22   | 816  | 6.757856046 |
| BH0259   | 13   | 999  | 3.261777092 |
| BH0260   | 16   | 111  | 36.13045394 |
| BH0261   | 306  | 228  | 336.4054273 |
| trnF-Glu | 49   | 75   | 163.7612825 |
| trnF-Val | 89   | 76   | 293.5302258 |
| trnF-Thr | 149  | 73   | 511.6109399 |
| trnF-Tyr | 120  | 85   | 353.8659166 |
| trnF-Gln | 265  | 75   | 885.6477523 |
| trnF-Lys | 25   | 76   | 82.45231061 |
| trnF-Gly | 32   | 75   | 106.9461437 |
| trnF-Ala | 25   | 76   | 82.45231061 |
| BH0262   | 4    | 159  | 6.305786773 |
| sigW     | 392  | 564  | 174.2141303 |
| BH0264   | 438  | 642  | 171.0076334 |
| BH0265   | 538  | 825  | 163.4574582 |
| BH0266   | 2295 | 1257 | 457.6398414 |
| BH0267   | 3301 | 1344 | 615.6341034 |
| glmS     | 2012 | 1803 | 279.7104319 |
| BH0269   | 0    | 471  | 0           |
| BH0270   | 1    | 1326 | 0.189030938 |
| BH0271   | 8    | 693  | 2.893564493 |
| BH0272   | 30   | 996  | 7.549850128 |
| BH0273   | 2    | 762  | 0.657887203 |
| BH0274   | 0    | 222  | 0           |
| BH0275   | 0    | 1356 | 0           |
| BH0276   | 20   | 1626 | 3.083087629 |
| BH0277   | 19   | 516  | 9.229545466 |
| BH0278   | 47   | 189  | 62.3322018  |
| BH0279   | 37   | 366  | 25.33944234 |
| BH0280   | 137  | 2142 | 16.03162387 |
| BH0281   | 48   | 642  | 18.74056256 |
| BH0282   | 74   | 288  | 64.40441595 |
| BH0283   | 54   | 798  | 16.96161818 |
| BH0284   | 98   | 1074 | 22.8716875  |
| BH0285   | 5    | 540  | 2.320879854 |

|        |     |      |             |
|--------|-----|------|-------------|
| BH0286 | 7   | 780  | 2.249468166 |
| BH0287 | 37  | 2169 | 4.275811847 |
| BH0288 | 47  | 678  | 17.37579077 |
| BH0289 | 32  | 1041 | 7.705053579 |
| BH0290 | 2   | 906  | 0.553322349 |
| BH0291 | 10  | 783  | 3.201213592 |
| BH0292 | 31  | 534  | 14.55113437 |
| BH0293 | 17  | 1257 | 3.389924751 |
| BH0294 | 42  | 504  | 20.88791869 |
| BH0295 | 29  | 588  | 12.36223759 |
| BH0296 | 5   | 1893 | 0.662057645 |
| licT   | 4   | 834  | 1.20218237  |
| BH0298 | 7   | 168  | 10.44395934 |
| BH0299 | 105 | 918  | 28.66969232 |
| BH0300 | 18  | 297  | 15.19121359 |
| BH0301 | 140 | 990  | 35.44616504 |
| BH0302 | 7   | 168  | 10.44395934 |
| BH0303 | 15  | 555  | 6.774460115 |
| BH0304 | 4   | 366  | 2.739399172 |
| BH0305 | 94  | 855  | 27.55739448 |
| BH0306 | 579 | 432  | 335.9473589 |
| BH0307 | 20  | 213  | 23.53568303 |
| BH0308 | 68  | 546  | 31.21710925 |
| BH0309 | 10  | 1017 | 2.464651172 |
| BH0310 | 5   | 291  | 4.306787358 |
| BH0311 | 0   | 1173 | 0           |
| BH0312 | 5   | 273  | 4.59075136  |
| BH0313 | 34  | 837  | 10.18192452 |
| BH0314 | 0   | 138  | 0           |
| BH0315 | 31  | 714  | 10.88278116 |
| BH0316 | 37  | 939  | 9.876715545 |
| BH0317 | 21  | 573  | 9.186309789 |
| BH0318 | 5   | 456  | 2.748410354 |
| BH0319 | 3   | 327  | 2.299587378 |
| BH0320 | 36  | 618  | 14.60126355 |
| BH0321 | 11  | 285  | 9.674404444 |
| aadK   | 58  | 879  | 16.53923937 |
| BH0323 | 143 | 558  | 64.23596499 |
| BH0324 | 121 | 552  | 54.94430785 |
| BH0325 | 6   | 573  | 2.62465994  |
| BH0326 | 26  | 750  | 8.689374174 |

|        |      |      |             |
|--------|------|------|-------------|
| BH0327 | 439  | 1377 | 79.9110789  |
| BH0328 | 1260 | 1815 | 174.0084466 |
| BH0329 | 1218 | 1272 | 240.0140091 |
| BH0330 | 1042 | 912  | 286.3843588 |
| BH0331 | 607  | 378  | 402.5068776 |
| BH0332 | 657  | 747  | 220.4556237 |
| BH0333 | 135  | 846  | 39.99814217 |
| BH0334 | 0    | 285  | 0           |
| BH0335 | 0    | 786  | 0           |
| BH0336 | 758  | 2403 | 79.06637885 |
| BH0337 | 686  | 711  | 241.8415564 |
| BH0338 | 2128 | 1884 | 283.1177769 |
| BH0339 | 941  | 852  | 276.8384716 |
| BH0340 | 622  | 525  | 296.966524  |
| BH0341 | 1030 | 1032 | 250.1692587 |
| BH0342 | 195  | 291  | 167.964707  |
| BH0343 | 34   | 645  | 13.21282298 |
| BH0344 | 498  | 84   | 1486.026215 |
| BH0345 | 127  | 351  | 90.69284353 |
| BH0346 | 1    | 279  | 0.898405105 |
| appA   | 3    | 1551 | 0.484825966 |
| appB   | 1    | 918  | 0.273044689 |
| appC   | 2    | 918  | 0.546089377 |
| appD   | 13   | 990  | 3.291429611 |
| appF   | 32   | 999  | 8.028989766 |
| BH0352 | 69   | 1125 | 15.37350815 |
| BH0353 | 25   | 594  | 10.54945388 |
| BH0354 | 22   | 255  | 21.62513935 |
| BH0355 | 115  | 741  | 38.90057731 |
| BH0356 | 1    | 1173 | 0.213687148 |
| BH0357 | 2    | 525  | 0.954876283 |
| atoE   | 14   | 1326 | 2.646433137 |
| BH0359 | 2    | 747  | 0.671097789 |
| cah    | 53   | 828  | 16.04434334 |
| BH0361 | 335  | 4986 | 16.84104154 |
| BH0362 | 5    | 564  | 2.222119009 |
| BH0363 | 156  | 975  | 40.10480388 |
| BH0364 | 13   | 201  | 16.21151898 |
| BH0365 | 11   | 459  | 6.006983152 |
| BH0366 | 63   | 936  | 16.87101125 |
| BH0367 | 42   | 390  | 26.993618   |

|        |     |      |             |
|--------|-----|------|-------------|
| BH0368 | 45  | 534  | 21.1226144  |
| BH0369 | 16  | 450  | 8.91217864  |
| BH0370 | 170 | 519  | 82.10280177 |
| BH0371 | 80  | 1599 | 12.54058908 |
| BH0372 | 56  | 669  | 20.98158648 |
| BH0373 | 136 | 1380 | 24.70223427 |
| BH0374 | 65  | 519  | 31.39224774 |
| BH0375 | 126 | 585  | 53.98723599 |
| BH0376 | 39  | 1716 | 5.696705096 |
| BH0377 | 171 | 342  | 125.3275121 |
| BH0378 | 320 | 672  | 119.3595354 |
| BH0379 | 0   | 1218 | 0           |
| BH0380 | 167 | 855  | 48.95834976 |
| mphB   | 198 | 903  | 54.96090233 |
| BH0382 | 105 | 693  | 37.97803398 |
| BH0383 | 46  | 381  | 30.26281133 |
| BH0384 | 40  | 774  | 12.95374802 |
| BH0385 | 1   | 72   | 3.481319781 |
| BH0386 | 48  | 885  | 13.59484877 |
| BH0387 | 0   | 1173 | 0           |
| BH0388 | 12  | 498  | 6.039880102 |
| BH0389 | 29  | 975  | 7.455380208 |
| BH0390 | 18  | 936  | 4.820288928 |
| BH0391 | 25  | 705  | 8.888476037 |
| BH0392 | 10  | 609  | 4.115846047 |
| adaB   | 8   | 507  | 3.955108864 |
| adaA   | 105 | 546  | 48.20288928 |
| BH0395 | 56  | 717  | 19.57696145 |
| BH0396 | 39  | 918  | 10.64874286 |
| BH0397 | 305 | 1599 | 47.81099587 |
| BH0398 | 131 | 714  | 45.98852686 |
| BH0399 | 40  | 1194 | 8.397153241 |
| BH0400 | 13  | 1320 | 2.468572208 |
| BH0401 | 29  | 900  | 8.076661892 |
| BH0402 | 21  | 501  | 10.50649802 |
| BH0403 | 10  | 198  | 12.65934466 |
| BH0404 | 3   | 261  | 2.881092233 |
| BH0405 | 87  | 669  | 32.59639329 |
| BH0406 | 10  | 525  | 4.774381414 |
| BH0407 | 17  | 687  | 6.202526073 |
| mta    | 183 | 768  | 59.7263925  |

|        |      |      |             |
|--------|------|------|-------------|
| BH0409 | 145  | 426  | 85.31685097 |
| BH0410 | 54   | 909  | 14.89039748 |
| BH0411 | 38   | 996  | 9.563143495 |
| paiB   | 21   | 630  | 8.355167475 |
| BH0413 | 7    | 2877 | 0.609866239 |
| BH0414 | 545  | 1461 | 93.50238755 |
| BH0415 | 147  | 414  | 89.00069701 |
| BH0416 | 0    | 1218 | 0           |
| BH0417 | 95   | 930  | 25.60454549 |
| BH0418 | 31   | 612  | 12.69657803 |
| BH0419 | 131  | 723  | 45.41605557 |
| nagB   | 146  | 741  | 49.38681989 |
| nagA   | 200  | 1194 | 41.9857662  |
| BH0422 | 73   | 1368 | 13.37559705 |
| BH0423 | 2    | 435  | 1.152436893 |
| BH0424 | 17   | 417  | 10.21855015 |
| BH0425 | 737  | 372  | 496.5934217 |
| BH0426 | 112  | 498  | 56.37221429 |
| BH0427 | 2690 | 906  | 744.2185598 |
| BH0428 | 1852 | 558  | 831.9231271 |
| BH0429 | 24   | 624  | 9.640577855 |
| BH0430 | 76   | 672  | 28.34788965 |
| BH0431 | 128  | 603  | 53.20703666 |
| BH0432 | 252  | 1449 | 43.59217813 |
| BH0433 | 111  | 498  | 55.86889095 |
| BH0434 | 0    | 1284 | 0           |
| BH0435 | 11   | 378  | 7.294193827 |
| BH0436 | 35   | 417  | 21.03819148 |
| BH0437 | 35   | 180  | 48.73847694 |
| BH0438 | 321  | 2271 | 35.429442   |
| BH0439 | 6    | 954  | 1.576446693 |
| BH0440 | 2    | 774  | 0.647687401 |
| BH0441 | 1    | 792  | 0.316483616 |
| BH0442 | 1    | 804  | 0.31175998  |
| BH0443 | 6    | 537  | 2.800614796 |
| BH0444 | 8    | 306  | 6.553072529 |
| BH0445 | 30   | 921  | 8.16465877  |
| BH0446 | 24   | 711  | 8.460929088 |
| BH0447 | 22   | 744  | 7.411842115 |
| BH0448 | 59   | 924  | 16.0050286  |
| BH0449 | 36   | 717  | 12.5851895  |

|        |      |      |             |
|--------|------|------|-------------|
| BH0450 | 60   | 759  | 19.81462642 |
| BH0451 | 45   | 2175 | 5.185966019 |
| BH0452 | 21   | 2973 | 1.770519848 |
| BH0453 | 146  | 198  | 184.826432  |
| BH0454 | 350  | 210  | 417.7583737 |
| BH0455 | 1423 | 3180 | 112.1641822 |
| BH0456 | 56   | 81   | 173.2923624 |
| BH0457 | 11   | 375  | 7.352547378 |
| BH0458 | 2    | 207  | 2.421787674 |
| BH0459 | 46   | 294  | 39.21813304 |
| BH0460 | 96   | 225  | 106.9461437 |
| BH0461 | 246  | 372  | 165.7557418 |
| BH0462 | 45   | 324  | 34.81319781 |
| BH0463 | 216  | 1119 | 48.38381165 |
| BH0464 | 142  | 825  | 43.1430466  |
| BH0465 | 146  | 957  | 38.23995145 |
| BH0466 | 80   | 504  | 39.78651178 |
| BH0467 | 134  | 669  | 50.20593909 |
| BH0468 | 1    | 972  | 0.257875539 |
| BH0469 | 3    | 744  | 1.010705743 |
| BH0470 | 6    | 867  | 1.734636846 |
| BH0471 | 2    | 291  | 1.722714943 |
| BH0472 | 139  | 1254 | 27.78393012 |
| BH0473 | 103  | 675  | 38.2481     |
| BH0474 | 999  | 720  | 347.7838461 |
| BH0475 | 22   | 825  | 6.68413398  |
| BH0476 | 235  | 870  | 67.70566747 |
| BH0477 | 126  | 345  | 91.54357407 |
| BH0478 | 114  | 474  | 60.28411975 |
| BH0479 | 97   | 495  | 49.11825728 |
| BH0480 | 129  | 438  | 73.82305509 |
| BH0481 | 0    | 882  | 0           |
| BH0482 | 12   | 1539 | 1.95442514  |
| BH0483 | 6    | 2310 | 0.651052011 |
| BH0484 | 0    | 978  | 0           |
| BH0485 | 1    | 1098 | 0.228283264 |
| BH0486 | 33   | 480  | 17.23253292 |
| BH0487 | 102  | 1293 | 19.77325017 |
| BH0488 | 41   | 651  | 15.78626113 |
| BH0489 | 43   | 978  | 11.02061968 |
| BH0490 | 41   | 1494 | 6.878752339 |

|        |      |      |             |
|--------|------|------|-------------|
| BH0491 | 34   | 1083 | 7.869132802 |
| BH0492 | 42   | 1539 | 6.840487991 |
| BH0493 | 57   | 1284 | 11.12720902 |
| pelX   | 27   | 4131 | 1.638268132 |
| BH0495 | 20   | 1125 | 4.45608932  |
| kdgF   | 5    | 327  | 3.832645631 |
| BH0497 | 50   | 744  | 16.84509572 |
| BH0498 | 4    | 150  | 6.68413398  |
| BH0499 | 179  | 657  | 68.29109488 |
| aroI   | 164  | 552  | 74.46997097 |
| nrdA   | 3686 | 2181 | 423.6196329 |
| nrdB   | 2215 | 1038 | 534.8756057 |
| BH0503 | 19   | 525  | 9.071324687 |
| BH0504 | 15   | 390  | 9.640577855 |
| BH0505 | 672  | 1320 | 127.6061942 |
| BH0506 | 236  | 783  | 75.54864077 |
| BH0507 | 153  | 252  | 152.1834076 |
| BH0508 | 174  | 309  | 141.1455476 |
| BH0509 | 19   | 147  | 32.39758817 |
| BH0510 | 20   | 102  | 49.14804397 |
| BH0511 | 237  | 1359 | 43.7124656  |
| BH0512 | 671  | 1050 | 160.1804964 |
| BH0513 | 1089 | 1119 | 243.9350504 |
| BH0514 | 1114 | 1662 | 168.0082413 |
| BH0515 | 8    | 318  | 6.305786773 |
| psaA   | 7119 | 903  | 1976.094261 |
| BH0517 | 137  | 747  | 45.97019856 |
| BH0518 | 49   | 360  | 34.11693386 |
| BH0519 | 200  | 1005 | 49.88159686 |
| BH0520 | 204  | 1167 | 43.81630244 |
| BH0521 | 1100 | 288  | 957.3629398 |
| BH0522 | 907  | 351  | 647.7040085 |
| rsbR   | 51   | 816  | 15.66593902 |
| rsbS   | 40   | 357  | 28.08459655 |
| rsbT   | 48   | 420  | 28.64628848 |
| rsbU   | 151  | 1014 | 37.3263399  |
| rsbV   | 56   | 333  | 42.15219627 |
| rsbW   | 122  | 489  | 62.53560932 |
| sigB   | 226  | 786  | 72.07129196 |
| rsbX   | 127  | 621  | 51.26117243 |
| BH0531 | 809  | 2187 | 92.72058281 |



|           |      |      |             |
|-----------|------|------|-------------|
| BH0532    | 55   | 456  | 30.23251389 |
| trnG-Asn  | 518  | 75   | 1731.190701 |
| trnG-Ser  | 2893 | 91   | 7968.62621  |
| trnG-Glu  | 74   | 75   | 247.3129573 |
| trnG-Val  | 222  | 76   | 732.1765182 |
| trnG-Asp  | 202  | 77   | 657.5625311 |
| trnG-Leu1 | 200  | 83   | 603.9880102 |
| trnG-Leu2 | 1639 | 84   | 4890.756961 |
| trnG-Arg  | 215  | 77   | 699.8809118 |
| trnG-Pro  | 188  | 77   | 611.9888904 |
| trnG-Gly  | 527  | 74   | 1785.07024  |
| trnG-Ile  | 45   | 77   | 146.4867025 |
| rrnF-16S  | 0    | 1552 | 0           |
| rrnF-23S  | 0    | 2939 | 0           |
| rrnF-5S   | 0    | 116  | 0           |
| BH0533    | 0    | 1257 | 0           |
| BH0534    | 23   | 1149 | 5.017463497 |
| BH0535    | 0    | 120  | 0           |
| cckA      | 25   | 1509 | 4.152667731 |
| BH0537    | 54   | 1452 | 9.321881067 |
| BH0538    | 1    | 597  | 0.419857662 |
| dhaS      | 5    | 1497 | 0.83719113  |
| BH0540    | 1    | 75   | 3.34206699  |
| BH0541    | 14   | 720  | 4.873847694 |
| BH0542    | 143  | 1146 | 31.27719761 |
| BH0543    | 106  | 159  | 167.1033495 |
| rrnI-5S   | 1109 | 116  | 2396.348465 |
| trnH-Met  | 40   | 74   | 135.4892023 |
| BH0544    | 249  | 987  | 63.23515809 |
| BH0545    | 121  | 474  | 63.98577623 |
| BH0546    | 443  | 711  | 156.1746494 |
| BH0547    | 176  | 456  | 96.74404444 |
| BH0548    | 685  | 1032 | 166.3747012 |
| BH0549    | 50   | 2157 | 5.810269454 |
| BH0550    | 686  | 1929 | 89.13911178 |
| BH0551    | 148  | 636  | 58.32852765 |
| BH0552    | 228  | 198  | 288.6330582 |
| BH0553    | 275  | 762  | 90.45949038 |
| BH0554    | 388  | 1425 | 68.2485259  |
| BH0555    | 66   | 1143 | 14.47351846 |
| BH0556    | 111  | 204  | 136.385822  |

|        |       |      |             |
|--------|-------|------|-------------|
| BH0557 | 650   | 2421 | 67.29688796 |
| BH0558 | 260   | 303  | 215.0835192 |
| BH0559 | 45    | 198  | 56.96705096 |
| BH0560 | 176   | 714  | 61.78611242 |
| groES  | 1410  | 285  | 1240.082752 |
| groEL  | 10426 | 1635 | 1598.366534 |
| BH0563 | 1078  | 369  | 732.2658974 |
| BH0564 | 1771  | 711  | 624.346059  |
| BH0565 | 3904  | 1206 | 811.407309  |
| BH0566 | 557   | 1644 | 84.92387379 |
| nikA   | 413   | 1620 | 63.90155865 |
| nikB   | 193   | 945  | 51.1919785  |
| nikC   | 121   | 834  | 36.36601671 |
| BH0570 | 240   | 831  | 72.39134274 |
| BH0571 | 116   | 816  | 35.63233188 |
| BH0572 | 18    | 120  | 37.59825364 |
| BH0573 | 166   | 885  | 47.01551867 |
| chrA   | 87    | 1194 | 18.2638083  |
| BH0575 | 8     | 309  | 6.489450466 |
| BH0576 | 3     | 177  | 4.248390241 |
| BH0577 | 3     | 555  | 1.354892023 |
| BH0578 | 76    | 1410 | 13.51048358 |
| BH0579 | 234   | 1362 | 43.06407905 |
| BH0580 | 169   | 582  | 72.78470635 |
| BH0581 | 122   | 606  | 50.46190257 |
| BH0582 | 104   | 1125 | 23.17166446 |
| BH0583 | 34    | 1176 | 7.246828932 |
| BH0584 | 205   | 105  | 489.3740949 |
| BH0585 | 154   | 549  | 70.31124542 |
| BH0586 | 99    | 921  | 26.94337394 |
| BH0587 | 3     | 348  | 2.160819175 |
| BH0588 | 4     | 360  | 2.785055825 |
| BH0589 | 4     | 1290 | 0.777224881 |
| BH0590 | 23    | 2040 | 2.826012528 |
| BH0591 | 21    | 1161 | 4.533811808 |
| BH0592 | 30    | 1194 | 6.297864931 |
| BH0593 | 18    | 636  | 7.09401012  |
| BH0594 | 41    | 846  | 12.14758392 |
| bglP   | 8     | 1911 | 1.049314597 |
| gblH   | 10    | 1434 | 1.747942986 |
| BH0597 | 133   | 657  | 50.74142804 |

|          |      |      |             |
|----------|------|------|-------------|
| BH0598   | 304  | 1347 | 56.56950807 |
| BH0599   | 39   | 684  | 14.29173384 |
| BH0600   | 126  | 2472 | 12.7761056  |
| BH0601   | 35   | 1041 | 8.427402352 |
| BH0602   | 25   | 1959 | 3.198762433 |
| BH0603   | 14   | 1725 | 2.034301646 |
| BH0604   | 170  | 957  | 44.52597087 |
| BH0605   | 197  | 1158 | 42.64165784 |
| BH0606   | 300  | 2190 | 34.33630469 |
| guaA     | 1303 | 1542 | 211.805121  |
| BH0608   | 365  | 1305 | 70.10657766 |
| BH0609   | 421  | 1824 | 57.85403794 |
| BH0610   | 488  | 1719 | 71.15744725 |
| rrnG-16S | 0    | 1552 | 0           |
| trnI-Ile | 132  | 77   | 429.6943273 |
| trnI-Ala | 20   | 76   | 65.96184848 |
| rrnG-23S | 3027 | 2939 | 258.1601764 |
| rrnG-5S  | 5811 | 116  | 12556.52022 |
| BH0611   | 0    | 1257 | 0           |
| BH0612   | 1    | 1524 | 0.164471801 |
| nasD     | 20   | 2424 | 2.068110761 |
| nasE     | 8    | 324  | 6.189012944 |
| nasC     | 79   | 2232 | 8.87175041  |
| BH0616   | 231  | 645  | 89.7694738  |
| bcsA     | 31   | 1098 | 7.076781194 |
| BH0618   | 13   | 561  | 5.808405196 |
| BH0619   | 37   | 951  | 9.75208822  |
| sigV     | 25   | 534  | 11.73478578 |
| BH0621   | 46   | 540  | 21.35209466 |
| BH0622   | 24   | 198  | 30.38242718 |
| purE     | 62   | 486  | 31.97656688 |
| purK     | 206  | 1140 | 45.29380263 |
| purB     | 372  | 1302 | 71.61572121 |
| purC     | 102  | 714  | 35.80786061 |
| BH0627   | 30   | 255  | 29.48882638 |
| purL     | 97   | 684  | 35.54610724 |
| purQ     | 335  | 2232 | 37.62071376 |
| purF     | 177  | 1422 | 31.19967601 |
| purM     | 139  | 1038 | 33.5655572  |
| purN     | 65   | 567  | 28.73470296 |
| purH     | 175  | 1536 | 28.55770133 |

|        |      |      |             |
|--------|------|------|-------------|
| purD   | 261  | 1287 | 50.83213778 |
| BH0635 | 18   | 117  | 38.56231142 |
| BH0636 | 3    | 279  | 2.695215314 |
| BH0637 | 226  | 1746 | 32.44446476 |
| BH0638 | 2954 | 1059 | 699.1831366 |
| BH0639 | 388  | 303  | 320.9707901 |
| adeC   | 451  | 1758 | 64.30342203 |
| BH0641 | 791  | 549  | 361.1441242 |
| BH0642 | 152  | 216  | 176.3868689 |
| BH0643 | 488  | 321  | 381.0581054 |
| BH0644 | 12   | 339  | 8.872744221 |
| BH0645 | 15   | 411  | 9.147993585 |
| BH0646 | 36   | 954  | 9.45868016  |
| BH0647 | 196  | 690  | 71.20055761 |
| pcrA   | 806  | 2244 | 90.03028054 |
| lig    | 1083 | 2010 | 135.0544235 |
| BH0650 | 733  | 1179 | 155.8355664 |
| BH0651 | 14   | 372  | 9.433253601 |
| BH0652 | 43   | 867  | 12.43156406 |
| BH0653 | 23   | 606  | 9.513309501 |
| BH0654 | 28   | 915  | 7.670317682 |
| BH0655 | 1    | 342  | 0.732909428 |
| BH0656 | 257  | 399  | 161.4494768 |
| BH0657 | 14   | 918  | 3.822625642 |
| BH0658 | 8    | 699  | 2.86872703  |
| BH0659 | 24   | 102  | 58.97765276 |
| BH0660 | 220  | 1506 | 36.6162718  |
| BH0661 | 113  | 1116 | 25.37994421 |
| BH0662 | 49   | 132  | 93.04618324 |
| BH0663 | 43   | 1275 | 8.453463563 |
| BH0664 | 22   | 612  | 9.010474728 |
| BH0665 | 713  | 291  | 614.1478773 |
| BH0666 | 3455 | 1458 | 593.9733256 |
| BH0667 | 4856 | 1431 | 850.5805714 |
| BH0668 | 8    | 1218 | 1.646338419 |
| BH0669 | 0    | 219  | 0           |
| BH0670 | 282  | 480  | 147.2598267 |
| BH0671 | 152  | 1275 | 29.88201073 |
| BH0672 | 40   | 858  | 11.68554892 |
| BH0673 | 21   | 1359 | 3.873256445 |
| BH0674 | 22   | 1257 | 4.386961443 |

|        |     |      |             |
|--------|-----|------|-------------|
| BH0675 | 5   | 2061 | 0.608090791 |
| BH0676 | 164 | 888  | 46.29214412 |
| BH0677 | 65  | 570  | 28.58346768 |
| BH0678 | 386 | 741  | 130.5706334 |
| BH0679 | 4   | 474  | 2.115232272 |
| BH0680 | 95  | 357  | 66.70091682 |
| aldA   | 162 | 1521 | 26.69698483 |
| BH0682 | 69  | 1569 | 11.0230699  |
| lplA   | 124 | 993  | 31.30032528 |
| alp    | 13  | 1119 | 2.911988664 |
| BH0685 | 57  | 315  | 45.35662343 |
| BH0686 | 35  | 345  | 25.42877058 |
| BH0687 | 548 | 1377 | 99.75232628 |
| BH0688 | 0   | 285  | 0           |
| BH0689 | 0   | 786  | 0           |
| BH0690 | 0   | 879  | 0           |
| BH0691 | 19  | 1116 | 4.267424248 |
| BH0692 | 0   | 279  | 0           |
| BH0693 | 19  | 771  | 6.176972063 |
| BH0694 | 68  | 330  | 51.65012621 |
| BH0695 | 77  | 510  | 37.84399386 |
| apr    | 61  | 2379 | 6.427051904 |
| BH0697 | 9   | 699  | 3.227317909 |
| BH0698 | 7   | 1038 | 1.690351801 |
| BH0699 | 79  | 573  | 34.55802254 |
| BH0700 | 116 | 1167 | 24.91515237 |
| BH0701 | 7   | 1026 | 1.710121998 |
| BH0702 | 1   | 534  | 0.469391431 |
| BH0703 | 5   | 1305 | 0.960364078 |
| BH0704 | 30  | 2406 | 3.125374367 |
| BH0705 | 29  | 1419 | 5.122618536 |
| BH0706 | 17  | 1038 | 4.105140089 |
| BH0707 | 20  | 855  | 5.863275421 |
| BH0708 | 26  | 1110 | 5.871198766 |
| BH0709 | 3   | 729  | 1.031502157 |
| BH0710 | 8   | 1167 | 1.71828637  |
| BH0711 | 14  | 792  | 4.430770631 |
| BH0712 | 28  | 924  | 7.595606795 |
| BH0713 | 366 | 1737 | 52.81504829 |
| BH0714 | 258 | 2463 | 26.25619012 |
| BH0715 | 41  | 1437 | 7.151604728 |

|        |      |      |             |
|--------|------|------|-------------|
| BH0716 | 9    | 414  | 5.449022266 |
| BH0717 | 5    | 306  | 4.095670331 |
| BH0718 | 7    | 231  | 7.595606795 |
| BH0719 | 31   | 567  | 13.70424295 |
| BH0720 | 41   | 2064 | 4.979096896 |
| BH0721 | 54   | 1800 | 7.519650727 |
| BH0722 | 57   | 249  | 57.37886097 |
| BH0723 | 6    | 444  | 3.387230057 |
| BH0724 | 20   | 897  | 5.588740786 |
| BH0725 | 36   | 939  | 9.609777287 |
| BH0726 | 199  | 1017 | 49.04655833 |
| BH0727 | 2326 | 1353 | 430.9117416 |
| BH0728 | 116  | 948  | 30.67086795 |
| BH0729 | 163  | 639  | 63.93860556 |
| BH0730 | 391  | 1122 | 87.34947814 |
| BH0731 | 324  | 927  | 87.60758129 |
| BH0732 | 724  | 1374 | 132.0773199 |
| BH0733 | 704  | 1068 | 165.2257838 |
| BH0734 | 190  | 801  | 59.45624795 |
| BH0735 | 533  | 282  | 473.7557728 |
| BH0736 | 166  | 540  | 77.05321116 |
| BH0737 | 113  | 357  | 79.33898526 |
| BH0738 | 42   | 1020 | 10.32108923 |
| BH0739 | 394  | 1695 | 58.26435372 |
| BH0740 | 130  | 474  | 68.74504884 |
| BH0741 | 22   | 126  | 43.76516296 |
| BH0742 | 1    | 195  | 1.285410381 |
| BH0743 | 5    | 318  | 3.941116733 |
| BH0744 | 60   | 1914 | 7.857524271 |
| BH0745 | 25   | 1329 | 4.715105798 |
| BH0746 | 18   | 1338 | 3.372040685 |
| BH0747 | 2    | 918  | 0.546089377 |
| BH0748 | 18   | 2283 | 1.976255119 |
| BH0749 | 9    | 504  | 4.475982576 |
| BH0750 | 21   | 972  | 5.415386326 |
| BH0751 | 19   | 630  | 7.559437239 |
| BH0752 | 48   | 1929 | 6.237139017 |
| BH0753 | 21   | 783  | 6.722548543 |
| BH0754 | 26   | 1062 | 6.136563682 |
| BH0755 | 13   | 699  | 4.661681424 |
| BH0756 | 7    | 1233 | 1.423021224 |

|        |     |      |             |
|--------|-----|------|-------------|
| BH0757 | 10  | 1674 | 1.497341841 |
| BH0758 | 1   | 534  | 0.469391431 |
| BH0759 | 3   | 990  | 0.75956068  |
| BH0760 | 0   | 360  | 0           |
| BH0761 | 19  | 1245 | 3.825257398 |
| BH0762 | 30  | 1251 | 6.010911852 |
| BH0763 | 13  | 783  | 4.161577669 |
| BH0764 | 682 | 999  | 171.1178444 |
| BH0765 | 57  | 948  | 15.07102994 |
| BH0766 | 8   | 333  | 6.021742324 |
| BH0767 | 0   | 1227 | 0           |
| BH0768 | 5   | 702  | 1.785292195 |
| BH0769 | 3   | 936  | 0.803381488 |
| BH0770 | 1   | 387  | 0.647687401 |
| BH0771 | 0   | 549  | 0           |
| BH0772 | 4   | 1008 | 0.994662795 |
| BH0773 | 0   | 378  | 0           |
| BH0774 | 3   | 1320 | 0.56967051  |
| BH0775 | 1   | 342  | 0.732909428 |
| BH0776 | 0   | 981  | 0           |
| BH0777 | 3   | 984  | 0.764192147 |
| BH0778 | 1   | 1311 | 0.191193764 |
| BH0779 | 22  | 1389 | 3.970057979 |
| BH0780 | 535 | 951  | 141.0099243 |
| BH0781 | 64  | 759  | 21.13560152 |
| BH0782 | 32  | 1356 | 5.915162814 |
| BH0783 | 21  | 729  | 7.220515102 |
| BH0784 | 146 | 1182 | 30.96077288 |
| BH0785 | 15  | 2637 | 1.425796497 |
| BH0786 | 4   | 909  | 1.102992406 |
| BH0787 | 1   | 615  | 0.407569145 |
| BH0788 | 1   | 474  | 0.528808068 |
| BH0789 | 11  | 2334 | 1.181321879 |
| BH0790 | 9   | 1365 | 1.65267049  |
| BH0791 | 166 | 3120 | 13.3361327  |
| BH0792 | 10  | 1764 | 1.420946849 |
| BH0793 | 12  | 1527 | 1.96978408  |
| BH0794 | 1   | 939  | 0.266938258 |
| BH0795 | 0   | 969  | 0           |
| BH0796 | 23  | 1503 | 3.835705627 |
| BH0797 | 159 | 882  | 45.18610981 |

|        |     |      |             |
|--------|-----|------|-------------|
| BH0798 | 78  | 474  | 41.24702931 |
| BH0799 | 35  | 1182 | 7.422103087 |
| BH0800 | 0   | 900  | 0           |
| BH0801 | 152 | 780  | 48.84559447 |
| BH0802 | 148 | 759  | 48.87607851 |
| BH0803 | 66  | 447  | 37.00946667 |
| pdxA   | 221 | 1005 | 55.11916453 |
| gntP   | 20  | 1371 | 3.656528435 |
| BH0806 | 5   | 327  | 3.832645631 |
| BH0807 | 20  | 1254 | 3.997687787 |
| BH0808 | 28  | 678  | 10.35153492 |
| BH0809 | 21  | 414  | 12.71438529 |
| BH0810 | 10  | 792  | 3.164836165 |
| BH0811 | 14  | 459  | 7.645251284 |
| BH0812 | 25  | 513  | 12.21515713 |
| BH0813 | 165 | 1065 | 38.833877   |
| BH0814 | 151 | 633  | 59.79290468 |
| BH0815 | 386 | 1836 | 52.69762492 |
| BH0816 | 92  | 342  | 67.42766734 |
| BH0817 | 70  | 693  | 25.31868932 |
| BH0818 | 55  | 945  | 14.58838765 |
| BH0819 | 69  | 930  | 18.59698567 |
| BH0820 | 45  | 705  | 15.99925687 |
| BH0821 | 1   | 708  | 0.35403252  |
| BH0822 | 0   | 1320 | 0           |
| BH0823 | 151 | 1101 | 34.3768471  |
| BH0824 | 272 | 1395 | 48.8732377  |
| BH0825 | 100 | 534  | 46.93914312 |
| BH0826 | 11  | 756  | 3.647096914 |
| fruB   | 83  | 921  | 22.58888926 |
| fruA   | 45  | 1878 | 6.006110805 |
| BH0829 | 2   | 402  | 1.247039922 |
| BH0830 | 195 | 561  | 87.12607795 |
| vpr    | 255 | 2400 | 26.63209633 |
| BH0832 | 113 | 702  | 40.34760362 |
| BH0833 | 89  | 453  | 49.24568909 |
| BH0834 | 99  | 1686 | 14.71817758 |
| BH0835 | 56  | 930  | 15.09320576 |
| BH0836 | 222 | 717  | 77.60866859 |
| BH0837 | 157 | 594  | 66.25057038 |
| BH0838 | 1   | 45   | 5.57011165  |



|        |      |      |             |
|--------|------|------|-------------|
| BH0839 | 41   | 852  | 12.06203755 |
| BH0840 | 99   | 321  | 77.30482056 |
| BH0841 | 88   | 333  | 66.23916557 |
| BH0842 | 82   | 2388 | 8.607082072 |
| BH0843 | 28   | 1008 | 6.962639562 |
| BH0844 | 1824 | 2028 | 225.4412052 |
| BH0845 | 583  | 831  | 175.8506367 |
| BH0846 | 281  | 879  | 80.12976315 |
| BH0847 | 152  | 780  | 48.84559447 |
| BH0848 | 31   | 540  | 14.3894551  |
| BH0849 | 14   | 369  | 9.509946719 |
| BH0850 | 12   | 447  | 6.728993939 |
| BH0851 | 35   | 786  | 11.16148327 |
| BH0852 | 109  | 405  | 67.46024109 |
| BH0853 | 178  | 684  | 65.22893906 |
| BH0854 | 270  | 321  | 210.8313288 |
| BH0855 | 24   | 1086 | 5.539337552 |
| BH0856 | 1    | 114  | 2.198728283 |
| BH0857 | 72   | 849  | 21.25696319 |
| BH0858 | 45   | 972  | 11.60439927 |
| BH0859 | 11   | 372  | 7.411842115 |
| BH0860 | 117  | 1377 | 21.29748572 |
| BH0861 | 26   | 264  | 24.68572208 |
| BH0862 | 0    | 138  | 0           |
| BH0863 | 186  | 591  | 78.88635281 |
| BH0864 | 100  | 651  | 38.50307592 |
| BH0865 | 273  | 1359 | 50.35233379 |
| BH0866 | 8    | 1542 | 1.300415171 |
| BH0867 | 51   | 1620 | 7.890991504 |
| BH0868 | 70   | 450  | 38.99078155 |
| BH0869 | 22   | 585  | 9.426342792 |
| BH0870 | 12   | 543  | 5.539337552 |
| BH0871 | 189  | 1770 | 26.76485852 |
| treA   | 4348 | 1680 | 648.7190746 |
| treR   | 1226 | 714  | 430.3964422 |
| BH0874 | 96   | 1335 | 18.02463096 |
| BH0875 | 320  | 1008 | 79.57302357 |
| BH0876 | 4007 | 1683 | 596.7764006 |
| BH0877 | 404  | 1041 | 97.27630143 |
| BH0878 | 527  | 1332 | 99.1705689  |
| BH0879 | 307  | 858  | 89.68658793 |

|        |      |      |             |
|--------|------|------|-------------|
| BH0880 | 5    | 147  | 8.525681097 |
| BH0881 | 12   | 147  | 20.46163463 |
| BH0882 | 121  | 954  | 31.79167498 |
| BH0883 | 279  | 378  | 185.0072798 |
| BH0884 | 147  | 1206 | 30.55247808 |
| BH0885 | 72   | 381  | 47.3678786  |
| BH0886 | 45   | 1365 | 8.263352448 |
| BH0887 | 43   | 804  | 13.40567916 |
| BH0888 | 13   | 807  | 4.037813278 |
| BH0889 | 184  | 1125 | 40.99602174 |
| BH0890 | 4    | 609  | 1.646338419 |
| BH0891 | 22   | 600  | 9.190684222 |
| BH0892 | 17   | 798  | 5.339768687 |
| BH0893 | 18   | 474  | 9.518545224 |
| BH0894 | 1481 | 1539 | 241.2086361 |
| BH0895 | 87   | 795  | 27.43017246 |
| BH0896 | 23   | 363  | 15.8817233  |
| BH0897 | 1066 | 1392 | 191.95277   |
| BH0898 | 95   | 405  | 58.79562297 |
| BH0899 | 54   | 633  | 21.38289306 |
| BH0900 | 3    | 861  | 0.873362454 |
| BH0901 | 10   | 990  | 2.531868932 |
| araP   | 0    | 951  | 0           |
| araQ   | 2    | 840  | 0.596797677 |
| BH0904 | 2    | 621  | 0.807262558 |
| araN   | 45   | 1338 | 8.430101712 |
| BH0906 | 1578 | 2208 | 179.136607  |
| BH0907 | 23   | 714  | 8.074321509 |
| BH0908 | 207  | 246  | 210.9170326 |
| BH0909 | 4    | 297  | 3.375825242 |
| BH0910 | 7    | 333  | 5.269024534 |
| BH0911 | 1    | 444  | 0.564538343 |
| BH0912 | 5    | 1326 | 0.945154692 |
| BH0913 | 53   | 714  | 18.60604522 |
| BH0914 | 50   | 747  | 16.77744473 |
| BH0915 | 0    | 1173 | 0           |
| BH0916 | 34   | 1800 | 4.734594902 |
| BH0917 | 41   | 297  | 34.60220873 |
| ectC   | 1061 | 390  | 681.910207  |
| BH0919 | 1370 | 1284 | 267.4434449 |
| BH0920 | 443  | 570  | 194.8073259 |

|          |       |      |             |
|----------|-------|------|-------------|
| BH0921   | 3     | 138  | 5.449022266 |
| BH0922   | 2     | 117  | 4.284701269 |
| BH0923   | 5     | 555  | 2.258153372 |
| BH0924   | 138   | 801  | 43.18401167 |
| BH0925   | 56    | 327  | 42.92563106 |
| BH0926   | 33    | 156  | 53.02317821 |
| BH0927   | 36    | 144  | 62.66375606 |
| BH0928   | 80    | 267  | 75.10262899 |
| BH0929   | 195   | 984  | 49.67248956 |
| BH0930   | 29    | 324  | 22.43517192 |
| BH0931   | 229   | 1119 | 51.29580031 |
| BH0932   | 210   | 759  | 69.35119248 |
| BH0933   | 34    | 411  | 20.73545213 |
| BH0934   | 352   | 336  | 262.5909778 |
| BH0935   | 683   | 969  | 176.6742844 |
| BH0936   | 625   | 1158 | 135.2844475 |
| BH0937   | 1     | 222  | 1.129076686 |
| BH0938   | 503   | 750  | 168.1059696 |
| sspE     | 137   | 207  | 165.8924557 |
| BH0940   | 844   | 528  | 400.6682584 |
| BH0941   | 849   | 1755 | 121.2570459 |
| BH0942   | 135   | 1083 | 31.24508612 |
| gsaB     | 210   | 1314 | 40.05902214 |
| BH0944   | 24    | 324  | 18.56703883 |
| BH0945   | 24    | 300  | 20.05240194 |
| BH0946   | 38    | 594  | 16.0351699  |
| BH0947   | 20    | 426  | 11.76784151 |
| BH0948   | 274   | 465  | 147.6977992 |
| BH0949   | 556   | 951  | 146.5448932 |
| BH0950   | 116   | 297  | 97.89893203 |
| BH0951   | 825   | 438  | 472.1241895 |
| BH0952   | 190   | 366  | 130.1214607 |
| BH0953   | 52    | 885  | 14.72775284 |
| rrnH-16S | 2744  | 1553 | 442.8830564 |
| rrnH-23S | 0     | 2939 | 0           |
| rrnH-5S  | 28700 | 116  | 62015.51031 |
| trnJ-Asn | 405   | 75   | 1353.537131 |
| trnJ-Ser | 1165  | 94   | 3106.522375 |
| trnJ-Glu | 85    | 72   | 295.9121814 |
| trnJ-Val | 49    | 76   | 161.6065288 |
| trnJ-Met | 179   | 77   | 582.6915499 |

|          |      |      |             |
|----------|------|------|-------------|
| trnJ-Asp | 158  | 77   | 514.3310887 |
| trnJ-Phe | 137  | 76   | 451.8386621 |
| trnJ-Thr | 214  | 76   | 705.7917788 |
| trnJ-Tyr | 197  | 85   | 580.9298797 |
| trnJ-Trp | 2453 | 74   | 8308.875331 |
| trnJ-His | 927  | 76   | 3057.331677 |
| trnJ-Gln | 247  | 75   | 825.4905465 |
| trnJ-Gly | 195  | 75   | 651.703063  |
| trnJ-Cys | 612  | 71   | 2160.575702 |
| trnJ-Leu | 409  | 89   | 1151.886572 |
| trnJ-Arg | 89   | 77   | 289.7181449 |
| BH0954   | 0    | 1215 | 0           |
| BH0955   | 0    | 486  | 0           |
| BH0956   | 1    | 471  | 0.532176272 |
| BH0957   | 2    | 453  | 1.106644699 |
| BH0958   | 0    | 366  | 0           |
| BH0959   | 0    | 240  | 0           |
| BH0960   | 4    | 1755 | 0.571293503 |
| BH0961   | 4    | 705  | 1.422156166 |
| BH0962   | 11   | 3981 | 0.692591125 |
| BH0963   | 1    | 411  | 0.609866239 |
| BH0964   | 0    | 378  | 0           |
| BH0965   | 1    | 408  | 0.61435055  |
| BH0966   | 7    | 1017 | 1.725255821 |
| BH0967   | 2    | 237  | 2.115232272 |
| trnK-Leu | 1215 | 86   | 3541.230866 |
| BH0968   | 10   | 1476 | 1.698204771 |
| BH0969   | 12   | 1734 | 1.734636846 |
| BH0970   | 916  | 468  | 490.5982953 |
| BH0971   | 2188 | 3042 | 180.2870457 |
| BH0972   | 5000 | 291  | 4306.787358 |
| BH0973   | 106  | 243  | 109.3392287 |
| BH0974   | 259  | 1323 | 49.0700312  |
| BH0975   | 1504 | 4470 | 84.33672404 |
| BH0976   | 272  | 417  | 163.4968024 |
| BH0977   | 122  | 261  | 117.1644175 |
| BH0978   | 706  | 1512 | 117.0386555 |
| BH0979   | 17   | 642  | 6.637282573 |
| BH0980   | 19   | 309  | 15.41244486 |
| BH0981   | 0    | 1356 | 0           |
| BH0982   | 2937 | 1386 | 531.1499323 |

|        |      |      |             |
|--------|------|------|-------------|
| BH0983 | 1631 | 474  | 862.4859589 |
| BH0984 | 1128 | 372  | 760.0507187 |
| BH0985 | 366  | 234  | 392.0501661 |
| BH0986 | 1439 | 627  | 575.2672725 |
| BH0987 | 15   | 612  | 6.143505496 |
| BH0988 | 35   | 600  | 14.62154308 |
| BH0989 | 47   | 837  | 14.07501331 |
| BH0990 | 14   | 984  | 3.56623002  |
| BH0991 | 2    | 1332 | 0.376358895 |
| BH0992 | 49   | 1365 | 8.997872665 |
| BH0993 | 0    | 1284 | 0           |
| BH0994 | 6    | 1188 | 1.265934466 |
| BH0995 | 9    | 1407 | 1.603337042 |
| BH0996 | 22   | 147  | 37.51299683 |
| BH0997 | 122  | 681  | 44.90442431 |
| BH0998 | 14   | 900  | 3.899078155 |
| BH0999 | 25   | 468  | 13.38969147 |
| BH1000 | 98   | 453  | 54.22559023 |
| BH1001 | 853  | 1347 | 158.7295736 |
| BH1002 | 20   | 606  | 8.272443044 |
| BH1003 | 59   | 918  | 16.10963663 |
| BH1004 | 131  | 1605 | 20.45844746 |
| BH1005 | 2119 | 1458 | 364.2921786 |
| BH1006 | 1493 | 867  | 431.6354685 |
| htpG   | 743  | 1878 | 99.16756284 |
| BH1008 | 60   | 954  | 15.76446693 |
| BH1009 | 6    | 348  | 4.321638349 |
| BH1010 | 34   | 609  | 13.99387656 |
| BH1011 | 295  | 894  | 82.7105505  |
| BH1012 | 93   | 783  | 29.7712864  |
| BH1013 | 27   | 468  | 14.46086678 |
| BH1014 | 24   | 537  | 11.20245918 |
| BH1015 | 292  | 3414 | 21.43856681 |
| BH1016 | 12   | 1611 | 1.867076531 |
| BH1017 | 0    | 609  | 0           |
| dps    | 110  | 441  | 62.52166138 |
| BH1019 | 38   | 675  | 14.11094951 |
| BH1020 | 153  | 1176 | 32.61073019 |
| dat    | 200  | 528  | 94.94508494 |
| BH1022 | 21   | 897  | 5.868177825 |
| cspR   | 57   | 474  | 30.14205988 |

|        |     |      |             |
|--------|-----|------|-------------|
| BH1024 | 312 | 90   | 868.9374174 |
| BH1025 | 22  | 954  | 5.780304542 |
| BH1026 | 21  | 948  | 5.552484714 |
| BH1027 | 15  | 759  | 4.953656606 |
| BH1028 | 75  | 990  | 18.98901699 |
| prkA   | 11  | 1896 | 1.454222187 |
| sipV   | 208 | 549  | 94.96583796 |
| BH1031 | 25  | 1167 | 5.369644907 |
| BH1032 | 2   | 45   | 11.1402233  |
| BH1033 | 29  | 879  | 8.269619685 |
| BH1034 | 2   | 594  | 0.843956311 |
| BH1035 | 16  | 1305 | 3.073165048 |
| BH1036 | 10  | 777  | 3.225933388 |
| BH1037 | 130 | 1026 | 31.75940853 |
| BH1038 | 177 | 1950 | 22.75176374 |
| BH1039 | 115 | 816  | 35.3251566  |
| BH1040 | 96  | 798  | 30.15398788 |
| BH1041 | 43  | 480  | 22.45451259 |
| BH1042 | 59  | 732  | 20.20306889 |
| BH1043 | 10  | 114  | 21.98728283 |
| BH1044 | 23  | 324  | 17.79341221 |
| BH1045 | 166 | 606  | 68.66127727 |
| BH1046 | 226 | 603  | 93.94367409 |
| BH1047 | 187 | 816  | 57.44177639 |
| BH1048 | 246 | 735  | 83.89270199 |
| BH1049 | 1   | 1218 | 0.205792302 |
| BH1050 | 89  | 1116 | 19.98951358 |
| BH1051 | 47  | 639  | 18.43628504 |
| BH1052 | 41  | 435  | 23.62495631 |
| BH1053 | 67  | 549  | 30.58995742 |
| BH1054 | 98  | 2706 | 9.077676414 |
| BH1055 | 82  | 1272 | 16.15857861 |
| BH1056 | 65  | 1107 | 14.71777468 |
| BH1057 | 20  | 441  | 11.3675748  |
| hmp    | 12  | 1236 | 2.433543925 |
| argE   | 14  | 1272 | 2.758781713 |
| BH1060 | 9   | 1188 | 1.898901699 |
| BH1061 | 264 | 2049 | 32.29523006 |
| BH1062 | 153 | 681  | 56.31456492 |
| BH1063 | 34  | 1086 | 7.847394866 |
| BH1064 | 6   | 1653 | 0.9098186   |

|        |      |      |             |
|--------|------|------|-------------|
| BH1065 | 2    | 954  | 0.525482231 |
| BH1066 | 4    | 882  | 1.13675748  |
| BH1067 | 3    | 846  | 0.888847604 |
| BH1068 | 12   | 1509 | 1.993280511 |
| BH1069 | 20   | 897  | 5.588740786 |
| BH1070 | 144  | 1062 | 33.98712193 |
| BH1071 | 112  | 621  | 45.20670324 |
| BH1072 | 255  | 1212 | 52.73682441 |
| BH1073 | 151  | 456  | 83.00199268 |
| BH1074 | 0    | 813  | 0           |
| BH1075 | 0    | 606  | 0           |
| BH1076 | 8    | 1137 | 1.763623741 |
| BH1077 | 6    | 948  | 1.586424204 |
| BH1078 | 4    | 813  | 1.233235052 |
| BH1079 | 1    | 1380 | 0.181634076 |
| BH1080 | 30   | 753  | 9.986255946 |
| fhuC   | 55   | 825  | 16.71033495 |
| fhuG   | 47   | 1005 | 11.72217526 |
| fhuB   | 35   | 1017 | 8.626279104 |
| glgP   | 6    | 2448 | 0.61435055  |
| glgA   | 9    | 1431 | 1.576446693 |
| glgD   | 2    | 1107 | 0.452854606 |
| glgC   | 1    | 1152 | 0.217582486 |
| BH1088 | 233  | 459  | 127.2388249 |
| BH1089 | 389  | 1539 | 63.3559483  |
| BH1090 | 5    | 567  | 2.210361766 |
| glpP   | 17   | 552  | 7.71944821  |
| glpF   | 438  | 831  | 132.1142005 |
| glpK   | 1160 | 1494 | 194.6183588 |
| BH1094 | 557  | 1224 | 114.0644187 |
| glpD   | 2473 | 1662 | 372.9662304 |
| BH1096 | 5    | 489  | 2.562934808 |
| BH1097 | 48   | 318  | 37.83472064 |
| BH1098 | 48   | 396  | 30.38242718 |
| BH1099 | 1152 | 504  | 572.9257697 |
| BH1100 | 4    | 1557 | 0.643943543 |
| BH1101 | 2    | 1170 | 0.428470127 |
| BH1102 | 1    | 246  | 1.018922863 |
| BH1103 | 0    | 1107 | 0           |
| BH1104 | 1    | 1095 | 0.228908698 |
| BH1105 | 4    | 1128 | 0.888847604 |

|        |      |      |             |
|--------|------|------|-------------|
| BH1106 | 789  | 1737 | 113.855391  |
| galK   | 21   | 1188 | 4.430770631 |
| galE   | 27   | 1005 | 6.734015577 |
| galT   | 89   | 1527 | 14.60923193 |
| BH1110 | 152  | 219  | 173.9706104 |
| BH1111 | 262  | 324  | 202.6901739 |
| spoVR  | 3    | 1236 | 0.608385981 |
| BH1113 | 0    | 105  | 0           |
| BH1114 | 55   | 2805 | 4.914804397 |
| BH1115 | 21   | 1101 | 4.780886021 |
| BH1116 | 150  | 3192 | 11.77890152 |
| BH1117 | 3    | 1305 | 0.576218447 |
| BH1118 | 6    | 957  | 1.571504854 |
| BH1119 | 2    | 846  | 0.592565069 |
| BH1120 | 25   | 1077 | 5.818361751 |
| BH1121 | 3    | 633  | 1.187938504 |
| BH1122 | 3    | 1761 | 0.427010263 |
| BH1123 | 22   | 1581 | 3.487925701 |
| BH1124 | 1078 | 510  | 529.815914  |
| BH1125 | 190  | 1746 | 27.27631993 |
| BH1126 | 408  | 1806 | 56.62638421 |
| BH1127 | 51   | 1203 | 10.62627285 |
| BH1128 | 487  | 1362 | 89.6248141  |
| BH1129 | 101  | 1176 | 21.52734477 |
| BH1130 | 4    | 1146 | 0.874886647 |
| BH1131 | 2    | 1641 | 0.305490584 |
| BH1132 | 4    | 1359 | 0.737763132 |
| BH1133 | 1    | 213  | 1.176784151 |
| BH1134 | 9    | 912  | 2.473569318 |
| BH1135 | 7    | 783  | 2.240849514 |
| BH1136 | 12   | 1515 | 1.985386331 |
| BH1137 | 47   | 1947 | 6.050737617 |
| sspA   | 3    | 204  | 3.686103298 |
| BH1139 | 2    | 246  | 2.037845726 |
| BH1140 | 147  | 1098 | 33.55763986 |
| BH1141 | 157  | 894  | 44.01883535 |
| BH1142 | 19   | 186  | 25.60454549 |
| BH1143 | 17   | 216  | 19.72747876 |
| BH1144 | 0    | 489  | 0           |
| BH1145 | 2    | 1215 | 0.412600863 |
| BH1146 | 1    | 1380 | 0.181634076 |



|        |      |      |             |
|--------|------|------|-------------|
| BH1147 | 8    | 1347 | 1.488671265 |
| BH1148 | 166  | 1113 | 37.3843073  |
| BH1149 | 1401 | 351  | 1000.477746 |
| BH1150 | 64   | 1356 | 11.83032563 |
| BH1151 | 61   | 843  | 18.13755217 |
| BH1152 | 224  | 1497 | 37.50616261 |
| BH1153 | 51   | 699  | 18.28813482 |
| BH1154 | 152  | 2253 | 16.91059196 |
| BH1155 | 697  | 99   | 1764.712645 |
| BH1156 | 24   | 51   | 117.9553055 |
| BH1157 | 1542 | 1752 | 220.6107576 |
| BH1158 | 1969 | 2025 | 243.7233297 |
| BH1159 | 36   | 1725 | 5.231061375 |
| BH1160 | 31   | 582  | 13.35104081 |
| BH1161 | 51   | 1221 | 10.46962018 |
| BH1162 | 29   | 180  | 40.38330946 |
| BH1163 | 60   | 750  | 20.05240194 |
| BH1164 | 90   | 408  | 55.29154947 |
| BH1165 | 143  | 858  | 41.77583737 |
| natA   | 201  | 900  | 55.97962208 |
| BH1167 | 391  | 1278 | 76.68710053 |
| BH1168 | 785  | 270  | 728.7562742 |
| BH1169 | 1464 | 843  | 435.3012521 |
| BH1170 | 0    | 1326 | 0           |
| BH1171 | 4    | 357  | 2.808459655 |
| BH1172 | 159  | 684  | 58.26629949 |
| BH1173 | 384  | 1431 | 67.26172558 |
| BH1174 | 276  | 1200 | 57.65065558 |
| BH1175 | 501  | 963  | 130.4030811 |
| BH1176 | 74   | 276  | 67.20460795 |
| prsA   | 1863 | 1002 | 466.0382337 |
| BH1178 | 21   | 87   | 60.50293689 |
| BH1179 | 7    | 87   | 20.16764563 |
| BH1180 | 54   | 180  | 75.19650727 |
| BH1181 | 79   | 600  | 33.00291153 |
| BH1182 | 41   | 543  | 18.92606997 |
| BH1183 | 0    | 1215 | 0           |
| BH1184 | 13   | 219  | 14.87906537 |
| hpr    | 188  | 579  | 81.38712359 |
| BH1186 | 320  | 345  | 232.4916167 |
| BH1187 | 173  | 192  | 225.8506208 |

|        |      |      |             |
|--------|------|------|-------------|
| serC   | 1247 | 1086 | 287.814747  |
| hit    | 97   | 429  | 56.67491224 |
| BH1190 | 70   | 495  | 35.44616504 |
| ecsA   | 223  | 744  | 75.12912689 |
| ecsB   | 761  | 1218 | 156.6079421 |
| BH1193 | 583  | 750  | 194.8425055 |
| ccdA   | 76   | 717  | 26.56873339 |
| BH1195 | 7    | 408  | 4.300453847 |
| BH1196 | 13   | 663  | 4.914804397 |
| BH1197 | 24   | 861  | 6.98689963  |
| BH1198 | 240  | 813  | 73.9941031  |
| BH1199 | 456  | 1056 | 108.2373968 |
| BH1200 | 205  | 630  | 81.56234916 |
| pbpF   | 34   | 2160 | 3.945495752 |
| hemE   | 187  | 1035 | 45.2874295  |
| hemH   | 238  | 933  | 63.93986685 |
| hemY   | 669  | 1404 | 119.4360479 |
| BH1205 | 119  | 1098 | 27.16570846 |
| BH1206 | 115  | 156  | 184.7777422 |
| BH1207 | 0    | 1284 | 0           |
| BH1208 | 3    | 186  | 4.042822972 |
| BH1209 | 349  | 1011 | 86.52680857 |
| BH1210 | 96   | 759  | 31.70340228 |
| BH1211 | 80   | 795  | 25.22314709 |
| spo0B  | 358  | 534  | 168.0421324 |
| obg    | 1516 | 1284 | 295.9447171 |
| pheB   | 447  | 444  | 252.3486393 |
| pheA   | 633  | 879  | 180.5058366 |
| BH1216 | 135  | 540  | 62.66375606 |
| nifS   | 86   | 1128 | 19.11022348 |
| nadB   | 3    | 1530 | 0.49148044  |
| nadC   | 7    | 846  | 2.073977742 |
| nadA   | 11   | 1104 | 2.497468539 |
| BH1221 | 1    | 1335 | 0.187756572 |
| BH1222 | 79   | 981  | 20.18526699 |
| BH1223 | 1    | 537  | 0.466769133 |
| ruvA   | 284  | 612  | 116.3170374 |
| ruvB   | 522  | 762  | 171.7085599 |
| BH1226 | 58   | 216  | 67.30551577 |
| queA   | 1592 | 1044 | 382.2249029 |
| tgt    | 2372 | 1140 | 521.5383487 |

|        |      |      |             |
|--------|------|------|-------------|
| BH1229 | 1040 | 267  | 976.3341768 |
| BH1230 | 6    | 384  | 3.916484754 |
| BH1231 | 11   | 1287 | 2.142350635 |
| BH1232 | 3    | 657  | 1.14454349  |
| spoVB  | 89   | 1569 | 14.21816262 |
| BH1234 | 279  | 405  | 172.6734611 |
| BH1235 | 355  | 276  | 322.4004841 |
| secD   | 1356 | 1314 | 258.6668287 |
| secF   | 1267 | 936  | 339.2947817 |
| BH1238 | 132  | 903  | 36.64060155 |
| BH1239 | 51   | 318  | 40.19939068 |
| BH1240 | 1727 | 2355 | 183.8136844 |
| apt    | 634  | 516  | 307.9753592 |
| relA   | 1839 | 2187 | 210.7702742 |
| BH1243 | 815  | 441  | 463.2286729 |
| BH1244 | 24   | 1323 | 4.547029918 |
| BH1245 | 11   | 1338 | 2.06069153  |
| BH1246 | 14   | 822  | 4.269063673 |
| BH1247 | 13   | 723  | 4.506936812 |
| BH1248 | 56   | 1023 | 13.72109615 |
| BH1249 | 114  | 969  | 29.48882638 |
| BH1250 | 94   | 1017 | 23.16772102 |
| hisS   | 698  | 1287 | 135.9418857 |
| aspS   | 1297 | 1788 | 181.8230237 |
| BH1253 | 89   | 1254 | 17.78971065 |
| BH1254 | 27   | 300  | 22.55895218 |
| BH1255 | 947  | 780  | 304.3209076 |
| BH1256 | 154  | 612  | 63.07332309 |
| BH1257 | 205  | 1287 | 39.92562546 |
| BH1258 | 300  | 705  | 106.6617124 |
| BH1259 | 251  | 420  | 149.7962169 |
| BH1260 | 1113 | 1161 | 240.2920258 |
| BH1261 | 998  | 1116 | 224.1520737 |
| BH1262 | 266  | 645  | 103.3709092 |
| BH1263 | 492  | 1176 | 104.8658775 |
| BH1264 | 458  | 474  | 242.1940952 |
| BH1265 | 228  | 189  | 302.3774896 |
| BH1266 | 30   | 1077 | 6.982034101 |
| alaS   | 2153 | 2640 | 204.4167679 |
| BH1268 | 806  | 273  | 740.0291192 |
| BH1269 | 2490 | 423  | 1475.487022 |

|        |      |      |             |
|--------|------|------|-------------|
| BH1270 | 1218 | 282  | 1082.616381 |
| BH1271 | 2444 | 1149 | 533.1600342 |
| BH1272 | 309  | 672  | 115.2565513 |
| BH1273 | 847  | 930  | 228.2847371 |
| BH1274 | 1591 | 1263 | 315.7499157 |
| udk    | 818  | 636  | 322.3833488 |
| greA   | 854  | 477  | 448.7618254 |
| BH1277 | 381  | 552  | 173.0064569 |
| BH1278 | 38   | 210  | 45.35662343 |
| BH1279 | 416  | 696  | 149.8167961 |
| BH1280 | 99   | 246  | 100.8733634 |
| BH1281 | 96   | 624  | 38.56231142 |
| BH1282 | 9    | 669  | 3.372040685 |
| BH1283 | 169  | 216  | 196.1143477 |
| BH1284 | 130  | 1425 | 22.86677414 |
| sigK   | 0    | 708  | 0           |
| BH1286 | 12   | 357  | 8.425378966 |
| BH1287 | 15   | 555  | 6.774460115 |
| xre    | 32   | 339  | 23.66065126 |
| BH1289 | 5    | 159  | 7.882233467 |
| BH1290 | 48   | 582  | 20.67257932 |
| BH1291 | 56   | 432  | 32.49231796 |
| BH1292 | 35   | 120  | 73.1077154  |
| BH1293 | 111  | 285  | 97.62353576 |
| cwlC   | 307  | 762  | 100.9856856 |
| BH1295 | 324  | 2646 | 30.69245195 |
| BH1296 | 6    | 840  | 1.79039303  |
| BH1297 | 21   | 828  | 6.357192644 |
| BH1298 | 210  | 834  | 63.11457445 |
| BH1299 | 115  | 738  | 39.05870974 |
| BH1300 | 68   | 543  | 31.38957946 |
| BH1301 | 0    | 1284 | 0           |
| BH1302 | 25   | 720  | 8.703299453 |
| BH1303 | 1    | 789  | 0.317686976 |
| BH1304 | 0    | 183  | 0           |
| BH1305 | 0    | 213  | 0           |
| katX   | 10   | 1602 | 1.564638104 |
| BH1307 | 0    | 1326 | 0           |
| BH1308 | 37   | 966  | 9.600658278 |
| BH1309 | 3482 | 273  | 3196.999247 |
| pssA   | 267  | 540  | 123.9349842 |

|        |      |      |             |
|--------|------|------|-------------|
| psd    | 149  | 780  | 47.88153668 |
| BH1312 | 102  | 459  | 55.7011165  |
| BH1313 | 111  | 354  | 78.59521947 |
| BH1314 | 134  | 288  | 116.6242127 |
| BH1315 | 153  | 477  | 80.39878136 |
| BH1316 | 484  | 1482 | 81.8603453  |
| BH1317 | 197  | 339  | 145.6608843 |
| BH1318 | 179  | 441  | 101.7397944 |
| BH1319 | 832  | 2415 | 86.35402906 |
| BH1320 | 1    | 231  | 1.085086685 |
| BH1321 | 88   | 141  | 156.4371783 |
| BH1322 | 420  | 516  | 204.0215314 |
| BH1323 | 831  | 1104 | 188.672396  |
| aroD   | 847  | 837  | 253.6497079 |
| BH1325 | 294  | 291  | 253.2390967 |
| BH1326 | 701  | 624  | 281.5852115 |
| BH1327 | 345  | 564  | 153.3262116 |
| BH1328 | 306  | 354  | 216.6679023 |
| BH1329 | 1024 | 873  | 294.010017  |
| BH1330 | 818  | 744  | 275.5857659 |
| comER  | 131  | 828  | 39.65677316 |
| BH1332 | 31   | 261  | 29.7712864  |
| comEA  | 49   | 633  | 19.40299556 |
| comEB  | 58   | 567  | 25.64019648 |
| comEC  | 48   | 2322 | 5.181499209 |
| BH1336 | 64   | 138  | 116.2458083 |
| BH1337 | 620  | 1029 | 151.0263509 |
| BH1338 | 0    | 1215 | 0           |
| rpsT   | 3937 | 276  | 3575.466777 |
| gpr    | 18   | 1119 | 4.031984304 |
| BH1341 | 3    | 339  | 2.218186055 |
| lepA   | 903  | 1830 | 123.6838726 |
| hemN   | 261  | 1158 | 56.49478526 |
| hrcA   | 1150 | 1032 | 279.3151917 |
| grpE   | 684  | 585  | 293.0735668 |
| dnaK   | 5414 | 1845 | 735.5264505 |
| BH1347 | 0    | 1218 | 0           |
| dnaJ   | 754  | 1113 | 169.8058295 |
| BH1349 | 1051 | 942  | 279.6586311 |
| BH1350 | 1087 | 753  | 361.8353404 |
| BH1351 | 1362 | 1347 | 253.4462829 |

|        |      |      |             |
|--------|------|------|-------------|
| dra    | 1168 | 675  | 433.7260271 |
| BH1353 | 67   | 933  | 17.99987848 |
| rpsU   | 2950 | 174  | 4249.611043 |
| BH1355 | 5273 | 444  | 2976.810682 |
| BH1356 | 1423 | 1338 | 266.5785497 |
| BH1357 | 3415 | 996  | 859.4246062 |
| BH1358 | 1965 | 531  | 927.5652027 |
| BH1359 | 8    | 294  | 6.820544877 |
| BH1360 | 76   | 1194 | 15.95459116 |
| phoH   | 937  | 963  | 243.8875989 |
| BH1362 | 750  | 2166 | 86.7919059  |
| BH1363 | 341  | 480  | 178.0695068 |
| BH1364 | 263  | 393  | 167.7411485 |
| BH1365 | 363  | 753  | 120.8336969 |
| cdd    | 339  | 399  | 212.9625394 |
| bex    | 825  | 915  | 226.0004317 |
| BH1368 | 59   | 150  | 98.5909762  |
| BH1369 | 234  | 765  | 76.67094859 |
| glyQ   | 383  | 894  | 107.3835283 |
| glyS   | 811  | 2082 | 97.63747582 |
| BH1372 | 622  | 645  | 241.7169381 |
| BH1373 | 709  | 813  | 218.5909129 |
| BH1374 | 329  | 474  | 173.9778544 |
| dnaG   | 2190 | 1800 | 304.9636128 |
| sigA   | 1817 | 1119 | 407.0064156 |
| BH1377 | 116  | 531  | 54.75702978 |
| cccB   | 1690 | 375  | 1129.618643 |
| BH1379 | 178  | 708  | 63.01778858 |
| BH1380 | 384  | 1119 | 86.01566516 |
| BH1381 | 15   | 450  | 8.355167475 |
| BH1382 | 798  | 945  | 211.6642427 |
| BH1383 | 108  | 495  | 54.68836893 |
| BH1384 | 1    | 759  | 0.330243774 |
| BH1385 | 965  | 1317 | 183.6614263 |
| BH1386 | 736  | 897  | 205.6656609 |
| BH1387 | 29   | 267  | 27.22470301 |
| BH1388 | 426  | 1107 | 96.45803101 |
| BH1389 | 899  | 753  | 299.2548032 |
| BH1390 | 1674 | 879  | 477.3566673 |
| BH1391 | 1437 | 696  | 517.5161923 |
| ppk    | 447  | 2118 | 52.90028132 |

|           |      |      |             |
|-----------|------|------|-------------|
| BH1393    | 12   | 1557 | 1.93183063  |
| BH1394    | 91   | 780  | 29.24308616 |
| BH1395    | 68   | 864  | 19.72747876 |
| BH1396    | 120  | 417  | 72.13094223 |
| BH1397    | 33   | 108  | 76.58903519 |
| BH1398    | 9    | 222  | 10.16169017 |
| BH1399    | 165  | 588  | 70.33686905 |
| BH1400    | 10   | 477  | 5.254822311 |
| gcpE      | 2383 | 1104 | 541.0425025 |
| BH1402    | 1    | 327  | 0.766529126 |
| BH1403    | 55   | 1212 | 11.37460919 |
| BH1404    | 772  | 894  | 216.4493051 |
| BH1405    | 236  | 651  | 90.86725917 |
| BH1406    | 70   | 780  | 22.49468166 |
| BH1407    | 949  | 1632 | 145.7546679 |
| trnL-Asn  | 270  | 75   | 902.3580873 |
| trnL-Met1 | 294  | 74   | 995.8456369 |
| trnL-Met2 | 1572 | 77   | 5117.268807 |
| trnL-Ser  | 885  | 93   | 2385.265553 |
| BH1408    | 65   | 471  | 34.5914577  |
| sodA      | 5613 | 609  | 2310.224386 |
| BH1410    | 103  | 1290 | 20.0135407  |
| pbpA      | 1321 | 2085 | 158.8082911 |
| BH1412    | 0    | 1218 | 0           |
| BH1413    | 122  | 363  | 84.24218446 |
| BH1414    | 16   | 660  | 6.076485436 |
| BH1415    | 141  | 2772 | 12.74976855 |
| mpg       | 31   | 750  | 10.36040767 |
| BH1417    | 268  | 561  | 119.7425071 |
| BH1418    | 327  | 789  | 103.8836412 |
| moeB      | 787  | 1023 | 192.8304048 |
| nahS      | 263  | 198  | 332.9407645 |
| BH1421    | 277  | 1545 | 44.93944448 |
| BH1422    | 7    | 879  | 1.996115096 |
| BH1423    | 13   | 1464 | 2.225761827 |
| BH1424    | 5    | 516  | 2.428827754 |
| glk       | 988  | 993  | 249.3929144 |
| ansB      | 1470 | 1416 | 260.2139023 |
| BH1427    | 34   | 1725 | 4.940446855 |
| BH1428    | 4    | 411  | 2.439464956 |
| BH1429    | 25   | 642  | 9.760709667 |

|        |       |      |             |
|--------|-------|------|-------------|
| BH1430 | 478   | 1110 | 107.9397312 |
| BH1431 | 245   | 636  | 96.55735997 |
| BH1432 | 117   | 198  | 148.1143325 |
| BH1433 | 339   | 786  | 108.1069379 |
| BH1434 | 498   | 1098 | 113.6850656 |
| BH1435 | 424   | 813  | 130.7229155 |
| BH1436 | 173   | 591  | 73.37279051 |
| BH1437 | 481   | 1077 | 111.9452801 |
| BH1438 | 110   | 435  | 63.38402912 |
| BH1439 | 78    | 516  | 37.88971297 |
| BH1440 | 94    | 729  | 32.32040093 |
| BH1441 | 282   | 552  | 128.0520233 |
| BH1442 | 21    | 180  | 29.24308616 |
| BH1443 | 28    | 324  | 21.6615453  |
| BH1444 | 38    | 219  | 43.49265261 |
| citG   | 42    | 1389 | 7.579201597 |
| BH1446 | 998   | 1221 | 204.8760968 |
| BH1447 | 153   | 432  | 88.77365442 |
| BH1448 | 129   | 540  | 59.87870024 |
| BH1449 | 0     | 117  | 0           |
| BH1450 | 4     | 246  | 4.075691451 |
| BH1451 | 8     | 213  | 9.414273211 |
| BH1452 | 29    | 141  | 51.55316101 |
| BH1453 | 319   | 987  | 81.01211017 |
| BH1454 | 89    | 1077 | 20.71336783 |
| BH1455 | 45    | 1083 | 10.41502871 |
| BH1456 | 16    | 1521 | 2.636739243 |
| BH1457 | 47    | 1701 | 6.9258002   |
| BH1459 | 8     | 858  | 2.337109783 |
| BH1458 | 1     | 288  | 0.870329945 |
| BH1460 | 18368 | 162  | 28419.94744 |
| BH1461 | 1291  | 831  | 389.4050978 |
| BH1462 | 341   | 657  | 130.0964433 |
| BH1463 | 588   | 723  | 203.8522189 |
| BH1464 | 138   | 981  | 35.2603398  |
| BH1465 | 137   | 513  | 66.93906105 |
| BH1466 | 190   | 783  | 60.82305825 |
| BH1467 | 10    | 90   | 27.85055825 |
| BH1468 | 527   | 417  | 316.7750546 |
| BH1469 | 1501  | 1119 | 336.2226911 |
| BH1470 | 59    | 1443 | 10.24854222 |



|        |      |      |             |
|--------|------|------|-------------|
| BH1471 | 39   | 207  | 47.22485964 |
| BH1472 | 146  | 1242 | 29.46508337 |
| BH1473 | 0    | 1143 | 0           |
| BH1474 | 1048 | 2238 | 117.3755431 |
| BH1475 | 203  | 300  | 169.6098997 |
| BH1476 | 894  | 426  | 526.0225157 |
| BH1477 | 3203 | 1395 | 575.5183101 |
| BH1478 | 190  | 438  | 108.7316315 |
| BH1479 | 110  | 603  | 45.72479713 |
| BH1480 | 52   | 435  | 29.96335922 |
| BH1481 | 162  | 1017 | 39.92734899 |
| BH1482 | 20   | 441  | 11.3675748  |
| BH1483 | 0    | 252  | 0           |
| BH1484 | 453  | 753  | 150.7924648 |
| BH1485 | 0    | 147  | 0           |
| cysH   | 3    | 696  | 1.080409587 |
| BH1487 | 20   | 1146 | 4.374433233 |
| BH1488 | 10   | 1077 | 2.3273447   |
| BH1489 | 4    | 609  | 1.646338419 |
| BH1490 | 0    | 45   | 0           |
| BH1491 | 21   | 1767 | 2.97892219  |
| BH1492 | 4    | 822  | 1.219732478 |
| BH1493 | 8    | 897  | 2.235496314 |
| BH1494 | 16   | 303  | 13.23590887 |
| BH1495 | 53   | 1458 | 9.11160239  |
| BH1496 | 41   | 840  | 12.23435237 |
| BH1497 | 25   | 642  | 9.760709667 |
| BH1498 | 23   | 531  | 10.85699728 |
| BH1499 | 363  | 759  | 119.8784899 |
| BH1500 | 243  | 1371 | 44.42682049 |
| BH1501 | 88   | 825  | 26.73653592 |
| BH1502 | 20   | 225  | 22.2804466  |
| BH1503 | 178  | 840  | 53.11499323 |
| BH1504 | 195  | 1251 | 39.07092704 |
| BH1505 | 159  | 1125 | 35.42591009 |
| BH1506 | 200  | 780  | 64.27051904 |
| BH1507 | 29   | 261  | 27.85055825 |
| BH1508 | 246  | 1848 | 33.36641556 |
| BH1509 | 264  | 1503 | 44.02722981 |
| BH1510 | 277  | 732  | 94.85169633 |
| BH1511 | 426  | 864  | 123.5868522 |

|         |      |      |             |
|---------|------|------|-------------|
| BH1512  | 455  | 522  | 218.4828276 |
| BH1513  | 22   | 1527 | 3.611270814 |
| BH1514  | 4    | 597  | 1.679430648 |
| BH1515  | 333  | 522  | 159.9006189 |
| BH1516  | 29   | 1032 | 7.043600487 |
| BH1517  | 184  | 966  | 47.74381414 |
| BH1518  | 161  | 1014 | 39.79828294 |
| BH1519  | 153  | 963  | 39.82369544 |
| BH1520  | 214  | 642  | 83.55167475 |
| BH1521  | 113  | 837  | 33.83992561 |
| BH1522  | 74   | 534  | 34.73496591 |
| BH1523  | 6    | 1185 | 1.269139363 |
| BH1524  | 114  | 552  | 51.76571153 |
| BH1525  | 326  | 1176 | 69.48430094 |
| spoIIM  | 139  | 654  | 53.27377427 |
| BH1527  | 858  | 453  | 474.7505757 |
| BH1528  | 319  | 228  | 350.6971611 |
| BH1529  | 730  | 900  | 203.3090752 |
| BH1530  | 1039 | 1182 | 220.3304316 |
| BH1531  | 1151 | 819  | 352.2636543 |
| BH1532  | 1456 | 828  | 440.7653566 |
| pdp     | 3273 | 1302 | 630.1028374 |
| BH1534  | 1396 | 417  | 839.1232946 |
| dacF    | 39   | 1164 | 8.398235348 |
| spoIIAA | 13   | 351  | 9.283519416 |
| spoIIAB | 18   | 441  | 10.23081732 |
| sigF    | 31   | 759  | 10.23755698 |
| spoVAC  | 1    | 456  | 0.549682071 |
| spoVAD  | 3    | 1008 | 0.745997096 |
| spoVAE  | 1    | 351  | 0.714116878 |
| spoVAE  | 2    | 567  | 0.884144706 |
| spoVAF  | 9    | 1482 | 1.522196503 |
| BH1544  | 558  | 1320 | 105.9587148 |
| BH1545  | 734  | 438  | 420.0474607 |
| BH1546  | 0    | 1218 | 0           |
| BH1547  | 96   | 1986 | 12.11625495 |
| BH1548  | 0    | 1284 | 0           |
| BH1549  | 6    | 1125 | 1.336826796 |
| BH1550  | 23   | 2070 | 2.785055825 |
| BH1551  | 12   | 1404 | 2.142350635 |
| BH1552  | 29   | 1257 | 5.782812811 |

|        |      |      |             |
|--------|------|------|-------------|
| BH1553 | 41   | 756  | 13.59372486 |
| ribG   | 576  | 1107 | 130.4221264 |
| ribB   | 310  | 648  | 119.9121258 |
| ribA   | 464  | 1215 | 95.7234002  |
| ribH   | 125  | 471  | 66.52203403 |
| ribT   | 81   | 348  | 58.34211771 |
| BH1559 | 95   | 537  | 44.3430676  |
| BH1560 | 234  | 783  | 74.90839805 |
| BH1561 | 152  | 594  | 64.1406796  |
| BH1562 | 21   | 807  | 6.522621449 |
| BH1563 | 23   | 882  | 6.536355507 |
| BH1564 | 10   | 1563 | 1.603678978 |
| BH1565 | 2    | 666  | 0.752717791 |
| BH1566 | 4    | 504  | 1.989325589 |
| BH1567 | 0    | 420  | 0           |
| BH1568 | 3    | 480  | 1.566593902 |
| BH1569 | 4    | 1017 | 0.985860469 |
| BH1570 | 4    | 351  | 2.856467513 |
| BH1571 | 2    | 189  | 2.652434119 |
| BH1572 | 5    | 852  | 1.470980189 |
| BH1573 | 1    | 1149 | 0.218150587 |
| BH1574 | 0    | 594  | 0           |
| BH1575 | 2    | 537  | 0.933538265 |
| rluB   | 239  | 729  | 82.17633854 |
| resA   | 309  | 531  | 145.8613983 |
| resB   | 1005 | 1671 | 150.7530218 |
| resC   | 727  | 1200 | 151.8551689 |
| resD   | 351  | 717  | 122.7055976 |
| resE   | 1503 | 1785 | 211.0557431 |
| BH1582 | 47   | 432  | 27.27033829 |
| BH1583 | 37   | 477  | 19.44284255 |
| BH1584 | 79   | 957  | 20.69148058 |
| BH1585 | 7972 | 984  | 2030.713266 |
| BH1586 | 1406 | 1062 | 331.8464822 |
| BH1587 | 1624 | 1476 | 275.7884549 |
| cobD   | 467  | 960  | 121.9332253 |
| BH1589 | 365  | 1113 | 82.20043472 |
| cobP   | 220  | 567  | 97.2559177  |
| cobQ   | 406  | 1506 | 67.57366523 |
| cobS   | 249  | 786  | 79.40598096 |
| BH1593 | 276  | 630  | 109.8107725 |

|        |      |      |             |
|--------|------|------|-------------|
| BH1594 | 216  | 423  | 127.9940549 |
| BH1595 | 194  | 591  | 82.27931422 |
| BH1596 | 251  | 918  | 68.53421687 |
| BH1597 | 10   | 1491 | 1.681120216 |
| BH1598 | 2    | 1113 | 0.450413341 |
| BH1599 | 13   | 1110 | 2.935599383 |
| BH1600 | 11   | 912  | 3.023251389 |
| BH1601 | 117  | 384  | 76.3714527  |
| BH1602 | 2221 | 1623 | 343.0097405 |
| BH1603 | 11   | 1068 | 2.581652871 |
| BH1604 | 1316 | 492  | 670.4512437 |
| BH1605 | 413  | 249  | 415.7450804 |
| BH1606 | 224  | 1080 | 51.98770873 |
| BH1607 | 205  | 1476 | 34.81319781 |
| BH1608 | 73   | 597  | 30.64960933 |
| BH1609 | 71   | 240  | 74.15211134 |
| BH1610 | 130  | 450  | 72.41145145 |
| BH1611 | 64   | 237  | 67.68743271 |
| BH1612 | 9    | 336  | 6.713973864 |
| BH1613 | 245  | 1215 | 50.54360571 |
| BH1614 | 297  | 939  | 79.28066262 |
| sigY   | 234  | 531  | 110.4581463 |
| BH1616 | 510  | 969  | 131.923697  |
| BH1617 | 26   | 414  | 15.74161988 |
| BH1618 | 176  | 771  | 57.21826753 |
| BH1619 | 65   | 135  | 120.6857524 |
| BH1620 | 386  | 606  | 159.6581508 |
| ddlA   | 464  | 918  | 126.6927356 |
| BH1622 | 1059 | 1266 | 209.6711459 |
| BH1623 | 517  | 969  | 133.7344144 |
| BH1624 | 623  | 969  | 161.1538494 |
| BH1625 | 16   | 648  | 6.189012944 |
| BH1626 | 71   | 162  | 109.8549798 |
| metB   | 235  | 1137 | 51.8064474  |
| metC   | 211  | 1173 | 45.08798816 |
| BH1629 | 329  | 1857 | 44.4079176  |
| metH   | 613  | 3441 | 44.65316183 |
| sleB   | 4    | 993  | 1.009687912 |
| BH1632 | 6    | 1344 | 1.118995644 |
| BH1633 | 87   | 678  | 32.1636978  |
| cmk    | 944  | 669  | 353.6896007 |

|        |      |      |             |
|--------|------|------|-------------|
| BH1635 | 933  | 588  | 397.7230232 |
| ypfD   | 2821 | 1152 | 613.8001939 |
| BH1637 | 17   | 612  | 6.962639562 |
| BH1638 | 716  | 1314 | 136.5821898 |
| BH1639 | 563  | 621  | 227.2444101 |
| gpsA   | 1687 | 1038 | 407.3747841 |
| BH1641 | 153  | 270  | 142.0378471 |
| BH1642 | 0    | 471  | 0           |
| BH1643 | 48   | 210  | 57.29257697 |
| BH1644 | 262  | 756  | 86.8672174  |
| spoIVA | 67   | 1479 | 11.35489292 |
| mtrA   | 300  | 567  | 132.6217059 |
| mtrB   | 233  | 231  | 252.8251976 |
| gerCA  | 357  | 819  | 109.2598824 |
| gerCB  | 491  | 738  | 166.7637085 |
| BH1650 | 667  | 834  | 200.4639103 |
| BH1651 | 739  | 621  | 298.2835152 |
| BH1652 | 894  | 864  | 259.3583237 |
| gerCC  | 1419 | 972  | 365.9253903 |
| ndk    | 93   | 444  | 52.50206589 |
| cheR   | 247  | 774  | 79.98939404 |
| aroF   | 1426 | 1173 | 304.7178726 |
| aroB   | 1202 | 969  | 310.9260466 |
| aroH   | 625  | 378  | 414.4428311 |
| trpE   | 553  | 1509 | 91.85701021 |
| trpD   | 385  | 1029 | 93.78249206 |
| trpC   | 264  | 774  | 85.49473695 |
| trpF   | 221  | 657  | 84.31470374 |
| trpB   | 455  | 1200 | 95.04003003 |
| trpA   | 294  | 798  | 92.34658788 |
| hisC   | 1492 | 1110 | 336.916483  |
| tyrA   | 557  | 1101 | 126.8073102 |
| aroE   | 1760 | 1296 | 340.3957119 |
| BH1668 | 188  | 927  | 50.83402865 |
| BH1669 | 237  | 804  | 73.88711535 |
| BH1670 | 412  | 552  | 187.0830978 |
| BH1671 | 98   | 468  | 52.48759055 |
| qcrA   | 3650 | 501  | 1826.129418 |
| qcrB   | 2935 | 672  | 1094.750738 |
| qcrC   | 2979 | 783  | 953.641529  |
| BH1675 | 156  | 609  | 64.20719833 |

|        |      |      |             |
|--------|------|------|-------------|
| BH1676 | 311  | 786  | 99.17775132 |
| BH1677 | 396  | 675  | 147.0509476 |
| BH1678 | 93   | 873  | 26.70208162 |
| BH1679 | 82   | 345  | 59.57597678 |
| dapB   | 223  | 795  | 70.30952252 |
| mgsA   | 83   | 417  | 49.89056837 |
| BH1682 | 226  | 696  | 81.39085557 |
| BH1683 | 282  | 1128 | 62.66375606 |
| papS   | 574  | 1128 | 127.5496311 |
| birA   | 413  | 972  | 106.5025977 |
| BH1686 | 0    | 1215 | 0           |
| panB   | 136  | 840  | 40.58224202 |
| panC   | 153  | 852  | 45.01199379 |
| panD   | 76   | 384  | 49.60880688 |
| BH1690 | 233  | 1017 | 57.42637232 |
| dinG   | 1180 | 2829 | 104.5503459 |
| BH1692 | 741  | 1287 | 144.3165291 |
| BH1693 | 78   | 171  | 114.3338707 |
| BH1694 | 276  | 477  | 145.0330958 |
| aspB   | 1672 | 1188 | 352.7737378 |
| asnS   | 886  | 1293 | 171.7558789 |
| dnaD   | 112  | 702  | 39.99054518 |
| nth    | 239  | 657  | 91.18196468 |
| BH1699 | 164  | 498  | 82.54502806 |
| BH1700 | 1749 | 3618 | 121.1707124 |
| BH1701 | 0    | 1215 | 0           |
| ponA   | 2998 | 2661 | 282.3990089 |
| BH1703 | 229  | 600  | 95.66666759 |
| BH1704 | 25   | 984  | 6.368267892 |
| BH1705 | 1    | 117  | 2.142350635 |
| BH1706 | 0    | 525  | 0           |
| BH1707 | 85   | 396  | 53.8022148  |
| BH1708 | 396  | 852  | 116.501631  |
| BH1709 | 254  | 612  | 104.0300264 |
| BH1710 | 369  | 207  | 446.8198258 |
| ilvA   | 1272 | 1248 | 255.4753132 |
| BH1712 | 150  | 897  | 41.91555589 |
| BH1713 | 450  | 930  | 121.2846891 |
| BH1714 | 153  | 261  | 146.9357039 |
| BH1715 | 256  | 339  | 189.28521   |
| BH1716 | 221  | 435  | 127.3442767 |

|        |      |      |             |
|--------|------|------|-------------|
| BH1717 | 496  | 582  | 213.616653  |
| BH1718 | 889  | 1143 | 194.9539077 |
| BH1719 | 77   | 213  | 90.61237966 |
| BH1720 | 152  | 480  | 79.37409101 |
| BH1721 | 299  | 1491 | 50.26549447 |
| BH1722 | 178  | 972  | 45.901846   |
| BH1723 | 54   | 747  | 18.11964031 |
| BH1724 | 4    | 51   | 19.65921759 |
| BH1725 | 373  | 906  | 103.1946181 |
| BH1726 | 336  | 1047 | 80.43943471 |
| BH1727 | 12   | 810  | 3.713407767 |
| gltA   | 1835 | 4593 | 100.1419485 |
| gltB   | 650  | 1488 | 109.4931221 |
| BH1730 | 89   | 639  | 34.91126316 |
| BH1731 | 354  | 369  | 240.4657956 |
| BH1732 | 40   | 252  | 39.78651178 |
| BH1733 | 74   | 180  | 103.0470655 |
| BH1734 | 77   | 159  | 121.3863954 |
| BH1735 | 19   | 1662 | 2.86549065  |
| BH1736 | 4    | 1197 | 0.837610774 |
| BH1737 | 14   | 1029 | 3.410272439 |
| BH1738 | 15   | 1449 | 2.594772508 |
| BH1739 | 10   | 1221 | 2.052866701 |
| BH1740 | 78   | 1374 | 14.22932452 |
| BH1741 | 56   | 921  | 15.24069637 |
| BH1742 | 498  | 888  | 140.5700474 |
| BH1743 | 0    | 135  | 0           |
| BH1744 | 1    | 687  | 0.364854475 |
| BH1745 | 3    | 573  | 1.31232997  |
| BH1746 | 147  | 849  | 43.39963317 |
| BH1747 | 2    | 105  | 4.774381414 |
| bioB   | 33   | 1002 | 8.255105589 |
| BH1749 | 114  | 666  | 42.90491406 |
| sspD   | 20   | 183  | 27.39399172 |
| BH1751 | 2    | 150  | 3.34206699  |
| BH1752 | 74   | 1545 | 12.00548336 |
| BH1753 | 120  | 405  | 74.26815533 |
| BH1754 | 10   | 1047 | 2.394030795 |
| BH1755 | 11   | 1269 | 2.172738587 |
| BH1756 | 7    | 672  | 2.610989836 |
| BH1757 | 8    | 1269 | 1.580173518 |

|                               |       |      |             |
|-------------------------------|-------|------|-------------|
| BH1758                        | 2     | 237  | 2.115232272 |
| BH1759                        | 75    | 1062 | 17.70162601 |
| BH1760                        | 38    | 144  | 66.14507584 |
| BH1761                        | 1     | 111  | 2.258153372 |
| dsdA                          | 105   | 1329 | 19.80344435 |
| BH1763                        | 52    | 915  | 14.24487569 |
| BH1764                        | 314   | 2295 | 34.2944129  |
| BH1765                        | 220   | 1293 | 42.64818665 |
| BH1766                        | 11    | 90   | 30.63561407 |
| cotD                          | 152   | 384  | 99.21761376 |
| BH1768                        | 9     | 570  | 3.957710909 |
| BH1769                        | 129   | 315  | 102.6492004 |
| BH1770                        | 122   | 408  | 74.95076705 |
| RNase P RNA (1843317-1843710) | 60319 | 394  | 38373.75738 |
| BH1771                        | 1290  | 1158 | 279.2270995 |
| BH1772                        | 254   | 1446 | 44.02930578 |
| BH1773                        | 471   | 513  | 230.1335603 |
| bmrU                          | 1034  | 936  | 276.8988195 |
| blt                           | 379   | 1230 | 77.234353   |
| BH1776                        | 18    | 750  | 6.015720582 |
| BH1777                        | 173   | 693  | 62.57333217 |
| BH1778                        | 94    | 426  | 55.30885511 |
| BH1779                        | 182   | 864  | 52.80001668 |
| BH1780                        | 74    | 300  | 61.82823931 |
| BH1781                        | 92    | 1056 | 21.83736954 |
| BH1782                        | 73    | 408  | 44.84759012 |
| BH1783                        | 75    | 396  | 47.47254247 |
| BH1784                        | 64    | 363  | 44.19262135 |
| casA                          | 66    | 333  | 49.67937417 |
| BH1786                        | 109   | 699  | 39.08640578 |
| BH1787                        | 49    | 843  | 14.56950912 |
| BH1788                        | 53    | 1206 | 11.01551931 |
| BH1789                        | 653   | 1224 | 133.7236363 |
| BH1790                        | 21    | 1188 | 4.430770631 |
| BH1791                        | 204   | 1164 | 43.92923105 |
| BH1792                        | 1340  | 1932 | 173.849758  |
| cstA                          | 12    | 1743 | 1.725680029 |
| BH1794                        | 1     | 264  | 0.949450849 |
| BH1795                        | 13    | 942  | 3.45914577  |
| BH1796                        | 70    | 1587 | 11.05598721 |



|        |     |      |             |
|--------|-----|------|-------------|
| BH1797 | 21  | 948  | 5.552484714 |
| BH1798 | 26  | 852  | 7.649096984 |
| BH1799 | 30  | 801  | 9.387828623 |
| BH1800 | 28  | 762  | 9.210420838 |
| BH1801 | 171 | 927  | 46.23733457 |
| kinA   | 264 | 1803 | 36.70156761 |
| BH1803 | 22  | 624  | 8.837196368 |
| BH1804 | 5   | 681  | 1.840345259 |
| BH1805 | 218 | 1302 | 41.96835275 |
| BH1806 | 236 | 1077 | 54.92533493 |
| BH1807 | 189 | 816  | 58.05612694 |
| BH1808 | 22  | 696  | 7.92300364  |
| BH1809 | 20  | 1056 | 4.747254247 |
| BH1810 | 8   | 873  | 2.296953258 |
| BH1811 | 151 | 978  | 38.7003156  |
| BH1812 | 285 | 1161 | 61.53030311 |
| BH1813 | 46  | 126  | 91.5089771  |
| BH1814 | 43  | 894  | 12.05611414 |
| BH1815 | 94  | 996  | 23.65619707 |
| BH1816 | 100 | 315  | 79.57302357 |
| BH1817 | 25  | 678  | 9.242441897 |
| BH1818 | 71  | 996  | 17.86797864 |
| BH1819 | 77  | 759  | 25.42877058 |
| BH1820 | 28  | 1158 | 6.060743246 |
| BH1821 | 46  | 774  | 14.89681023 |
| acoA   | 0   | 1014 | 0           |
| acoB   | 3   | 1035 | 0.726536302 |
| acoC   | 1   | 1233 | 0.203288746 |
| acoL   | 12  | 1380 | 2.179608906 |
| aciR   | 38  | 1872 | 5.088082757 |
| mcpC   | 285 | 2037 | 35.0695542  |
| mdmC   | 152 | 672  | 56.69577929 |
| adhB   | 55  | 1137 | 12.12491322 |
| BH1830 | 8   | 144  | 13.92527912 |
| BH1831 | 257 | 1785 | 36.08870657 |
| BH1832 | 132 | 735  | 45.01559619 |
| BH1833 | 285 | 1458 | 48.99635248 |
| BH1834 | 198 | 693  | 71.61572121 |
| BH1835 | 726 | 651  | 279.5323312 |
| BH1836 | 9   | 630  | 3.580786061 |
| BH1837 | 38  | 711  | 13.39647106 |

|        |      |      |             |
|--------|------|------|-------------|
| BH1838 | 1    | 690  | 0.363268151 |
| BH1839 | 6    | 1086 | 1.384834388 |
| fabF   | 10   | 2295 | 1.092178755 |
| BH1841 | 1    | 288  | 0.870329945 |
| BH1842 | 1    | 744  | 0.336901914 |
| BH1843 | 3    | 714  | 1.053172371 |
| fabH   | 4    | 1110 | 0.903261349 |
| BH1845 | 16   | 1845 | 2.173702107 |
| BH1846 | 3    | 240  | 3.133187803 |
| BH1847 | 7    | 801  | 2.190493345 |
| BH1848 | 6    | 1497 | 1.004629356 |
| BH1849 | 3    | 762  | 0.986830804 |
| fabZ   | 5    | 471  | 2.660881361 |
| BH1851 | 40   | 1209 | 8.292970198 |
| BH1852 | 98   | 645  | 38.08401919 |
| BH1853 | 1954 | 477  | 1026.79228  |
| BH1854 | 4690 | 1338 | 878.603934  |
| BH1855 | 62   | 981  | 15.84160194 |
| sacP   | 17   | 1377 | 3.094506472 |
| BH1857 | 35   | 960  | 9.138464425 |
| sacA   | 40   | 1464 | 6.84849793  |
| BH1859 | 93   | 729  | 31.97656688 |
| BH1860 | 129  | 414  | 78.10265248 |
| abfA   | 95   | 1503 | 15.84313194 |
| BH1862 | 17   | 1200 | 3.550946177 |
| BH1863 | 4    | 645  | 1.554449763 |
| BH1864 | 12   | 1386 | 2.17017337  |
| BH1865 | 5    | 930  | 1.347607657 |
| BH1866 | 1    | 858  | 0.292138723 |
| BH1867 | 17   | 984  | 4.330422167 |
| BH1868 | 17   | 492  | 8.660844334 |
| BH1869 | 75   | 942  | 19.95661021 |
| BH1870 | 107  | 1299 | 20.6467187  |
| araD   | 12   | 696  | 4.321638349 |
| araB   | 15   | 1692 | 2.222119009 |
| araA   | 11   | 1494 | 1.84551892  |
| BH1874 | 10   | 1497 | 1.674382259 |
| araR   | 143  | 1128 | 31.77630183 |
| BH1876 | 61   | 267  | 57.2657546  |
| BH1877 | 193  | 2277 | 21.24568278 |
| BH1878 | 61   | 2346 | 6.517458005 |

|        |      |      |             |
|--------|------|------|-------------|
| BH1879 | 52   | 1668 | 7.814185408 |
| BH1880 | 60   | 1086 | 13.84834388 |
| BH1881 | 98   | 1527 | 16.08656999 |
| BH1882 | 85   | 1338 | 15.92352546 |
| BH1883 | 57   | 1098 | 13.01214607 |
| BH1884 | 140  | 1602 | 21.90493345 |
| BH1885 | 9    | 756  | 2.983988384 |
| BH1886 | 6    | 450  | 3.34206699  |
| BH1887 | 12   | 870  | 3.457310679 |
| BH1888 | 186  | 588  | 79.2888342  |
| BH1889 | 43   | 978  | 11.02061968 |
| BH1890 | 68   | 501  | 34.02104121 |
| BH1891 | 121  | 930  | 32.6121053  |
| BH1892 | 31   | 453  | 17.15299283 |
| BH1893 | 239  | 519  | 115.4268801 |
| BH1894 | 3109 | 2091 | 372.6860212 |
| BH1895 | 0    | 471  | 0           |
| BH1896 | 183  | 1494 | 30.70272385 |
| BH1897 | 40   | 561  | 17.87201599 |
| BH1898 | 80   | 1398 | 14.34363515 |
| BH1899 | 51   | 300  | 42.61135412 |
| expZ   | 272  | 1617 | 42.16336833 |
| BH1901 | 0    | 714  | 0           |
| BH1902 | 1    | 288  | 0.870329945 |
| spoIIP | 11   | 1134 | 2.431397942 |
| BH1904 | 1    | 183  | 1.369699586 |
| BH1905 | 50   | 2322 | 5.39739501  |
| BH1906 | 656  | 900  | 182.6996621 |
| BH1907 | 1    | 711  | 0.352538712 |
| BH1908 | 617  | 2781 | 55.61098524 |
| BH1909 | 1    | 1794 | 0.13971852  |
| BH1910 | 3    | 1521 | 0.494388608 |
| lplB   | 0    | 960  | 0           |
| lplC   | 0    | 894  | 0           |
| BH1913 | 8    | 1656 | 1.210893837 |
| BH1914 | 520  | 660  | 197.4857767 |
| BH1915 | 7    | 282  | 6.221933226 |
| BH1916 | 6    | 156  | 9.640577855 |
| notB   | 43   | 831  | 12.97011557 |
| BH1918 | 229  | 513  | 111.8908393 |
| BH1919 | 2    | 72   | 6.962639562 |

|        |      |      |             |
|--------|------|------|-------------|
| BH1920 | 148  | 1647 | 22.52394875 |
| BH1921 | 65   | 381  | 42.76266818 |
| BH1922 | 116  | 1917 | 15.16744017 |
| bglA   | 13   | 1344 | 2.424490562 |
| BH1924 | 24   | 1281 | 4.696112866 |
| BH1925 | 3    | 918  | 0.819134066 |
| BH1926 | 5    | 858  | 1.460693614 |
| BH1927 | 2    | 606  | 0.827244304 |
| BH1928 | 84   | 1008 | 20.88791869 |
| BH1929 | 0    | 1218 | 0           |
| aprX   | 19   | 1335 | 3.567374877 |
| BH1931 | 19   | 915  | 5.204858427 |
| BH1932 | 14   | 1617 | 2.17017337  |
| thiC   | 52   | 1788 | 7.289743434 |
| gerKA  | 1    | 1548 | 0.16192185  |
| gerKC  | 4    | 1200 | 0.835516747 |
| gerKB  | 2    | 1122 | 0.4468004   |
| BH1937 | 92   | 897  | 25.70820761 |
| BH1938 | 59   | 633  | 23.36279057 |
| BH1939 | 2    | 960  | 0.522197967 |
| BH1940 | 85   | 1203 | 17.71045475 |
| BH1941 | 170  | 414  | 102.9259761 |
| BH1942 | 331  | 471  | 176.1503461 |
| BH1943 | 2090 | 972  | 538.9598772 |
| BH1944 | 1378 | 690  | 500.5835122 |
| BH1945 | 3070 | 1389 | 554.0035453 |
| BH1946 | 38   | 1218 | 7.820107489 |
| BH1947 | 174  | 342  | 127.5262404 |
| mgtE   | 639  | 978  | 163.7715342 |
| BH1949 | 13   | 762  | 4.276266818 |
| BH1950 | 32   | 888  | 9.032613486 |
| BH1951 | 5    | 1227 | 1.021414117 |
| BH1952 | 89   | 1092 | 20.42884355 |
| BH1953 | 18   | 888  | 5.080845086 |
| BH1954 | 0    | 132  | 0           |
| BH1955 | 0    | 483  | 0           |
| BH1956 | 1    | 1035 | 0.242178767 |
| BH1957 | 0    | 1125 | 0           |
| BH1958 | 124  | 1551 | 20.03947325 |
| BH1959 | 37   | 432  | 21.46813865 |
| BH1960 | 25   | 432  | 14.50549909 |

|        |     |      |             |
|--------|-----|------|-------------|
| BH1961 | 100 | 528  | 47.47254247 |
| BH1962 | 22  | 96   | 57.44177639 |
| BH1963 | 0   | 1215 | 0           |
| BH1964 | 0   | 627  | 0           |
| BH1965 | 7   | 591  | 2.968841235 |
| tetB   | 11  | 1380 | 1.997974831 |
| BH1967 | 7   | 612  | 2.866969232 |
| BH1968 | 31  | 462  | 16.81884362 |
| BH1969 | 1   | 360  | 0.696263956 |
| BH1970 | 4   | 879  | 1.140637198 |
| BH1971 | 0   | 459  | 0           |
| BH1972 | 0   | 309  | 0           |
| BH1973 | 3   | 723  | 1.040062341 |
| BH1974 | 8   | 1032 | 1.943062203 |
| BH1975 | 0   | 201  | 0           |
| BH1976 | 4   | 930  | 1.078086126 |
| BH1977 | 17  | 3165 | 1.346330304 |
| BH1978 | 5   | 474  | 2.64404034  |
| BH1979 | 10  | 276  | 9.081703777 |
| katB   | 2   | 2136 | 0.234695716 |
| hutP   | 84  | 444  | 47.4212208  |
| hutH   | 1   | 1536 | 0.163186865 |
| hutU   | 9   | 1680 | 1.342794773 |
| hutI   | 7   | 1281 | 1.369699586 |
| hutG   | 6   | 960  | 1.566593902 |
| BH1986 | 12  | 1320 | 2.278682039 |
| BH1987 | 0   | 1107 | 0           |
| BH1988 | 1   | 147  | 1.705136219 |
| BH1989 | 15  | 1515 | 2.481732913 |
| BH1990 | 1   | 537  | 0.466769133 |
| BH1991 | 0   | 567  | 0           |
| BH1992 | 1   | 1149 | 0.218150587 |
| BH1993 | 0   | 192  | 0           |
| BH1994 | 15  | 2208 | 1.702819458 |
| BH1995 | 0   | 864  | 0           |
| BH1996 | 1   | 780  | 0.321352595 |
| BH1997 | 3   | 1179 | 0.637799044 |
| BH1998 | 1   | 1230 | 0.203784573 |
| BH1999 | 0   | 417  | 0           |
| BH2000 | 1   | 960  | 0.261098984 |
| BH2001 | 0   | 486  | 0           |

|        |      |      |             |
|--------|------|------|-------------|
| BH2002 | 3    | 1116 | 0.673803829 |
| BH2003 | 3    | 585  | 1.285410381 |
| BH2004 | 6    | 1098 | 1.369699586 |
| BH2005 | 9    | 831  | 2.714675353 |
| BH2006 | 12   | 1542 | 1.950622757 |
| BH2007 | 0    | 1020 | 0           |
| BH2008 | 1    | 459  | 0.546089377 |
| BH2009 | 4    | 1515 | 0.661795444 |
| BH2010 | 2    | 1458 | 0.343834052 |
| BH2011 | 4    | 1101 | 0.910644956 |
| BH2012 | 18   | 357  | 12.63806845 |
| BH2013 | 235  | 2745 | 21.45862685 |
| BH2014 | 242  | 5451 | 11.12796108 |
| BH2015 | 11   | 582  | 4.737466094 |
| BH2016 | 75   | 1014 | 18.5395728  |
| BH2017 | 56   | 588  | 23.87190707 |
| lacR   | 28   | 993  | 7.067815386 |
| BH2019 | 11   | 1275 | 2.162513935 |
| BH2020 | 1    | 1257 | 0.199407338 |
| BH2021 | 3    | 852  | 0.882588114 |
| lacA   | 10   | 2070 | 1.210893837 |
| BH2023 | 6    | 2766 | 0.543720226 |
| BH2024 | 176  | 120  | 367.6273689 |
| BH2025 | 133  | 1620 | 20.57846804 |
| BH2026 | 29   | 540  | 13.46110315 |
| BH2027 | 184  | 1278 | 36.08804731 |
| BH2028 | 1200 | 432  | 696.2639562 |
| BH2029 | 50   | 1185 | 10.57616136 |
| BH2030 | 824  | 1299 | 158.99903   |
| BH2031 | 41   | 240  | 42.82023331 |
| BH2032 | 82   | 372  | 55.25191395 |
| BH2033 | 9    | 2019 | 1.117332946 |
| BH2034 | 4    | 2196 | 0.456566529 |
| BH2035 | 1    | 120  | 2.088791869 |
| tldD   | 2    | 1299 | 0.385919976 |
| BH2037 | 1    | 1260 | 0.198932559 |
| BH2038 | 4    | 1728 | 0.580219964 |
| BH2039 | 3    | 1257 | 0.598222015 |
| BH2040 | 4    | 2457 | 0.408066788 |
| BH2041 | 5    | 1131 | 1.108112397 |
| BH2042 | 7    | 2472 | 0.709783645 |

|        |      |      |             |
|--------|------|------|-------------|
| BH2043 | 8    | 2565 | 0.781770056 |
| BH2044 | 5    | 2292 | 0.546804154 |
| BH2045 | 7    | 1677 | 1.046264263 |
| BH2046 | 5    | 2490 | 0.503323342 |
| BH2047 | 8    | 2472 | 0.811181308 |
| BH2048 | 4    | 1917 | 0.523015178 |
| BH2049 | 3    | 669  | 1.124013562 |
| BH2050 | 2    | 534  | 0.938782862 |
| BH2051 | 4    | 762  | 1.315774405 |
| BH2052 | 20   | 510  | 9.829608794 |
| BH2053 | 1    | 183  | 1.369699586 |
| BH2054 | 1    | 1128 | 0.222211901 |
| BH2055 | 55   | 1974 | 6.9838026   |
| BH2056 | 0    | 564  | 0           |
| BH2057 | 9    | 603  | 3.741119765 |
| BH2058 | 6    | 726  | 2.071529126 |
| BH2059 | 51   | 486  | 26.30330501 |
| BH2060 | 7    | 705  | 2.48877329  |
| BH2061 | 95   | 450  | 52.91606067 |
| BH2062 | 89   | 546  | 40.8576871  |
| BH2063 | 3    | 345  | 2.179608906 |
| qoxA   | 149  | 990  | 37.72484708 |
| qoxB   | 291  | 1944 | 37.52089097 |
| qoxC   | 120  | 615  | 48.90829741 |
| qoxD   | 147  | 411  | 89.65033714 |
| BH2068 | 9    | 282  | 7.999628433 |
| BH2069 | 72   | 837  | 21.56172252 |
| BH2070 | 15   | 1857 | 2.024677094 |
| BH2071 | 2    | 834  | 0.601091185 |
| BH2072 | 1    | 795  | 0.315289339 |
| BH2073 | 0    | 1311 | 0           |
| BH2074 | 10   | 1461 | 1.715640139 |
| BH2075 | 1    | 933  | 0.268654903 |
| BH2076 | 1    | 882  | 0.28418937  |
| BH2077 | 5    | 825  | 1.519121359 |
| BH2078 | 3    | 735  | 1.023081732 |
| BH2079 | 6    | 1179 | 1.275598088 |
| wprA   | 3997 | 3159 | 317.1472402 |
| BH2081 | 9    | 426  | 5.295528681 |
| BH2082 | 17   | 1503 | 2.835086768 |
| BH2083 | 3    | 318  | 2.36467004  |

|        |     |      |             |
|--------|-----|------|-------------|
| BH2084 | 1   | 828  | 0.302723459 |
| BH2085 | 7   | 423  | 4.147955484 |
| BH2086 | 7   | 330  | 5.316924757 |
| BH2087 | 9   | 231  | 9.765780165 |
| BH2088 | 10  | 594  | 4.219781553 |
| BH2089 | 21  | 1113 | 4.72934008  |
| BH2090 | 28  | 1116 | 6.288835734 |
| BH2091 | 42  | 555  | 18.96848832 |
| BH2092 | 12  | 489  | 6.15104354  |
| BH2093 | 0   | 1173 | 0           |
| BH2094 | 22  | 699  | 7.888999332 |
| BH2095 | 192 | 615  | 78.25327586 |
| BH2096 | 145 | 1206 | 30.13679811 |
| BH2097 | 52  | 633  | 20.59093406 |
| BH2098 | 21  | 933  | 5.641752957 |
| BH2099 | 18  | 1260 | 3.580786061 |
| BH2100 | 99  | 1101 | 22.53846267 |
| gdhA   | 882 | 1377 | 160.550277  |
| gltC   | 46  | 906  | 12.72641403 |
| BH2103 | 122 | 567  | 53.93282709 |
| BH2104 | 149 | 612  | 61.02548793 |
| BH2105 | 5   | 1167 | 1.073928981 |
| BH2106 | 0   | 111  | 0           |
| BH2107 | 1   | 552  | 0.454085189 |
| BH2108 | 2   | 645  | 0.777224881 |
| BH2109 | 11  | 1578 | 1.747278369 |
| BH2110 | 14  | 1758 | 1.996115096 |
| BH2111 | 3   | 1686 | 0.446005381 |
| BH2112 | 0   | 1014 | 0           |
| BH2113 | 1   | 927  | 0.270393769 |
| BH2114 | 2   | 2115 | 0.237026028 |
| BH2115 | 1   | 210  | 1.193595354 |
| BH2116 | 3   | 861  | 0.873362454 |
| BH2117 | 11  | 873  | 3.158310729 |
| BH2118 | 22  | 1068 | 5.163305743 |
| BH2119 | 9   | 486  | 4.641759708 |
| BH2120 | 9   | 1191 | 1.894118571 |
| BH2121 | 41  | 546  | 18.82208057 |
| BH2122 | 67  | 780  | 21.53062388 |
| BH2123 | 12  | 672  | 4.475982576 |
| BH2124 | 3   | 396  | 1.898901699 |



|        |      |      |             |
|--------|------|------|-------------|
| sinR   | 99   | 339  | 73.20013982 |
| BH2126 | 22   | 132  | 41.77583737 |
| BH2127 | 30   | 585  | 12.85410381 |
| BH2128 | 14   | 615  | 5.705968032 |
| cotN   | 78   | 633  | 30.88640109 |
| sipW   | 54   | 576  | 23.49890852 |
| BH2131 | 40   | 825  | 12.15297087 |
| BH2132 | 0    | 231  | 0           |
| BH2133 | 27   | 2184 | 3.098757168 |
| BH2134 | 10   | 1125 | 2.22804466  |
| BH2135 | 14   | 1356 | 2.587883731 |
| BH2136 | 8    | 1326 | 1.512247507 |
| BH2137 | 307  | 756  | 101.7871593 |
| BH2138 | 88   | 480  | 45.95342111 |
| BH2139 | 1264 | 2451 | 129.2647697 |
| BH2140 | 750  | 1968 | 95.52401838 |
| BH2141 | 224  | 414  | 135.6201097 |
| BH2142 | 156  | 639  | 61.19277587 |
| BH2143 | 0    | 126  | 0           |
| BH2144 | 6    | 774  | 1.943062203 |
| BH2145 | 20   | 582  | 8.613574716 |
| BH2146 | 97   | 2472 | 9.835573362 |
| BH2147 | 52   | 177  | 73.63876418 |
| BH2148 | 137  | 324  | 105.9868467 |
| BH2149 | 388  | 1518 | 64.0672921  |
| BH2150 | 13   | 312  | 10.44395934 |
| BH2151 | 5    | 267  | 4.693914312 |
| BH2152 | 17   | 498  | 8.556496811 |
| BH2153 | 7    | 453  | 3.873256445 |
| BH2154 | 1    | 270  | 0.928351942 |
| BH2155 | 901  | 804  | 280.8957423 |
| bcaT   | 848  | 1077 | 197.3588306 |
| BH2157 | 136  | 543  | 62.77915893 |
| BH2158 | 407  | 831  | 122.7636521 |
| BH2159 | 8    | 150  | 13.36826796 |
| BH2160 | 28   | 384  | 18.27692885 |
| BH2161 | 104  | 1434 | 18.17860706 |
| BH2162 | 121  | 819  | 37.03206097 |
| BH2163 | 259  | 1395 | 46.53738443 |
| BH2164 | 38   | 462  | 20.61664702 |
| BH2165 | 81   | 1047 | 19.39164944 |

|        |      |      |             |
|--------|------|------|-------------|
| kduI   | 58   | 831  | 17.4945745  |
| kduD   | 83   | 753  | 27.62864145 |
| BH2168 | 27   | 780  | 8.67652007  |
| BH2169 | 106  | 714  | 37.21209043 |
| BH2170 | 18   | 630  | 7.161572121 |
| BH2171 | 16   | 1368 | 2.93163771  |
| BH2172 | 7    | 357  | 4.914804397 |
| BH2173 | 63   | 336  | 46.99781705 |
| BH2174 | 122  | 615  | 49.7234357  |
| BH2175 | 147  | 984  | 37.44541521 |
| BH2176 | 57   | 438  | 32.61948946 |
| BH2177 | 15   | 336  | 11.18995644 |
| BH2178 | 280  | 1152 | 60.92309617 |
| clpE   | 102  | 2136 | 11.96948149 |
| BH2180 | 77   | 912  | 21.16275972 |
| BH2181 | 110  | 831  | 33.17936542 |
| BH2182 | 257  | 255  | 252.620946  |
| isp    | 39   | 969  | 10.08828271 |
| BH2184 | 1    | 165  | 1.519121359 |
| BH2185 | 0    | 90   | 0           |
| BH2186 | 12   | 1110 | 2.709784046 |
| BH2187 | 5    | 1077 | 1.16367235  |
| gerAA  | 2    | 1233 | 0.406577493 |
| BH2189 | 117  | 795  | 36.88885262 |
| BH2190 | 41   | 846  | 12.14758392 |
| cotW   | 4    | 210  | 4.774381414 |
| cotX   | 15   | 483  | 7.784317523 |
| BH2193 | 247  | 780  | 79.37409101 |
| BH2194 | 344  | 873  | 98.76899008 |
| BH2195 | 237  | 1212 | 49.01422504 |
| BH2196 | 41   | 108  | 95.15607402 |
| BH2197 | 211  | 381  | 138.8141998 |
| BH2198 | 21   | 267  | 19.71444011 |
| BH2199 | 0    | 69   | 0           |
| BH2200 | 39   | 999  | 9.785331277 |
| BH2201 | 20   | 564  | 8.888476037 |
| BH2202 | 27   | 633  | 10.69144653 |
| BH2203 | 175  | 204  | 215.0226924 |
| BH2204 | 0    | 1215 | 0           |
| BH2205 | 1435 | 1236 | 291.0112943 |
| BH2206 | 3353 | 2838 | 296.140344  |

|        |      |      |             |
|--------|------|------|-------------|
| BH2207 | 22   | 462  | 11.93595354 |
| BH2208 | 3    | 843  | 0.892010762 |
| BH2209 | 10   | 1836 | 1.365223444 |
| BH2210 | 19   | 735  | 6.479517633 |
| BH2211 | 21   | 1011 | 5.206484183 |
| BH2212 | 7    | 348  | 5.041911407 |
| BH2213 | 32   | 654  | 12.26446602 |
| BH2214 | 62   | 1437 | 10.81462178 |
| BH2215 | 31   | 969  | 8.018891384 |
| BH2216 | 3774 | 1413 | 669.4777505 |
| BH2217 | 77   | 279  | 69.17719307 |
| BH2218 | 52   | 813  | 16.03205567 |
| degA   | 124  | 1008 | 30.83454663 |
| BH2220 | 10   | 1038 | 2.414788287 |
| BH2221 | 6    | 1038 | 1.448872972 |
| BH2222 | 6    | 1743 | 0.862840015 |
| BH2223 | 13   | 2247 | 1.450162579 |
| amyC   | 3    | 831  | 0.904891784 |
| amyD   | 8    | 915  | 2.191519338 |
| msmE   | 12   | 1275 | 2.359106111 |
| msmR   | 22   | 1044 | 5.282002427 |
| melA   | 39   | 1305 | 7.490839805 |
| BH2229 | 3    | 864  | 0.870329945 |
| BH2230 | 940  | 3276 | 71.9217713  |
| BH2231 | 332  | 1449 | 57.43096484 |
| BH2232 | 122  | 1035 | 29.54580962 |
| BH2233 | 183  | 1374 | 33.38418445 |
| BH2234 | 77   | 945  | 20.42374272 |
| BH2235 | 7    | 195  | 8.997872665 |
| BH2236 | 374  | 642  | 146.0202166 |
| gapN   | 766  | 1446 | 132.7812922 |
| BH2238 | 173  | 483  | 89.77912877 |
| BH2239 | 218  | 633  | 86.32353126 |
| BH2240 | 13   | 615  | 5.298398886 |
| BH2241 | 305  | 498  | 153.5136193 |
| BH2242 | 397  | 711  | 139.9578687 |
| BH2243 | 222  | 423  | 131.5494453 |
| BH2244 | 347  | 672  | 129.4304961 |
| BH2245 | 573  | 1233 | 116.4844517 |
| BH2246 | 4    | 231  | 4.34034674  |
| BH2247 | 12   | 633  | 4.751754014 |

|        |      |      |             |
|--------|------|------|-------------|
| BH2248 | 58   | 1158 | 12.55439672 |
| BH2249 | 51   | 531  | 24.07421137 |
| BH2250 | 160  | 1338 | 29.97369498 |
| BH2251 | 36   | 228  | 39.57710909 |
| BH2252 | 65   | 288  | 56.57144644 |
| BH2253 | 38   | 522  | 18.24691747 |
| BH2254 | 0    | 114  | 0           |
| BH2255 | 19   | 1407 | 3.384822644 |
| BH2256 | 2    | 273  | 1.836300544 |
| BH2257 | 29   | 807  | 9.00742962  |
| BH2258 | 11   | 672  | 4.102984028 |
| BH2259 | 4    | 678  | 1.478790703 |
| BH2260 | 4    | 1338 | 0.749342374 |
| BH2261 | 194  | 213  | 228.2961254 |
| cheV   | 1345 | 918  | 367.2451063 |
| BH2263 | 93   | 1422 | 16.39305011 |
| BH2264 | 41   | 696  | 14.76559769 |
| BH2265 | 196  | 1266 | 38.80599111 |
| BH2266 | 5    | 267  | 4.693914312 |
| BH2267 | 156  | 999  | 39.14132511 |
| BH2268 | 45   | 324  | 34.81319781 |
| BH2269 | 627  | 738  | 212.9548783 |
| BH2270 | 131  | 786  | 41.77583737 |
| BH2271 | 120  | 933  | 32.23858833 |
| BH2272 | 77   | 435  | 44.36882038 |
| BH2273 | 95   | 330  | 72.15826455 |
| BH2274 | 161  | 309  | 130.6001906 |
| BH2275 | 966  | 2016 | 120.1055324 |
| BH2276 | 391  | 1179 | 83.12647538 |
| BH2277 | 804  | 1218 | 165.4570111 |
| BH2278 | 119  | 630  | 47.34594902 |
| BH2279 | 7    | 858  | 2.04497106  |
| BH2280 | 53   | 912  | 14.56657487 |
| BH2281 | 2    | 222  | 2.258153372 |
| BH2282 | 13   | 411  | 7.928261107 |
| BH2283 | 582  | 873  | 167.1033495 |
| BH2284 | 270  | 483  | 140.1177154 |
| nadE   | 388  | 819  | 118.7474352 |
| BH2286 | 66   | 318  | 52.02274088 |
| BH2287 | 145  | 231  | 157.3375693 |
| BH2288 | 361  | 432  | 209.4594068 |

|        |       |      |             |
|--------|-------|------|-------------|
| spoVK  | 1131  | 2328 | 121.7744126 |
| BH2290 | 2584  | 1608 | 402.7938947 |
| BH2291 | 824   | 570  | 362.350421  |
| BH2292 | 63    | 1281 | 12.32729627 |
| BH2293 | 26    | 639  | 10.19879598 |
| BH2294 | 56    | 492  | 28.52984016 |
| BH2295 | 1     | 141  | 1.777695207 |
| BH2296 | 0     | 138  | 0           |
| BH2297 | 1     | 699  | 0.358590879 |
| BH2298 | 0     | 150  | 0           |
| citB   | 6004  | 2724 | 552.4716467 |
| cotK   | 16    | 162  | 24.75605178 |
| BH2301 | 19    | 138  | 34.51047435 |
| BH2302 | 832   | 489  | 426.4723521 |
| BH2303 | 5     | 822  | 1.524665598 |
| BH2304 | 10    | 948  | 2.64404034  |
| BH2305 | 18    | 1509 | 2.989920766 |
| BH2306 | 17    | 837  | 5.090962261 |
| BH2307 | 88    | 339  | 65.06679095 |
| BH2308 | 1     | 1413 | 0.177392091 |
| BH2309 | 1     | 1317 | 0.190322722 |
| iolH   | 23    | 885  | 6.51419837  |
| BH2311 | 46    | 1176 | 9.804533261 |
| BH2312 | 106   | 1458 | 18.22320478 |
| BH2313 | 63    | 1014 | 15.57324115 |
| BH2314 | 39    | 867  | 11.2751395  |
| iolI   | 18    | 849  | 5.314240797 |
| iolG   | 12    | 1047 | 2.872836954 |
| iolE   | 13    | 912  | 3.57293346  |
| iolD   | 29    | 1914 | 3.797803398 |
| iolC   | 19    | 996  | 4.781571748 |
| iolB   | 6     | 813  | 1.849852577 |
| BH2321 | 2     | 975  | 0.514164152 |
| BH2322 | 0     | 1569 | 0           |
| BH2323 | 13    | 972  | 3.352382011 |
| BH2324 | 5     | 255  | 4.914804397 |
| BH2325 | 1314  | 540  | 609.9272257 |
| BH2326 | 889   | 366  | 608.831466  |
| BH2327 | 538   | 195  | 691.5507848 |
| BH2328 | 533   | 327  | 408.5600242 |
| ald    | 10256 | 1137 | 2260.965636 |

|        |      |      |             |
|--------|------|------|-------------|
| BH2330 | 162  | 420  | 96.68122364 |
| BH2331 | 157  | 798  | 49.31433434 |
| BH2332 | 435  | 456  | 239.1117008 |
| BH2333 | 166  | 510  | 81.58575299 |
| BH2334 | 5    | 156  | 8.03381488  |
| BH2335 | 112  | 1800 | 15.59631262 |
| BH2336 | 80   | 1758 | 11.40637198 |
| BH2337 | 18   | 342  | 13.1923697  |
| BH2338 | 35   | 444  | 19.758842   |
| BH2339 | 37   | 318  | 29.16426383 |
| BH2340 | 10   | 456  | 5.496820707 |
| BH2341 | 119  | 816  | 36.5538577  |
| BH2342 | 0    | 285  | 0           |
| BH2343 | 0    | 786  | 0           |
| BH2344 | 379  | 900  | 105.5536158 |
| BH2345 | 139  | 264  | 131.9736681 |
| BH2346 | 136  | 405  | 84.17057604 |
| BH2347 | 15   | 525  | 7.161572121 |
| BH2348 | 4    | 390  | 2.570820761 |
| BH2349 | 7    | 672  | 2.610989836 |
| BH2350 | 663  | 219  | 758.8323337 |
| BH2351 | 8    | 441  | 4.547029918 |
| tkr    | 3284 | 2001 | 411.3698649 |
| BH2353 | 157  | 240  | 163.9701617 |
| BH2354 | 129  | 654  | 49.44112863 |
| BH2355 | 31   | 204  | 38.08973408 |
| lexA   | 414  | 624  | 166.299968  |
| BH2357 | 10   | 249  | 10.06646684 |
| BH2358 | 1    | 513  | 0.488606285 |
| BH2359 | 0    | 189  | 0           |
| glnA   | 4471 | 1350 | 830.1323062 |
| BH2361 | 489  | 1278 | 95.90790834 |
| BH2362 | 339  | 1257 | 67.59908768 |
| BH2363 | 59   | 948  | 15.59983801 |
| BH2364 | 83   | 1137 | 18.29759632 |
| BH2365 | 379  | 237  | 400.8365156 |
| miaA   | 574  | 945  | 152.2497184 |
| BH2367 | 706  | 771  | 229.5232777 |
| mulT   | 1273 | 1914 | 166.7104733 |
| mutS   | 1124 | 2598 | 108.4435132 |
| cotE   | 46   | 564  | 20.44349488 |

|         |       |      |             |
|---------|-------|------|-------------|
| BH2371  | 596   | 441  | 338.7537289 |
| BH2372  | 1332  | 1617 | 206.4764949 |
| BH2373  | 891   | 867  | 257.5935716 |
| BH2374  | 932   | 1740 | 134.258898  |
| spoVS   | 457   | 261  | 438.8863834 |
| BH2376  | 778   | 795  | 245.2951055 |
| BH2377  | 0     | 1215 | 0           |
| BH2378  | 16080 | 1566 | 2573.775728 |
| BH2379  | 229   | 666  | 86.18618701 |
| BH2380  | 72    | 252  | 71.61572121 |
| BH2381  | 422   | 1413 | 74.8594623  |
| BH2382  | 255   | 999  | 63.98101219 |
| recA    | 1832  | 1050 | 437.3333375 |
| BH2384  | 3863  | 1620 | 597.7039251 |
| cinA    | 3845  | 1263 | 763.0788347 |
| pgsA    | 1175  | 579  | 508.6695224 |
| BH2387  | 1212  | 495  | 613.7250291 |
| BH2388  | 909   | 852  | 267.4241984 |
| BH2389  | 723   | 774  | 234.1389955 |
| BH2390  | 135   | 255  | 132.6997187 |
| BH2391  | 296   | 729  | 101.7748795 |
| BH2392  | 512   | 1299 | 98.79551379 |
| BH2393  | 624   | 1296 | 120.6857524 |
| BH2394  | 364   | 729  | 125.1555951 |
| spoIIIE | 979   | 2370 | 103.5406197 |
| BH2396  | 13    | 222  | 14.67799692 |
| BH2397  | 43    | 771  | 13.97946309 |
| BH2398  | 5398  | 1668 | 811.1725545 |
| dapA    | 1035  | 879  | 295.139875  |
| dapG    | 2464  | 1236 | 499.6876859 |
| asd     | 1139  | 1050 | 271.9010215 |
| spoVFB  | 5     | 594  | 2.109890776 |
| spoVFA  | 11    | 879  | 3.136752294 |
| BH2404  | 11    | 249  | 11.07311352 |
| BH2405  | 1274  | 1242 | 257.1131247 |
| BH2406  | 1270  | 972  | 327.501935  |
| pnpA    | 9318  | 2115 | 1104.304263 |
| rpsO    | 15541 | 270  | 14427.51752 |
| ribC    | 499   | 942  | 132.7779799 |
| truB    | 594   | 915  | 162.7203108 |
| rbfA    | 701   | 351  | 500.5959316 |

|        |       |      |             |
|--------|-------|------|-------------|
| BH2412 | 855   | 282  | 759.9647012 |
| infB   | 6371  | 2193 | 728.1911352 |
| BH2414 | 668   | 306  | 547.1815562 |
| BH2415 | 674   | 276  | 612.1068346 |
| nusA   | 2318  | 1149 | 505.6730602 |
| BH2417 | 649   | 471  | 345.3824007 |
| polC   | 4050  | 4302 | 235.9723032 |
| proS   | 2846  | 1710 | 417.1720462 |
| BH2420 | 1317  | 1263 | 261.3718661 |
| BH2421 | 788   | 1098 | 179.8872123 |
| cdsA   | 246   | 795  | 77.56117731 |
| uppS   | 658   | 771  | 213.9182957 |
| frr    | 2393  | 558  | 1074.941708 |
| smbA   | 3299  | 720  | 1148.487396 |
| tsf    | 10479 | 882  | 2978.020407 |
| rpsB   | 17225 | 735  | 5874.194276 |
| BH2428 | 277   | 501  | 138.585712  |
| BH2429 | 244   | 312  | 196.0250831 |
| BH2430 | 1282  | 1383 | 232.3497766 |
| sigD   | 631   | 771  | 205.1404933 |
| BH2432 | 341   | 324  | 263.8066767 |
| cheD   | 586   | 489  | 300.3759595 |
| cheC   | 621   | 630  | 247.0742382 |
| cheB   | 1158  | 1041 | 278.8266264 |
| BH2436 | 916   | 867  | 264.8212252 |
| flhF   | 916   | 1128 | 203.5461012 |
| flhA   | 1618  | 2034 | 199.3902799 |
| flhB   | 453   | 1092 | 103.9805183 |
| fliR   | 303   | 777  | 97.74578165 |
| fliQ   | 106   | 270  | 98.40530581 |
| fliP   | 821   | 702  | 293.1449785 |
| fliZ   | 1195  | 687  | 436.0010975 |
| cheY   | 976   | 366  | 668.413398  |
| fliY   | 2263  | 1206 | 470.3418904 |
| fliM   | 1180  | 993  | 297.8579341 |
| fliL   | 450   | 432  | 261.0989836 |
| BH2448 | 221   | 213  | 260.0692975 |
| flgE   | 1228  | 792  | 388.641881  |
| BH2450 | 476   | 399  | 299.0270465 |
| BH2451 | 1119  | 516  | 543.5716514 |
| BH2452 | 3265  | 1197 | 683.6997946 |



|        |       |      |             |
|--------|-------|------|-------------|
| BH2453 | 964   | 570  | 423.9148129 |
| fliJ   | 651   | 441  | 370.0145596 |
| fliI   | 1680  | 1314 | 320.4721771 |
| fliH   | 1085  | 801  | 339.5264685 |
| fliG   | 1317  | 1008 | 327.4927251 |
| fliF   | 2117  | 1578 | 336.2716643 |
| fliE   | 202   | 309  | 163.8586243 |
| flgC   | 403   | 459  | 220.0740191 |
| flgB   | 225   | 399  | 141.3468182 |
| codY   | 963   | 780  | 309.4625492 |
| clpY   | 1620  | 1395 | 291.083254  |
| clpQ   | 442   | 543  | 204.0322665 |
| codV   | 589   | 912  | 161.8813698 |
| gid    | 736   | 1308 | 141.0413592 |
| topA   | 2579  | 2073 | 311.837582  |
| smf    | 138   | 909  | 38.053238   |
| sucD   | 2663  | 909  | 734.3171942 |
| sucC   | 3045  | 1161 | 657.4027122 |
| BH2471 | 2     | 186  | 2.695215314 |
| BH2472 | 0     | 1215 | 0           |
| BH2473 | 104   | 279  | 93.4341309  |
| BH2474 | 875   | 1728 | 126.923117  |
| rnh    | 308   | 792  | 97.47695387 |
| BH2476 | 883   | 855  | 258.8636098 |
| BH2477 | 0     | 1215 | 0           |
| rplS   | 9154  | 345  | 6650.71331  |
| trmD   | 1103  | 741  | 373.1072763 |
| BH2480 | 509   | 522  | 244.4126577 |
| BH2481 | 472   | 417  | 283.7150394 |
| BH2482 | 14066 | 231  | 15262.82931 |
| rpsP   | 5033  | 273  | 4621.050319 |
| ffh    | 8281  | 1356 | 1530.733227 |
| BH2485 | 2167  | 330  | 1645.967993 |
| ftsY   | 592   | 993  | 149.433811  |
| smc    | 1362  | 3567 | 95.70847856 |
| BH2488 | 24    | 222  | 27.09784046 |
| rncS   | 948   | 792  | 300.0264684 |
| acpA   | 2851  | 234  | 3053.92083  |
| fabG   | 4163  | 741  | 1408.200899 |
| fabD   | 4041  | 942  | 1075.262158 |
| plsX   | 3453  | 1014 | 853.5619317 |

|        |      |      |             |
|--------|------|------|-------------|
| BH2494 | 1721 | 561  | 768.9434879 |
| recG   | 737  | 2022 | 91.36140102 |
| BH2496 | 259  | 888  | 73.1077154  |
| BH2497 | 221  | 663  | 83.55167475 |
| BH2498 | 2825 | 1674 | 422.9990702 |
| BH2499 | 263  | 363  | 181.6040534 |
| rpmB   | 9395 | 189  | 12459.80927 |
| BH2501 | 6    | 81   | 18.56703883 |
| rpe    | 296  | 651  | 113.9691047 |
| BH2503 | 337  | 885  | 95.44716742 |
| BH2504 | 2285 | 1995 | 287.0910929 |
| BH2505 | 944  | 750  | 315.4911238 |
| BH2506 | 813  | 1089 | 187.128131  |
| BH2507 | 767  | 1353 | 142.0934247 |
| fmt    | 339  | 954  | 89.06923817 |
| priA   | 836  | 2415 | 86.76919266 |
| dfp    | 523  | 1215 | 107.8951257 |
| rpoZ   | 402  | 207  | 486.7793224 |
| gmk    | 976  | 615  | 397.7874856 |
| BH2513 | 761  | 264  | 722.5320964 |
| BH2514 | 792  | 885  | 224.3150047 |
| pacL   | 326  | 2709 | 30.16372754 |
| BH2516 | 245  | 1713 | 35.8496678  |
| BH2517 | 6    | 354  | 4.248390241 |
| BH2518 | 15   | 450  | 8.355167475 |
| BH2519 | 128  | 666  | 48.17393859 |
| BH2520 | 236  | 567  | 104.3290753 |
| BH2521 | 335  | 522  | 160.860983  |
| BH2522 | 301  | 306  | 246.5593539 |
| BH2523 | 716  | 1659 | 108.1790219 |
| BH2524 | 0    | 945  | 0           |
| BH2525 | 10   | 324  | 7.73626618  |
| narA   | 212  | 1017 | 52.25060486 |
| narQ   | 138  | 813  | 42.54660928 |
| BH2528 | 40   | 1260 | 7.957302357 |
| BH2529 | 12   | 249  | 12.0797602  |
| BH2530 | 300  | 2349 | 32.01213592 |
| BH2531 | 162  | 663  | 61.24602402 |
| pyrE   | 30   | 633  | 11.87938504 |
| pyrF   | 54   | 705  | 19.19910824 |
| pyrD   | 56   | 918  | 15.29050257 |

|          |      |      |             |
|----------|------|------|-------------|
| pyrDII   | 32   | 780  | 10.28328305 |
| pyrAB    | 102  | 3189 | 8.017187981 |
| pyrAA    | 37   | 1089 | 8.516286407 |
| pyrC     | 32   | 1287 | 6.232292755 |
| pyrB     | 15   | 918  | 4.095670331 |
| pyrP     | 49   | 1335 | 9.200072051 |
| pyrR     | 269  | 543  | 124.1734835 |
| BH2542   | 384  | 918  | 104.8491605 |
| lsp      | 170  | 471  | 90.46996629 |
| BH2544   | 20   | 663  | 7.561237534 |
| ileS     | 3905 | 2766 | 353.8712472 |
| divIVA   | 1247 | 498  | 627.6442073 |
| BH2547   | 3161 | 777  | 1019.717544 |
| BH2548   | 934  | 255  | 918.0854613 |
| BH2549   | 1256 | 450  | 699.6060232 |
| BH2550   | 1575 | 687  | 574.6457979 |
| BH2551   | 1336 | 822  | 407.3906477 |
| BH2552   | 0    | 282  | 0           |
| BH2553   | 31   | 798  | 9.737225253 |
| sigG     | 11   | 786  | 3.507894741 |
| BH2555   | 0    | 87   | 0           |
| sigE     | 4    | 714  | 1.404229828 |
| spoIIIGA | 7    | 918  | 1.911312821 |
| ftsZ     | 3516 | 1149 | 767.0174632 |
| ftsA     | 3500 | 1278 | 686.4574216 |
| sbp      | 224  | 354  | 158.606569  |
| BH2561   | 881  | 708  | 311.9026502 |
| BH2562   | 673  | 723  | 233.3206519 |
| divIB    | 501  | 789  | 159.1611751 |
| murB     | 676  | 906  | 187.0229541 |
| murG     | 755  | 1092 | 173.3008638 |
| spoVE    | 876  | 1101 | 199.4312454 |
| murD     | 1903 | 1353 | 352.5473105 |
| mraY     | 358  | 744  | 120.6108853 |
| BH2569   | 110  | 294  | 93.78249206 |
| murF     | 911  | 1359 | 168.0255534 |
| murE     | 711  | 1461 | 121.9820139 |
| spoVD    | 881  | 1935 | 114.1225201 |
| pbpB     | 1309 | 2172 | 151.0623512 |
| BH2574   | 317  | 363  | 218.8915776 |
| BH2575   | 684  | 933  | 183.7599535 |

|        |      |      |             |
|--------|------|------|-------------|
| BH2576 | 302  | 432  | 175.226429  |
| BH2577 | 317  | 1617 | 49.13892559 |
| BH2578 | 34   | 387  | 22.02137164 |
| apbA   | 168  | 927  | 45.42615326 |
| BH2580 | 202  | 510  | 99.27904882 |
| BH2581 | 146  | 642  | 57.00254445 |
| BH2582 | 112  | 756  | 37.13407767 |
| rpmF   | 3098 | 174  | 4462.811868 |
| BH2584 | 1950 | 510  | 958.3868574 |
| BH2585 | 239  | 1251 | 47.88693109 |
| BH2586 | 261  | 1050 | 62.30567745 |
| BH2587 | 162  | 828  | 49.0412004  |
| BH2588 | 171  | 1236 | 34.67800093 |
| kdtB   | 155  | 498  | 78.01511799 |
| BH2590 | 190  | 570  | 83.55167475 |
| BH2591 | 31   | 390  | 19.9238609  |
| BH2592 | 205  | 1230 | 41.77583737 |
| BH2593 | 5    | 324  | 3.86813309  |
| BH2594 | 105  | 279  | 94.33253601 |
| BH2595 | 68   | 315  | 54.10965603 |
| BH2596 | 616  | 444  | 347.7556192 |
| BH2597 | 19   | 969  | 4.914804397 |
| BH2598 | 58   | 774  | 18.78293463 |
| BH2599 | 21   | 435  | 12.10058738 |
| BH2600 | 1    | 234  | 1.071175317 |
| BH2601 | 1    | 420  | 0.596797677 |
| BH2602 | 371  | 507  | 183.4181736 |
| BH2603 | 258  | 1293 | 50.01469161 |
| BH2604 | 94   | 1092 | 21.57653139 |
| BH2605 | 10   | 429  | 5.842774458 |
| BH2606 | 588  | 351  | 419.9007244 |
| BH2607 | 3    | 54   | 13.92527912 |
| BH2608 | 186  | 1059 | 44.02439519 |
| BH2609 | 81   | 297  | 68.36046116 |
| BH2610 | 74   | 198  | 93.67915047 |
| BH2611 | 466  | 558  | 209.3283894 |
| ctaF   | 898  | 345  | 652.4295993 |
| ctaE   | 2370 | 621  | 956.6061312 |
| ctaD   | 5024 | 1863 | 675.9478485 |
| ctaC   | 3316 | 1047 | 793.8606116 |
| ctaB   | 1551 | 939  | 414.0212381 |

|        |      |      |             |
|--------|------|------|-------------|
| ctaA   | 213  | 897  | 59.52008937 |
| BH2618 | 11   | 1806 | 1.526691731 |
| BH2619 | 10   | 1206 | 2.078399869 |
| BH2620 | 5    | 1293 | 0.969276969 |
| BH2621 | 2    | 594  | 0.843956311 |
| BH2622 | 24   | 1797 | 3.347646401 |
| ddc    | 12   | 1527 | 1.96978408  |
| BH2624 | 6    | 1365 | 1.101780326 |
| pycA   | 4696 | 3453 | 340.8850257 |
| BH2626 | 667  | 282  | 592.8613517 |
| BH2627 | 5    | 927  | 1.351968847 |
| BH2628 | 67   | 510  | 32.92918946 |
| BH2629 | 46   | 1329 | 8.675794669 |
| BH2630 | 171  | 456  | 93.99563409 |
| BH2631 | 1477 | 342  | 1082.507225 |
| BH2632 | 5185 | 1845 | 704.4153391 |
| BH2633 | 91   | 186  | 122.6322968 |
| BH2634 | 455  | 900  | 126.72004   |
| BH2635 | 325  | 804  | 101.3219936 |
| BH2636 | 2    | 189  | 2.652434119 |
| BH2637 | 182  | 642  | 71.05796637 |
| BH2638 | 83   | 267  | 77.91897757 |
| BH2639 | 325  | 978  | 83.29538127 |
| cad    | 216  | 1476 | 36.68122306 |
| BH2641 | 0    | 1215 | 0           |
| BH2642 | 125  | 411  | 76.23327988 |
| BH2643 | 277  | 1089 | 63.7570631  |
| BH2644 | 1016 | 1065 | 239.1225396 |
| opuD   | 760  | 1515 | 125.7411343 |
| slp    | 94   | 468  | 50.34523991 |
| BH2647 | 30   | 372  | 20.21411486 |
| BH2648 | 47   | 690  | 17.0736031  |
| BH2649 | 43   | 825  | 13.06444369 |
| BH2650 | 67   | 1161 | 14.46501863 |
| BH2651 | 0    | 1215 | 0           |
| pdhD   | 7678 | 1410 | 1364.91438  |
| pdhC   | 7324 | 1281 | 1433.09711  |
| pdhB   | 4941 | 978  | 1266.346089 |
| pdhA   | 5354 | 1086 | 1235.733886 |
| BH2656 | 2    | 645  | 0.777224881 |
| BH2657 | 0    | 213  | 0           |

|        |      |      |             |
|--------|------|------|-------------|
| BH2658 | 207  | 549  | 94.50927144 |
| BH2659 | 339  | 774  | 109.7830145 |
| BH2660 | 0    | 138  | 0           |
| BH2661 | 39   | 210  | 46.55021879 |
| BH2662 | 1351 | 1668 | 203.0185478 |
| BH2663 | 385  | 663  | 145.5538225 |
| BH2664 | 1023 | 450  | 569.8224218 |
| BH2665 | 4141 | 552  | 1880.366767 |
| BH2666 | 72   | 831  | 21.71740282 |
| BH2667 | 214  | 249  | 215.4223903 |
| BH2668 | 562  | 1116 | 126.2259172 |
| BH2669 | 1789 | 723  | 620.2238428 |
| BH2670 | 93   | 897  | 25.98764465 |
| BH2671 | 20   | 1281 | 3.913427389 |
| BH2672 | 2    | 552  | 0.908170378 |
| BH2673 | 38   | 1047 | 9.097317021 |
| BH2674 | 104  | 897  | 29.06145209 |
| BH2675 | 15   | 864  | 4.351649726 |
| gntK   | 30   | 1503 | 5.003094296 |
| BH2677 | 39   | 1284 | 7.61335354  |
| BH2678 | 157  | 1284 | 30.64862835 |
| tenA   | 36   | 675  | 13.36826796 |
| BH2680 | 43   | 750  | 14.37088806 |
| BH2681 | 30   | 753  | 9.986255946 |
| BH2682 | 61   | 993  | 15.39774066 |
| BH2683 | 192  | 1140 | 42.21558303 |
| BH2684 | 0    | 333  | 0           |
| BH2685 | 2    | 456  | 1.099364141 |
| BH2686 | 5    | 159  | 7.882233467 |
| BH2687 | 15   | 543  | 6.92417194  |
| BH2688 | 61   | 1146 | 13.34202136 |
| BH2689 | 252  | 840  | 75.19650727 |
| BH2690 | 249  | 750  | 83.21746805 |
| BH2691 | 5    | 144  | 8.703299453 |
| BH2692 | 291  | 801  | 91.06193765 |
| BH2693 | 10   | 390  | 6.427051904 |
| BH2694 | 24   | 1257 | 4.785776119 |
| BH2695 | 20   | 1389 | 3.609143618 |
| BH2696 | 0    | 1356 | 0           |
| BH2697 | 10   | 402  | 6.235199608 |
| BH2698 | 81   | 1569 | 12.94012553 |

|          |      |      |             |
|----------|------|------|-------------|
| BH2699   | 60   | 756  | 19.89325589 |
| BH2700   | 88   | 1032 | 21.37368424 |
| BH2701   | 108  | 696  | 38.89474514 |
| BH2702   | 3469 | 915  | 950.2975728 |
| BH2703   | 80   | 990  | 20.25495145 |
| BH2704   | 3    | 303  | 2.481732913 |
| BH2705   | 27   | 525  | 12.89082982 |
| opuE     | 35   | 1524 | 5.756513024 |
| BH2707   | 13   | 171  | 19.05564512 |
| BH2708   | 166  | 1581 | 26.31798484 |
| BH2709   | 38   | 303  | 31.43528357 |
| BH2710   | 90   | 435  | 51.85966019 |
| BH2711   | 0    | 42   | 0           |
| BH2712   | 17   | 891  | 4.782419093 |
| BH2713   | 17   | 1344 | 3.170487658 |
| BH2714   | 10   | 1413 | 1.773920908 |
| BH2715   | 8    | 939  | 2.135506064 |
| BH2716   | 6    | 1314 | 1.14454349  |
| BH2717   | 0    | 975  | 0           |
| BH2718   | 1    | 1293 | 0.193855394 |
| BH2719   | 2    | 783  | 0.640242718 |
| BH2720   | 6    | 888  | 1.693615029 |
| BH2721   | 1    | 348  | 0.720273058 |
| BH2722   | 6    | 573  | 2.62465994  |
| BH2723   | 50   | 3045 | 4.115846047 |
| BH2724   | 2    | 819  | 0.612100181 |
| BH2725   | 2    | 873  | 0.574238314 |
| BH2726   | 3    | 1278 | 0.588392076 |
| BH2727   | 13   | 1794 | 1.816340755 |
| BH2728   | 6    | 1533 | 0.981037277 |
| BH2729   | 31   | 1005 | 7.731647514 |
| BH2730   | 43   | 1413 | 7.627859903 |
| BH2731   | 9    | 1116 | 2.021411486 |
| BH2732   | 1    | 426  | 0.588392076 |
| BH2733   | 0    | 291  | 0           |
| BH2734   | 27   | 1725 | 3.923296032 |
| BH2735   | 8    | 189  | 10.60973648 |
| trnM-Val | 818  | 73   | 2808.709724 |
| BH2736   | 125  | 69   | 454.0851888 |
| BH2737   | 4085 | 1548 | 661.4507584 |
| BH2738   | 74   | 393  | 47.19712925 |

|          |      |      |             |
|----------|------|------|-------------|
| BH2739   | 220  | 1581 | 34.87925701 |
| BH2740   | 47   | 921  | 12.79129874 |
| BH2741   | 50   | 1230 | 10.18922863 |
| BH2742   | 54   | 297  | 45.57364077 |
| BH2743   | 148  | 510  | 72.73910507 |
| BH2744   | 102  | 327  | 78.18597086 |
| BH2745   | 199  | 543  | 91.86068108 |
| BH2746   | 151  | 573  | 66.05394182 |
| BH2747   | 188  | 909  | 51.84064308 |
| BH2748   | 19   | 597  | 7.977295579 |
| BH2749   | 49   | 1218 | 10.08382281 |
| BH2750   | 133  | 1047 | 31.84060957 |
| BH2751   | 88   | 693  | 31.82920943 |
| BH2752   | 242  | 1599 | 37.93528197 |
| trnN-Arg | 558  | 75   | 1864.87338  |
| BH2753   | 241  | 363  | 166.4128398 |
| BH2754   | 627  | 1605 | 97.91943938 |
| BH2755   | 94   | 1047 | 22.50388947 |
| xylB     | 151  | 1497 | 25.28317212 |
| xylA     | 140  | 1323 | 26.52434119 |
| xylR     | 55   | 1161 | 11.87426902 |
| BH2759   | 418  | 438  | 239.2095893 |
| BH2760   | 281  | 1143 | 61.62210132 |
| bfmBB    | 977  | 1281 | 191.1709279 |
| bfmBAB   | 488  | 984  | 124.3085893 |
| bfmBAA   | 542  | 993  | 136.8127121 |
| BH2764   | 728  | 1425 | 128.0539352 |
| BH2765   | 482  | 1095 | 110.3339924 |
| BH2766   | 828  | 2046 | 101.4381037 |
| BH2767   | 9    | 258  | 8.743779915 |
| BH2768   | 18   | 798  | 5.653872727 |
| BH2769   | 17   | 669  | 6.369410183 |
| BH2770   | 7    | 459  | 3.822625642 |
| BH2771   | 11   | 1140 | 2.418601111 |
| BH2772   | 10   | 198  | 12.65934466 |
| spo0A    | 211  | 804  | 65.78135586 |
| BH2774   | 0    | 1380 | 0           |
| spoIVB   | 80   | 1314 | 15.26057986 |
| recN     | 1371 | 1698 | 202.3840037 |
| ahrC     | 449  | 450  | 250.0980131 |
| BH2778   | 767  | 819  | 234.7404195 |



|                           |       |      |             |
|---------------------------|-------|------|-------------|
| BH2779                    | 3181  | 1890 | 421.8696466 |
| BH2780                    | 339   | 603  | 140.9155111 |
| OLE RNA (2908358-2908965) | 28211 | 608  | 11630.31067 |
| BH2781                    | 623   | 885  | 176.449808  |
| BH2782                    | 240   | 243  | 247.5605178 |
| BH2783                    | 1234  | 1377 | 224.6247639 |
| folD                      | 694   | 840  | 207.0887938 |
| nusB                      | 190   | 405  | 117.5912459 |
| BH2786                    | 799   | 399  | 501.9382566 |
| accC                      | 3751  | 1359 | 691.8373774 |
| accB                      | 1163  | 510  | 571.5917514 |
| BH2789                    | 271   | 354  | 191.8856259 |
| spoIIAH                   | 13    | 636  | 5.123451753 |
| spoIIAG                   | 13    | 666  | 4.892665638 |
| spoIIAF                   | 10    | 651  | 3.850307592 |
| spoIIAE                   | 6     | 1194 | 1.259572986 |
| spoIIAD                   | 5     | 324  | 3.86813309  |
| spoIIAC                   | 1     | 207  | 1.210893837 |
| spoIIAB                   | 4     | 513  | 1.95442514  |
| spoIIAA                   | 5     | 930  | 1.347607657 |
| BH2798                    | 0     | 282  | 0           |
| efp                       | 1032  | 558  | 463.5770341 |
| BH2800                    | 1557  | 1068 | 365.4212292 |
| BH2801                    | 832   | 438  | 476.1300917 |
| BH2802                    | 1     | 480  | 0.522197967 |
| BH2803                    | 186   | 978  | 47.67058743 |
| BH2804                    | 124   | 411  | 75.62341364 |
| BH2805                    | 44    | 891  | 12.37802589 |
| BH2806                    | 27    | 966  | 7.005885771 |
| BH2807                    | 465   | 420  | 277.5109197 |
| spIB                      | 156   | 1032 | 37.88971297 |
| BH2809                    | 5     | 594  | 2.109890776 |
| BH2810                    | 2169  | 2559 | 212.4543758 |
| BH2811                    | 483   | 852  | 142.0966863 |
| BH2812                    | 222   | 831  | 66.96199204 |
| BH2813                    | 187   | 378  | 124.0012951 |
| BH2814                    | 286   | 1467 | 48.86662368 |
| BH2815                    | 211   | 1344 | 39.35134681 |
| BH2816                    | 100   | 1098 | 22.82832643 |
| BH2817                    | 7     | 1701 | 1.031502157 |
| BH2818                    | 17    | 801  | 5.319769553 |

|           |      |      |             |
|-----------|------|------|-------------|
| BH2819    | 550  | 189  | 729.4193827 |
| BH2820    | 52   | 636  | 20.49380701 |
| BH2821    | 544  | 246  | 554.2940373 |
| BH2822    | 6    | 207  | 7.265363022 |
| BH2823    | 14   | 384  | 9.138464425 |
| comGD     | 16   | 459  | 8.737430039 |
| BH2825    | 14   | 327  | 10.73140777 |
| BH2826    | 40   | 417  | 24.04364741 |
| comGC     | 21   | 309  | 17.03480747 |
| BH2829    | 7    | 228  | 7.69554899  |
| BH2828    | 30   | 228  | 32.98092424 |
| trnO-Gly1 | 106  | 71   | 374.2173601 |
| trnO-Arg  | 156  | 77   | 507.8205686 |
| trnO-Gly2 | 229  | 75   | 765.3333407 |
| trnO-Gln  | 194  | 75   | 648.360996  |
| trnO-His  | 197  | 76   | 649.7242076 |
| trnO-Tyr  | 362  | 85   | 1067.495515 |
| trnO-Met  | 283  | 77   | 921.2385956 |
| trnO-Ser  | 488  | 93   | 1315.265073 |
| trnO-Ala  | 410  | 76   | 1352.217894 |
| bsaA      | 16   | 474  | 8.460929088 |
| comGB     | 9    | 972  | 2.320879854 |
| comGA     | 44   | 1047 | 10.5337355  |
| trnP-Gln  | 8    | 72   | 27.85055825 |
| BH2833    | 2    | 186  | 2.695215314 |
| BH2834    | 209  | 2343 | 22.35889888 |
| BH2835    | 127  | 648  | 49.12529024 |
| BH2836    | 7    | 720  | 2.436923847 |
| BH2837    | 8    | 690  | 2.906145209 |
| BH2838    | 12   | 744  | 4.042822972 |
| cgeB      | 2    | 804  | 0.623519961 |
| BH2840    | 0    | 351  | 0           |
| BH2841    | 1    | 1722 | 0.145560409 |
| BH2842    | 0    | 471  | 0           |
| BH2843    | 1816 | 783  | 581.3403883 |
| BH2844    | 837  | 2061 | 101.7943985 |
| BH2845    | 40   | 741  | 13.53063559 |
| BH2846    | 179  | 441  | 101.7397944 |
| BH2847    | 578  | 909  | 159.3824027 |
| BH2848    | 482  | 798  | 151.3981475 |
| BH2849    | 257  | 636  | 101.2867    |

|        |      |      |             |
|--------|------|------|-------------|
| BH2850 | 301  | 381  | 198.024048  |
| BH2851 | 38   | 579  | 16.45058881 |
| BH2852 | 696  | 699  | 249.5792516 |
| BH2853 | 122  | 1845 | 16.57447857 |
| BH2854 | 133  | 393  | 84.82727284 |
| BH2855 | 165  | 921  | 44.90562324 |
| BH2856 | 1412 | 1797 | 196.9531966 |
| BH2857 | 14   | 1218 | 2.881092233 |
| BH2858 | 253  | 1512 | 41.94161451 |
| mecA   | 313  | 639  | 122.7778131 |
| BH2860 | 126  | 672  | 46.99781705 |
| BH2861 | 357  | 396  | 225.9693022 |
| BH2862 | 8    | 126  | 15.91460471 |
| BH2863 | 6    | 168  | 8.951965152 |
| BH2864 | 67   | 228  | 73.65739747 |
| BH2865 | 564  | 648  | 218.1627063 |
| BH2866 | 140  | 540  | 64.98463591 |
| BH2867 | 2    | 993  | 0.504843956 |
| BH2868 | 15   | 555  | 6.774460115 |
| BH2869 | 51   | 180  | 71.01892354 |
| trpS   | 292  | 993  | 73.7072176  |
| BH2871 | 374  | 123  | 762.1543014 |
| BH2872 | 20   | 747  | 6.710977891 |
| BH2873 | 6    | 882  | 1.705136219 |
| BH2874 | 5    | 225  | 5.57011165  |
| BH2875 | 66   | 951  | 17.39561682 |
| BH2876 | 37   | 198  | 46.83957524 |
| dacB   | 128  | 1188 | 27.00660194 |
| BH2878 | 12   | 774  | 3.886124407 |
| BH2879 | 45   | 588  | 19.18278247 |
| BH2880 | 37   | 651  | 14.24613809 |
| BH2881 | 105  | 1284 | 20.4974903  |
| BH2882 | 4602 | 1236 | 933.2640951 |
| BH2883 | 1855 | 939  | 495.1704686 |
| BH2884 | 27   | 300  | 22.55895218 |
| BH2885 | 89   | 255  | 87.48351826 |
| BH2886 | 148  | 330  | 112.4149806 |
| BH2887 | 478  | 786  | 152.4339715 |
| BH2888 | 432  | 237  | 456.8901708 |
| med    | 437  | 873  | 125.4710717 |
| BH2890 | 9    | 174  | 12.96491505 |

|        |     |      |             |
|--------|-----|------|-------------|
| BH2891 | 14  | 906  | 3.873256445 |
| BH2892 | 5   | 747  | 1.677744473 |
| BH2893 | 32  | 180  | 44.5608932  |
| argf   | 62  | 960  | 16.18813698 |
| carB   | 127 | 3144 | 10.12505982 |
| carA   | 49  | 1080 | 11.37231129 |
| argD   | 69  | 1155 | 14.97419625 |
| argB   | 76  | 783  | 24.3292233  |
| argJ   | 86  | 1236 | 17.44039813 |
| argC   | 79  | 1038 | 19.07682747 |
| BH2901 | 0   | 315  | 0           |
| BH2902 | 19  | 330  | 14.43165291 |
| BH2903 | 155 | 1686 | 23.04361136 |
| BH2904 | 218 | 606  | 90.16962918 |
| BH2905 | 180 | 915  | 49.3091851  |
| BH2906 | 215 | 810  | 66.53188915 |
| BH2907 | 335 | 456  | 184.1434937 |
| BH2908 | 35  | 609  | 14.40546116 |
| BH2909 | 112 | 570  | 49.25151354 |
| BH2910 | 180 | 714  | 63.19034225 |
| BH2911 | 29  | 309  | 23.52425794 |
| BH2912 | 339 | 1548 | 54.89150725 |
| BH2913 | 773 | 2988 | 64.84482388 |
| BH2914 | 85  | 183  | 116.4244648 |
| BH2915 | 575 | 507  | 284.2734496 |
| BH2916 | 770 | 882  | 218.8258148 |
| BH2917 | 574 | 780  | 184.4563896 |
| BH2918 | 45  | 255  | 44.23323957 |
| BH2919 | 6   | 129  | 11.65837322 |
| BH2920 | 309 | 372  | 208.205383  |
| BH2921 | 548 | 1086 | 126.4815408 |
| BH2922 | 0   | 1215 | 0           |
| BH2923 | 407 | 1035 | 98.56675833 |
| BH2924 | 33  | 843  | 9.812118387 |
| BH2925 | 5   | 1293 | 0.969276969 |
| BH2926 | 113 | 1290 | 21.9566029  |
| BH2927 | 68  | 1737 | 9.812631922 |
| BH2928 | 44  | 600  | 18.38136844 |
| BH2929 | 26  | 633  | 10.29546703 |
| BH2930 | 81  | 756  | 26.85589545 |
| BH2931 | 16  | 270  | 14.85363107 |

|        |       |      |             |
|--------|-------|------|-------------|
| BH2932 | 17    | 633  | 6.73165152  |
| BH2933 | 100   | 810  | 30.94506472 |
| BH2934 | 44    | 729  | 15.12869831 |
| BH2935 | 11    | 1185 | 2.326755499 |
| BH2936 | 219   | 1359 | 40.3925315  |
| BH2937 | 11921 | 1041 | 2870.373241 |
| BH2938 | 1349  | 1965 | 172.078182  |
| BH2939 | 31    | 738  | 10.52886958 |
| BH2940 | 309   | 855  | 90.58760525 |
| BH2941 | 63    | 1386 | 11.39341019 |
| BH2942 | 0     | 156  | 0           |
| BH2943 | 40    | 1182 | 8.482403528 |
| BH2944 | 94    | 765  | 30.79944089 |
| BH2945 | 18    | 1971 | 2.289086979 |
| BH2946 | 5     | 489  | 2.562934808 |
| BH2947 | 16    | 1008 | 3.978651178 |
| atoC   | 33    | 1362 | 6.073139354 |
| BH2949 | 51    | 2004 | 6.378945228 |
| BH2950 | 0     | 69   | 0           |
| BH2951 | 155   | 573  | 67.80371511 |
| BH2952 | 197   | 1779 | 27.75662719 |
| BH2953 | 153   | 756  | 50.72780253 |
| BH2954 | 75    | 1023 | 18.37646805 |
| mutA   | 116   | 2151 | 13.51742576 |
| mutB   | 14    | 2046 | 1.715137018 |
| mmdA   | 18    | 1551 | 2.908955794 |
| BH2958 | 19    | 648  | 7.349452871 |
| BH2959 | 15    | 186  | 20.21411486 |
| BH2960 | 57    | 294  | 48.59638225 |
| BH2961 | 50    | 777  | 16.12966694 |
| BH2962 | 24    | 222  | 27.09784046 |
| BH2963 | 18    | 360  | 12.53275121 |
| BH2964 | 23    | 834  | 6.91254863  |
| BH2965 | 0     | 1173 | 0           |
| BH2966 | 1     | 126  | 1.989325589 |
| BH2967 | 0     | 1326 | 0           |
| BH2968 | 1151  | 363  | 794.7766747 |
| cheW   | 963   | 468  | 515.7709153 |
| cheA   | 4342  | 2049 | 531.1586702 |
| BH2971 | 323   | 1632 | 49.60880688 |
| BH2972 | 144   | 831  | 43.43480564 |

|        |       |      |             |
|--------|-------|------|-------------|
| phnD   | 2759  | 942  | 734.1371676 |
| phnC   | 444   | 777  | 143.2314424 |
| BH2975 | 394   | 792  | 124.6945449 |
| phnE   | 261   | 801  | 81.67410902 |
| BH2977 | 0     | 60   | 0           |
| BH2978 | 0     | 1215 | 0           |
| BH2979 | 14    | 300  | 11.69723446 |
| BH2980 | 812   | 3390 | 60.03890256 |
| BH2981 | 563   | 2868 | 49.20459507 |
| BH2982 | 93    | 468  | 49.80965225 |
| BH2983 | 391   | 375  | 261.3496386 |
| rocF   | 69    | 903  | 19.15304172 |
| BH2985 | 6     | 75   | 20.05240194 |
| BH2986 | 8     | 384  | 5.221979672 |
| BH2987 | 44    | 405  | 27.23165695 |
| BH2988 | 4     | 483  | 2.075818006 |
| BH2989 | 1     | 447  | 0.560749495 |
| BH2990 | 93    | 651  | 35.80786061 |
| BH2991 | 17    | 837  | 5.090962261 |
| BH2992 | 9     | 885  | 2.549034145 |
| BH2993 | 9     | 957  | 2.357257281 |
| BH2994 | 17    | 1008 | 4.227316877 |
| BH2995 | 27    | 1272 | 5.32050759  |
| BH2996 | 9     | 309  | 7.300631774 |
| BH2997 | 17    | 294  | 14.49365786 |
| arsC   | 36    | 420  | 21.48471636 |
| arsB   | 84    | 1311 | 16.06027615 |
| arsR   | 37    | 351  | 26.42232449 |
| BH3001 | 120   | 561  | 53.61604797 |
| BH3002 | 300   | 735  | 102.3081732 |
| BH3003 | 72    | 177  | 101.9613658 |
| BH3004 | 21    | 318  | 16.55269028 |
| BH3005 | 3     | 1167 | 0.644357389 |
| BH3006 | 9     | 1080 | 2.088791869 |
| BH3007 | 12    | 1011 | 2.975133819 |
| BH3008 | 234   | 1149 | 51.04723731 |
| rpmA   | 10966 | 285  | 9644.50174  |
| BH3010 | 11187 | 342  | 8199.057767 |
| rplU   | 8252  | 309  | 6693.868155 |
| BH3012 | 244   | 171  | 357.6598007 |
| BH3013 | 699   | 339  | 516.8373509 |

|         |      |      |             |
|---------|------|------|-------------|
| cafA    | 754  | 1503 | 125.7444366 |
| spoIVFB | 36   | 870  | 10.37193204 |
| spoIVFA | 69   | 783  | 22.08837378 |
| mobA    | 62   | 597  | 26.03117505 |
| moaD    | 67   | 237  | 70.86028111 |
| moaE    | 241  | 471  | 128.2544816 |
| mobB    | 151  | 510  | 74.21354639 |
| moeA    | 358  | 1272 | 70.54598953 |
| moaB    | 131  | 513  | 64.00742334 |
| moaC    | 49   | 498  | 24.66284375 |
| BH3024  | 93   | 381  | 61.18350985 |
| BH3025  | 51   | 516  | 24.77404309 |
| BH3026  | 87   | 1578 | 13.81938347 |
| minD    | 1313 | 795  | 413.9749017 |
| minC    | 1174 | 699  | 420.9856916 |
| mreD    | 550  | 525  | 262.5909778 |
| mreC    | 1410 | 882  | 400.7070115 |
| mreB    | 1973 | 1041 | 475.0647097 |
| BH3032  | 395  | 699  | 141.6433971 |
| maf     | 333  | 573  | 145.6686267 |
| spoIIB  | 799  | 1059 | 189.1155471 |
| comC    | 274  | 489  | 140.4488275 |
| BH3036  | 1096 | 1704 | 161.2194287 |
| folC    | 1056 | 1293 | 204.7112959 |
| valS    | 5300 | 2643 | 502.6377709 |
| BH3039  | 0    | 186  | 0           |
| BH3040  | 5    | 1026 | 1.221515713 |
| BH3041  | 10   | 870  | 2.881092233 |
| spoVID  | 9    | 1251 | 1.803273556 |
| hemL    | 876  | 1290 | 170.212249  |
| hemB    | 492  | 987  | 124.9465774 |
| hemD    | 385  | 762  | 126.6432865 |
| hemC    | 1155 | 936  | 309.3018729 |
| hemX    | 328  | 816  | 100.7534901 |
| hemA    | 790  | 1380 | 143.4909197 |
| BH3049  | 735  | 585  | 314.9255433 |
| lonA    | 1942 | 2325 | 209.3643256 |
| lonB    | 53   | 1671 | 7.950159357 |
| clpX    | 2589 | 1275 | 508.9771433 |
| tig     | 6370 | 1296 | 1232.000389 |
| BH3054  | 440  | 1062 | 103.8495392 |

|          |      |      |             |
|----------|------|------|-------------|
| leuD     | 511  | 585  | 218.9482349 |
| leuC     | 1721 | 1419 | 304.0009138 |
| leuB     | 799  | 1092 | 183.4005168 |
| leuA     | 1301 | 1548 | 210.6603272 |
| ilvC     | 1449 | 1023 | 355.0333628 |
| ilvN     | 522  | 522  | 250.6550242 |
| BH3061   | 721  | 807  | 223.9433364 |
| ilvD     | 2590 | 1668 | 389.2065424 |
| BH3063   | 0    | 351  | 0           |
| BH3064   | 8856 | 648  | 3425.618665 |
| BH3065   | 9    | 213  | 10.59105736 |
| trnQ-Arg | 1792 | 77   | 5833.426019 |
| trnQ-Gly | 3402 | 74   | 11523.35666 |
| BH3066   | 530  | 510  | 260.484633  |
| BH3067   | 665  | 585  | 284.9326344 |
| rph      | 704  | 774  | 227.9859652 |
| BH3069   | 18   | 129  | 34.97511966 |
| gerM     | 29   | 1098 | 6.620214666 |
| BH3071   | 607  | 603  | 252.3177441 |
| BH3072   | 234  | 456  | 128.6256045 |
| ptsI     | 7658 | 1719 | 1116.64699  |
| ptsH     | 1904 | 264  | 1807.754417 |
| gerE     | 14   | 225  | 15.59631262 |
| paiA     | 9    | 477  | 4.72934008  |
| BH3077   | 9    | 453  | 4.979901144 |
| BH3078   | 3    | 639  | 1.176784151 |
| BH3079   | 4    | 150  | 6.68413398  |
| BH3080   | 8    | 108  | 18.56703883 |
| BH3081   | 10   | 351  | 7.141168782 |
| BH3082   | 35   | 636  | 13.79390857 |
| BH3083   | 4    | 48   | 20.88791869 |
| BH3084   | 242  | 564  | 107.55056   |
| BH3085   | 164  | 387  | 106.2207338 |
| BH3086   | 17   | 369  | 11.54779244 |
| BH3087   | 3    | 258  | 2.914593305 |
| BH3088   | 17   | 714  | 5.967976768 |
| BH3089   | 101  | 624  | 40.57076514 |
| BH3090   | 56   | 462  | 30.38242718 |
| sdhB     | 1560 | 756  | 517.2246532 |
| sdhA     | 2794 | 1770 | 395.6667445 |
| sdhC     | 1006 | 630  | 400.2523086 |



|        |      |      |             |
|--------|------|------|-------------|
| BH3094 | 290  | 1350 | 53.84441261 |
| BH3095 | 170  | 417  | 102.1855015 |
| lysC   | 391  | 1239 | 79.10098021 |
| uvrC   | 744  | 1776 | 105.0041318 |
| trxA   | 1596 | 315  | 1269.985456 |
| etfA   | 46   | 978  | 11.78950012 |
| etfB   | 46   | 771  | 14.95477447 |
| BH3101 | 27   | 777  | 8.710020147 |
| BH3102 | 47   | 588  | 20.03535058 |
| BH3103 | 22   | 1695 | 3.253339548 |
| BH3104 | 34   | 1701 | 5.010153336 |
| BH3105 | 189  | 408  | 116.1122539 |
| BH3106 | 1502 | 2358 | 159.6623606 |
| BH3107 | 426  | 1716 | 62.22554798 |
| BH3108 | 178  | 540  | 82.62332281 |
| BH3109 | 275  | 276  | 249.7468539 |
| pheT   | 1569 | 2427 | 162.0427413 |
| pheS   | 299  | 1035 | 72.41145145 |
| BH3112 | 163  | 756  | 54.04334517 |
| BH3113 | 7    | 207  | 8.476256858 |
| BH3114 | 3    | 864  | 0.870329945 |
| dinB   | 26   | 510  | 12.77849143 |
| BH3116 | 10   | 918  | 2.730446887 |
| BH3117 | 100  | 693  | 36.16955617 |
| BH3118 | 33   | 585  | 14.13951419 |
| BH3119 | 56   | 405  | 34.65847249 |
| BH3120 | 89   | 492  | 45.34206739 |
| BH3121 | 1723 | 1197 | 360.8008411 |
| BH3122 | 1388 | 684  | 508.6391428 |
| BH3123 | 1491 | 1125 | 332.2014588 |
| BH3124 | 433  | 675  | 160.7905563 |
| BH3125 | 4    | 429  | 2.337109783 |
| BH3126 | 2    | 204  | 2.457402198 |
| BH3127 | 2    | 1068 | 0.469391431 |
| cysT   | 1    | 840  | 0.298398838 |
| cysW   | 4    | 864  | 1.160439927 |
| cysA   | 3    | 1074 | 0.700153699 |
| BH3131 | 140  | 453  | 77.4651289  |
| BH3132 | 656  | 1086 | 151.4085598 |
| BH3133 | 188  | 489  | 96.36634879 |
| BH3134 | 99   | 411  | 60.37675766 |

|        |       |      |             |
|--------|-------|------|-------------|
| BH3135 | 272   | 567  | 120.2436801 |
| BH3136 | 145   | 285  | 127.5262404 |
| BH3137 | 0     | 1218 | 0           |
| rplT   | 6618  | 360  | 4607.874862 |
| rpmI   | 3311  | 201  | 4128.94918  |
| infC   | 12524 | 573  | 5478.540181 |
| thrS   | 1125  | 1938 | 145.5040775 |
| BH3142 | 28    | 867  | 8.094971948 |
| BH3143 | 1490  | 1113 | 335.557939  |
| dnaI   | 591   | 936  | 158.2661531 |
| dnaB   | 643   | 1458 | 110.5426479 |
| BH3146 | 719   | 462  | 390.0886633 |
| BH3147 | 412   | 402  | 256.8902239 |
| BH3148 | 328   | 384  | 214.1011665 |
| gapB   | 34    | 1035 | 8.234078091 |
| BH3150 | 521   | 606  | 215.4971413 |
| BH3151 | 205   | 642  | 80.03781927 |
| mutM   | 587   | 825  | 178.3448476 |
| polA   | 1179  | 2631 | 112.3231751 |
| hflC   | 865   | 933  | 232.3864909 |
| hflK   | 587   | 960  | 153.2651034 |
| phoR   | 1174  | 1770 | 166.2536714 |
| phoP   | 422   | 720  | 146.9116948 |
| citH   | 2900  | 945  | 769.2058945 |
| citC   | 4252  | 1269 | 839.8622246 |
| citZ   | 2073  | 1119 | 464.3501924 |
| BH3161 | 662   | 474  | 350.070941  |
| BH3162 | 296   | 396  | 187.3583009 |
| pykA   | 6769  | 1755 | 966.7714297 |
| pfk    | 2343  | 960  | 611.7549185 |
| accA   | 1400  | 978  | 358.8108731 |
| accD   | 1111  | 849  | 328.0067514 |
| BH3167 | 644   | 654  | 246.8223786 |
| BH3168 | 1495  | 1233 | 303.9166758 |
| dnaE   | 546   | 3351 | 40.84083654 |
| BH3170 | 2     | 336  | 1.491994192 |
| BH3171 | 5     | 507  | 2.47194304  |
| BH3172 | 123   | 225  | 137.0247466 |
| BH3173 | 273   | 945  | 72.41145145 |
| BH3174 | 42    | 288  | 36.5538577  |
| BH3175 | 628   | 1308 | 120.3450728 |

|        |      |      |             |
|--------|------|------|-------------|
| BH3176 | 39   | 249  | 39.25922066 |
| BH3177 | 11   | 210  | 13.12954889 |
| BH3178 | 504  | 681  | 185.5068021 |
| pepQ   | 217  | 1095 | 49.67318745 |
| BH3180 | 55   | 1116 | 12.35307019 |
| BH3181 | 9    | 381  | 5.920984825 |
| BH3182 | 103  | 759  | 34.01510869 |
| BH3183 | 1    | 159  | 1.576446693 |
| BH3184 | 167  | 444  | 94.27790326 |
| BH3185 | 6    | 111  | 13.54892023 |
| argH   | 329  | 1377 | 59.88780173 |
| argG   | 205  | 1230 | 41.77583737 |
| BH3188 | 34   | 315  | 27.05482801 |
| BH3189 | 16   | 222  | 18.06522697 |
| BH3190 | 235  | 840  | 70.12372702 |
| BH3191 | 344  | 948  | 90.9549877  |
| ackA   | 2484 | 1176 | 529.4447961 |
| BH3193 | 405  | 993  | 102.2309011 |
| BH3194 | 1715 | 501  | 858.0306718 |
| BH3195 | 21   | 444  | 11.8553052  |
| BH3196 | 40   | 678  | 14.78790703 |
| BH3197 | 198  | 537  | 92.42028827 |
| BH3198 | 908  | 996  | 228.5087972 |
| BH3199 | 747  | 798  | 234.6357182 |
| BH3200 | 136  | 1590 | 21.43967503 |
| BH3201 | 13   | 1584 | 2.057143507 |
| BH3202 | 212  | 207  | 256.7094934 |
| BH3203 | 621  | 1149 | 135.4715144 |
| nifZ   | 332  | 1143 | 72.80618377 |
| BH3205 | 1550 | 1686 | 230.4361136 |
| BH3206 | 87   | 822  | 26.5291814  |
| BH3207 | 32   | 654  | 12.26446602 |
| BH3208 | 151  | 483  | 78.36212973 |
| rpsD   | 5355 | 603  | 2225.96626  |
| BH3210 | 34   | 405  | 21.04264401 |
| BH3211 | 24   | 1167 | 5.15485911  |
| BH3212 | 30   | 897  | 8.383111179 |
| BH3213 | 2    | 1038 | 0.482957657 |
| BH3214 | 0    | 957  | 0           |
| BH3215 | 7    | 1158 | 1.515185811 |
| BH3216 | 6    | 582  | 2.584072415 |

|        |      |      |             |
|--------|------|------|-------------|
| BH3217 | 21   | 723  | 7.280436389 |
| BH3218 | 28   | 480  | 14.62154308 |
| BH3219 | 13   | 387  | 8.419936215 |
| BH3220 | 21   | 369  | 14.26492008 |
| BH3221 | 22   | 396  | 13.92527912 |
| BH3222 | 12   | 375  | 8.020960776 |
| BH3223 | 3    | 729  | 1.031502157 |
| BH3224 | 16   | 1365 | 2.93808087  |
| BH3225 | 4    | 699  | 1.434363515 |
| BH3226 | 14   | 93   | 37.7330144  |
| BH3227 | 108  | 450  | 60.15720582 |
| tyrZ   | 614  | 1239 | 124.2148385 |
| pdpF   | 2694 | 2901 | 232.7696089 |
| BH3230 | 10   | 1077 | 2.3273447   |
| BH3231 | 7    | 909  | 1.93023671  |
| bglS   | 0    | 2556 | 0           |
| BH3233 | 0    | 471  | 0           |
| acsA   | 73   | 1716 | 10.66306339 |
| acuA   | 51   | 633  | 20.19495456 |
| acuB   | 68   | 648  | 26.30330501 |
| acuC   | 97   | 1170 | 20.78080116 |
| pfs    | 111  | 702  | 39.63348674 |
| BH3239 | 2426 | 753  | 807.5552308 |
| BH3240 | 3431 | 810  | 1061.725171 |
| ccpA   | 4797 | 1002 | 1199.992167 |
| aroA   | 3391 | 1095 | 776.2293947 |
| BH3243 | 733  | 2163 | 84.94227128 |
| BH3244 | 761  | 423  | 450.9420176 |
| BH3245 | 675  | 447  | 378.5059091 |
| BH3246 | 453  | 1116 | 101.7443781 |
| BH3247 | 0    | 1215 | 0           |
| murC   | 1389 | 1302 | 267.4038623 |
| BH3249 | 1399 | 1098 | 319.3682868 |
| BH3250 | 1558 | 2883 | 135.4563052 |
| BH3251 | 1319 | 603  | 548.2818855 |
| BH3252 | 175  | 798  | 54.96820707 |
| BH3253 | 87   | 321  | 67.93453928 |
| BH3254 | 311  | 1011 | 77.10555147 |
| BH3255 | 19   | 444  | 10.72622851 |
| BH3256 | 304  | 534  | 142.6949951 |
| BH3257 | 389  | 1074 | 90.7865963  |

|        |      |      |             |
|--------|------|------|-------------|
| BH3258 | 50   | 309  | 40.55906541 |
| BH3259 | 401  | 720  | 139.6009232 |
| BH3260 | 158  | 855  | 46.31987582 |
| BH3261 | 284  | 663  | 107.369573  |
| BH3262 | 27   | 249  | 27.17946046 |
| BH3263 | 802  | 786  | 255.7574166 |
| amyX   | 420  | 2154 | 48.87423871 |
| BH3265 | 275  | 870  | 79.2300364  |
| BH3266 | 452  | 336  | 337.1906874 |
| BH3267 | 372  | 966  | 96.52553729 |
| BH3268 | 249  | 684  | 91.24722374 |
| BH3269 | 60   | 384  | 39.16484754 |
| BH3270 | 57   | 561  | 25.46762278 |
| BH3271 | 223  | 939  | 59.52723153 |
| BH3272 | 137  | 1398 | 24.56347519 |
| BH3273 | 347  | 717  | 121.3072433 |
| BH3274 | 325  | 675  | 120.6857524 |
| BH3275 | 535  | 1197 | 112.0304411 |
| BH3276 | 567  | 1146 | 124.0151822 |
| BH3277 | 278  | 1620 | 43.01363996 |
| BH3278 | 10   | 492  | 5.094614314 |
| BH3279 | 124  | 1269 | 24.49268952 |
| BH3280 | 142  | 426  | 83.55167475 |
| leuS   | 3331 | 2421 | 344.8706674 |
| BH3282 | 132  | 1206 | 27.43487828 |
| BH3283 | 432  | 978  | 110.7187837 |
| BH3284 | 407  | 978  | 104.3114467 |
| BH3285 | 202  | 573  | 88.3635513  |
| BH3286 | 105  | 591  | 44.53261852 |
| BH3287 | 353  | 1083 | 81.70011409 |
| BH3288 | 530  | 783  | 169.6643204 |
| BH3289 | 72   | 525  | 34.37554618 |
| BH3290 | 13   | 960  | 3.394286787 |
| BH3291 | 22   | 999  | 5.519930464 |
| BH3292 | 6    | 786  | 1.913397132 |
| BH3293 | 1    | 351  | 0.714116878 |
| BH3294 | 19   | 765  | 6.225418903 |
| BH3295 | 22   | 771  | 7.152283441 |
| BH3296 | 6    | 987  | 1.523738749 |
| BH3297 | 3    | 909  | 0.827244304 |
| BH3298 | 33   | 3216 | 2.572019838 |

|          |      |      |             |
|----------|------|------|-------------|
| BH3299   | 8    | 666  | 3.010871162 |
| metK     | 2536 | 1200 | 529.7176179 |
| BH3301   | 1    | 357  | 0.702114914 |
| pckA     | 28   | 1584 | 4.430770631 |
| BH3303   | 10   | 324  | 7.73626618  |
| BH3304   | 22   | 390  | 14.13951419 |
| BH3305   | 85   | 861  | 24.74526952 |
| BH3306   | 179  | 798  | 56.22462323 |
| BH3307   | 6    | 54   | 27.85055825 |
| BH3308   | 20   | 474  | 10.57616136 |
| BH3309   | 10   | 1212 | 2.068110761 |
| BH3310   | 235  | 489  | 120.457936  |
| BH3311   | 66   | 144  | 114.8835528 |
| BH3312   | 40   | 147  | 68.20544877 |
| patB     | 502  | 1194 | 105.3842732 |
| BH3314   | 286  | 975  | 73.52547378 |
| BH3315   | 10   | 327  | 7.665291261 |
| gabD     | 455  | 1428 | 79.86557145 |
| BH3317   | 18   | 297  | 15.19121359 |
| BH3318   | 29   | 315  | 23.07617683 |
| BH3319   | 373  | 348  | 268.6618507 |
| BH3320   | 702  | 684  | 257.2512091 |
| ssuE     | 127  | 537  | 59.27967985 |
| BH3322   | 215  | 936  | 57.5756733  |
| BH3323   | 8    | 714  | 2.808459655 |
| BH3324   | 10   | 1392 | 1.800682645 |
| BH3325   | 18   | 729  | 6.189012944 |
| BH3326   | 127  | 960  | 33.15957092 |
| BH3327   | 23   | 282  | 20.44349488 |
| BH3328   | 56   | 531  | 26.43442817 |
| BH3329   | 81   | 783  | 25.92983009 |
| BH3330   | 8    | 636  | 3.152893387 |
| BH3331   | 1    | 525  | 0.477438141 |
| BH3332   | 32   | 588  | 13.64108975 |
| BH3333   | 36   | 1173 | 7.692737317 |
| BH3334   | 0    | 78   | 0           |
| BH3335   | 522  | 603  | 216.9849464 |
| BH3336   | 261  | 468  | 139.7883789 |
| BH3337   | 42   | 309  | 34.06961495 |
| BH3338   | 57   | 801  | 17.83687438 |
| trnR-Ala | 161  | 76   | 530.9928803 |

|        |      |      |             |
|--------|------|------|-------------|
| BH3339 | 67   | 162  | 103.6659668 |
| BH3340 | 13   | 1017 | 3.204046524 |
| BH3341 | 13   | 429  | 7.595606795 |
| BH3342 | 14   | 309  | 11.35653832 |
| pgi    | 1699 | 1353 | 314.7545352 |
| BH3344 | 500  | 1164 | 107.669684  |
| BH3345 | 5    | 228  | 5.496820707 |
| BH3346 | 48   | 726  | 16.57223301 |
| BH3347 | 4851 | 417  | 2915.89334  |
| BH3348 | 976  | 1170 | 209.0934219 |
| thiK   | 421  | 786  | 134.2566987 |
| BH3350 | 590  | 1182 | 125.115452  |
| BH3351 | 284  | 495  | 143.8101553 |
| BH3352 | 28   | 441  | 15.91460471 |
| BH3353 | 417  | 477  | 219.1260904 |
| BH3354 | 156  | 441  | 88.66708341 |
| BH3355 | 12   | 819  | 3.672601088 |
| hbs    | 22   | 273  | 20.19930598 |
| BH3357 | 281  | 429  | 164.1819623 |
| BH3358 | 18   | 594  | 7.595606795 |
| BH3359 | 87   | 1323 | 16.48298345 |
| BH3360 | 56   | 1296 | 10.83077265 |
| BH3361 | 38   | 429  | 22.20254294 |
| BH3362 | 32   | 552  | 14.53072604 |
| spsI   | 7    | 744  | 2.3583134   |
| spsJ   | 5    | 966  | 1.297386254 |
| rfdD   | 1    | 852  | 0.294196038 |
| rfdC   | 3    | 456  | 1.649046212 |
| spsA   | 3    | 702  | 1.071175317 |
| BH3368 | 3    | 1125 | 0.668413398 |
| BH3369 | 1    | 660  | 0.37978034  |
| BH3370 | 4    | 765  | 1.310614506 |
| BH3371 | 6    | 768  | 1.958242377 |
| BH3372 | 70   | 801  | 21.90493345 |
| cgeD   | 11   | 1311 | 2.103131401 |
| BH3374 | 5    | 798  | 1.570520202 |
| BH3375 | 1    | 261  | 0.960364078 |
| BH3376 | 7    | 1194 | 1.469501817 |
| BH3377 | 0    | 414  | 0           |
| BH3378 | 0    | 69   | 0           |
| BH3379 | 2    | 927  | 0.540787539 |

|        |      |      |             |
|--------|------|------|-------------|
| BH3380 | 19   | 1359 | 3.504374879 |
| BH3381 | 2    | 750  | 0.668413398 |
| BH3382 | 0    | 1071 | 0           |
| BH3383 | 1    | 174  | 1.440546116 |
| BH3384 | 9    | 1770 | 1.274517072 |
| BH3385 | 4    | 627  | 1.599075115 |
| BH3386 | 12   | 1140 | 2.638473939 |
| topB   | 466  | 2166 | 53.9267042  |
| BH3388 | 38   | 1131 | 8.421654219 |
| pbpC   | 1878 | 2019 | 233.1501414 |
| BH3390 | 1701 | 1062 | 401.4728778 |
| BH3391 | 216  | 1269 | 42.66468498 |
| BH3392 | 112  | 528  | 53.16924757 |
| BH3393 | 84   | 996  | 21.13958036 |
| BH3394 | 34   | 561  | 15.19121359 |
| BH3395 | 69   | 387  | 44.69043068 |
| BH3396 | 61   | 591  | 25.87133076 |
| BH3397 | 76   | 993  | 19.18407033 |
| BH3398 | 2    | 111  | 4.516306743 |
| BH3399 | 444  | 990  | 112.4149806 |
| BH3400 | 23   | 93   | 61.98995223 |
| BH3401 | 151  | 1428 | 26.504838   |
| BH3402 | 110  | 477  | 57.80304542 |
| BH3403 | 409  | 822  | 124.7176459 |
| BH3404 | 19   | 705  | 6.755241788 |
| BH3405 | 37   | 318  | 29.16426383 |
| BH3406 | 7    | 153  | 11.46787693 |
| BH3407 | 843  | 1203 | 175.6460394 |
| BH3408 | 218  | 993  | 55.02799122 |
| BH3409 | 0    | 1215 | 0           |
| BH3410 | 740  | 354  | 523.9681298 |
| BH3411 | 755  | 1095 | 172.8260669 |
| BH3412 | 618  | 861  | 179.9126655 |
| BH3413 | 143  | 240  | 149.3486186 |
| BH3414 | 127  | 237  | 134.3172493 |
| BH3415 | 767  | 1641 | 117.155639  |
| BH3416 | 26   | 306  | 21.29748572 |
| BH3417 | 0    | 786  | 0           |
| BH3418 | 0    | 285  | 0           |
| BH3419 | 2101 | 240  | 2194.275858 |
| thrB   | 2297 | 930  | 619.0909577 |



|        |       |      |             |
|--------|-------|------|-------------|
| thrC   | 1767  | 1065 | 415.8755191 |
| hom    | 2100  | 1296 | 406.1539745 |
| BH3423 | 83    | 1059 | 19.64529463 |
| BH3424 | 39    | 510  | 19.16773715 |
| BH3425 | 1521  | 1764 | 216.1260158 |
| BH3426 | 631   | 726  | 217.8558131 |
| BH3427 | 156   | 1194 | 32.74889764 |
| BH3428 | 206   | 780  | 66.19863461 |
| BH3429 | 573   | 648  | 221.6440261 |
| BH3430 | 103   | 456  | 56.61725328 |
| BH3431 | 1342  | 972  | 346.0689738 |
| BH3432 | 54    | 267  | 50.69427457 |
| BH3433 | 168   | 282  | 149.3263974 |
| BH3434 | 150   | 660  | 56.96705096 |
| BH3435 | 716   | 912  | 196.7861813 |
| BH3436 | 6     | 1014 | 1.483165824 |
| BH3437 | 6     | 171  | 8.794913131 |
| BH3438 | 37    | 105  | 88.32605616 |
| BH3439 | 214   | 1518 | 35.33608379 |
| BH3440 | 0     | 1167 | 0           |
| BH3441 | 1     | 1554 | 0.161296669 |
| BH3442 | 2     | 1080 | 0.464175971 |
| BH3443 | 47    | 624  | 18.87946497 |
| BH3444 | 0     | 786  | 0           |
| BH3445 | 0     | 285  | 0           |
| BH3446 | 4     | 603  | 1.662719895 |
| BH3447 | 6     | 1809 | 0.831359948 |
| BH3448 | 8     | 1008 | 1.989325589 |
| BH3449 | 569   | 1551 | 91.95532482 |
| dfrA   | 578   | 492  | 294.4687073 |
| thyB   | 606   | 795  | 191.0653392 |
| BH3452 | 100   | 303  | 82.72443044 |
| BH3453 | 510   | 1389 | 92.03316225 |
| BH3454 | 243   | 822  | 74.09874804 |
| BH3455 | 632   | 849  | 186.5888991 |
| BH3456 | 1     | 99   | 2.531868932 |
| BH3457 | 19    | 156  | 30.52849654 |
| BH3458 | 0     | 1173 | 0           |
| BH3459 | 0     | 96   | 0           |
| BH3460 | 11854 | 543  | 5471.942279 |
| BH3461 | 0     | 1284 | 0           |

|        |      |      |             |
|--------|------|------|-------------|
| BH3462 | 241  | 234  | 258.1532515 |
| BH3463 | 109  | 240  | 113.8391568 |
| BH3464 | 49   | 36   | 341.1693386 |
| BH3465 | 1    | 366  | 0.684849793 |
| BH3466 | 0    | 471  | 0           |
| BH3467 | 7148 | 1398 | 1281.603801 |
| BH3468 | 1379 | 441  | 783.7942822 |
| BH3469 | 3457 | 759  | 1141.652726 |
| BH3470 | 2698 | 1308 | 517.0238956 |
| BH3471 | 1391 | 792  | 440.2287105 |
| BH3472 | 78   | 189  | 103.4449306 |
| BH3473 | 7    | 462  | 3.797803398 |
| BH3474 | 108  | 123  | 220.0873384 |
| BH3475 | 71   | 594  | 29.96044903 |
| BH3476 | 81   | 1275 | 15.92396625 |
| BH3477 | 64   | 885  | 18.12646503 |
| BH3478 | 0    | 471  | 0           |
| BH3479 | 2047 | 741  | 692.4302761 |
| BH3480 | 414  | 657  | 157.9470016 |
| BH3481 | 666  | 1017 | 164.1457681 |
| BH3482 | 45   | 1242 | 9.081703777 |
| BH3483 | 33   | 237  | 34.90133249 |
| BH3484 | 1385 | 387  | 897.0470506 |
| BH3485 | 350  | 360  | 243.6923847 |
| BH3486 | 16   | 1785 | 2.246767724 |
| BH3487 | 10   | 1182 | 2.120600882 |
| BH3488 | 19   | 2382 | 1.999347381 |
| BH3489 | 42   | 270  | 38.99078155 |
| BH3490 | 46   | 324  | 35.58682443 |
| BH3491 | 41   | 249  | 41.27251403 |
| BH3492 | 31   | 390  | 19.9238609  |
| BH3493 | 68   | 852  | 20.00533057 |
| BH3494 | 48   | 681  | 17.66731448 |
| BH3495 | 1    | 627  | 0.399768779 |
| BH3496 | 17   | 816  | 5.221979672 |
| BH3497 | 1894 | 1887 | 251.5848521 |
| BH3498 | 174  | 402  | 108.4924732 |
| BH3499 | 0    | 1218 | 0           |
| BH3500 | 4966 | 1557 | 799.455909  |
| BH3501 | 1737 | 372  | 1170.39725  |
| BH3502 | 1062 | 621  | 428.6564183 |

|        |      |      |             |
|--------|------|------|-------------|
| BH3503 | 30   | 945  | 7.957302357 |
| BH3504 | 187  | 1200 | 39.06040794 |
| BH3505 | 223  | 687  | 81.3625479  |
| BH3506 | 157  | 894  | 44.01883535 |
| BH3507 | 0    | 1215 | 0           |
| rnpB   | 175  | 423  | 103.6988871 |
| BH3508 | 1066 | 981  | 272.3733495 |
| BH3509 | 1729 | 954  | 454.2793888 |
| BH3510 | 12   | 828  | 3.632681511 |
| BH3511 | 1    | 249  | 1.006646684 |
| BH3512 | 3    | 252  | 2.983988384 |
| BH3513 | 28   | 2874 | 2.44201137  |
| BH3514 | 12   | 804  | 3.741119765 |
| BH3515 | 7    | 1488 | 1.1791567   |
| BH3516 | 6    | 1038 | 1.448872972 |
| BH3517 | 5    | 747  | 1.677744473 |
| BH3518 | 21   | 2823 | 1.864596355 |
| BH3519 | 0    | 390  | 0           |
| BH3520 | 0    | 303  | 0           |
| BH3521 | 0    | 552  | 0           |
| BH3522 | 0    | 411  | 0           |
| BH3523 | 1    | 378  | 0.66310853  |
| BH3524 | 0    | 309  | 0           |
| BH3525 | 0    | 324  | 0           |
| BH3526 | 0    | 243  | 0           |
| BH3527 | 0    | 390  | 0           |
| BH3528 | 2    | 990  | 0.506373786 |
| BH3529 | 1    | 720  | 0.348131978 |
| BH3530 | 52   | 186  | 70.07559818 |
| BH3531 | 163  | 1473 | 27.73711402 |
| BH3532 | 0    | 1356 | 0           |
| BH3533 | 3    | 1407 | 0.534445681 |
| BH3534 | 10   | 480  | 5.221979672 |
| BH3535 | 11   | 1350 | 2.042374272 |
| BH3536 | 0    | 465  | 0           |
| BH3537 | 5    | 240  | 5.221979672 |
| BH3538 | 2    | 192  | 2.610989836 |
| BH3539 | 0    | 507  | 0           |
| BH3540 | 3    | 210  | 3.580786061 |
| BH3541 | 2    | 804  | 0.623519961 |
| BH3542 | 6    | 891  | 1.687912621 |

|        |       |      |             |
|--------|-------|------|-------------|
| BH3543 | 6     | 879  | 1.710955797 |
| BH3544 | 2     | 963  | 0.520571182 |
| BH3545 | 0     | 201  | 0           |
| BH3546 | 1     | 294  | 0.85256811  |
| BH3547 | 4     | 240  | 4.177583737 |
| BH3548 | 1     | 297  | 0.843956311 |
| BH3549 | 75    | 465  | 40.42822972 |
| BH3550 | 96    | 441  | 54.56435902 |
| BH3551 | 206   | 1137 | 45.41331134 |
| ssrA   | 84718 | 354  | 59985.85408 |
| BH3552 | 238   | 474  | 125.8563202 |
| BH3553 | 2724  | 2316 | 294.8118679 |
| BH3554 | 927   | 747  | 311.0538253 |
| BH3555 | 701   | 231  | 760.6457662 |
| eno    | 7592  | 1290 | 1475.172825 |
| pgm    | 6922  | 1533 | 1131.790005 |
| tpi    | 2851  | 756  | 945.2612091 |
| pgk    | 3480  | 1185 | 736.1008307 |
| gap    | 9567  | 1008 | 2378.984739 |
| BH3561 | 5874  | 1020 | 1443.478051 |
| BH3562 | 48    | 246  | 48.90829741 |
| sigL   | 400   | 1338 | 74.93423744 |
| clpP   | 908   | 585  | 389.0508752 |
| BH3565 | 0     | 1215 | 0           |
| chr    | 246   | 255  | 241.8083763 |
| BH3567 | 628   | 963  | 163.4593512 |
| BH3568 | 883   | 969  | 228.4090675 |
| BH3569 | 733   | 888  | 206.9033027 |
| BH3570 | 449   | 480  | 234.4668873 |
| trxB   | 2151  | 948  | 568.7330772 |
| BH3572 | 1523  | 1077 | 354.4545979 |
| BH3573 | 18    | 1056 | 4.272528822 |
| BH3574 | 8     | 1362 | 1.472276207 |
| BH3575 | 10    | 897  | 2.794370393 |
| BH3576 | 167   | 855  | 48.95834976 |
| hisI   | 51    | 636  | 20.09969534 |
| hisF   | 100   | 759  | 33.02437737 |
| hisA   | 53    | 735  | 18.07444392 |
| hisH   | 36    | 645  | 13.99004786 |
| hisB   | 49    | 585  | 20.99503622 |
| hisD   | 73    | 1275 | 14.35122884 |

|        |       |      |             |
|--------|-------|------|-------------|
| hisG   | 43    | 639  | 16.8672395  |
| hisZ   | 52    | 1194 | 10.91629921 |
| BH3585 | 0     | 567  | 0           |
| BH3586 | 471   | 501  | 235.6457414 |
| BH3587 | 836   | 648  | 323.3759263 |
| BH3588 | 1028  | 954  | 270.0978668 |
| lgt    | 769   | 870  | 221.5559927 |
| BH3590 | 803   | 933  | 215.7298869 |
| BH3591 | 529   | 360  | 368.3236328 |
| BH3592 | 452   | 198  | 572.2023786 |
| BH3593 | 3007  | 1095 | 688.3284547 |
| uvrA   | 1260  | 2874 | 109.8905117 |
| uvrB   | 456   | 1983 | 57.6392794  |
| BH3596 | 229   | 564  | 101.7730506 |
| BH3597 | 83    | 225  | 92.46385339 |
| BH3598 | 442   | 1197 | 92.55599057 |
| BH3599 | 1147  | 1440 | 199.6536894 |
| BH3600 | 5412  | 1386 | 978.7481899 |
| ftsX   | 2632  | 897  | 735.4782874 |
| ftsE   | 2081  | 672  | 776.2099783 |
| BH3603 | 232   | 336  | 173.0713263 |
| BH3604 | 254   | 882  | 72.18409995 |
| prfB   | 1619  | 867  | 468.0628423 |
| secA   | 3779  | 2517 | 376.3310833 |
| BH3607 | 139   | 252  | 138.2581285 |
| BH3608 | 383   | 564  | 170.2143161 |
| BH3609 | 6     | 279  | 5.390430629 |
| cspC   | 52122 | 198  | 65983.03623 |
| BH3611 | 4351  | 936  | 1165.170951 |
| fliT   | 340   | 360  | 236.7297451 |
| fliS   | 462   | 402  | 288.0662219 |
| fliD   | 2122  | 1599 | 332.6391254 |
| BH3615 | 179   | 333  | 134.7364845 |
| hag    | 33575 | 819  | 10275.63179 |
| csrA   | 163   | 228  | 179.1963551 |
| BH3618 | 354   | 456  | 194.587453  |
| BH3619 | 244   | 588  | 104.0133094 |
| flgL   | 984   | 1188 | 207.6132524 |
| flgK   | 859   | 1671 | 128.8525828 |
| BH3622 | 215   | 498  | 108.2145185 |
| flgM   | 98    | 261  | 94.1156796  |

|        |      |      |             |
|--------|------|------|-------------|
| BH3624 | 220  | 441  | 125.0433228 |
| comFC  | 191  | 534  | 89.65376335 |
| comFA  | 40   | 1326 | 7.561237534 |
| BH3627 | 3322 | 852  | 977.3192377 |
| degU   | 1157 | 711  | 407.8872898 |
| degS   | 2462 | 1134 | 544.1910667 |
| BH3630 | 80   | 642  | 31.23427093 |
| pcp    | 161  | 606  | 66.59316651 |
| BH3632 | 149  | 963  | 38.78255308 |
| BH3633 | 38   | 483  | 19.72027106 |
| BH3634 | 64   | 903  | 17.76514015 |
| BH3635 | 0    | 1356 | 0           |
| BH3636 | 1442 | 1833 | 197.1874222 |
| BH3637 | 195  | 909  | 53.77087979 |
| BH3638 | 104  | 969  | 26.90208723 |
| BH3639 | 89   | 927  | 24.06504548 |
| BH3640 | 55   | 1023 | 13.47607657 |
| BH3641 | 6    | 459  | 3.276536265 |
| BH3642 | 6    | 921  | 1.632931754 |
| BH3643 | 3    | 1002 | 0.750464144 |
| BH3644 | 9    | 1674 | 1.347607657 |
| BH3645 | 1    | 969  | 0.258673916 |
| BH3646 | 0    | 990  | 0           |
| BH3647 | 2542 | 1080 | 589.9676589 |
| BH3648 | 2689 | 3342 | 201.6790425 |
| BH3649 | 693  | 936  | 185.5811237 |
| tuaA   | 273  | 618  | 110.7262486 |
| BH3651 | 188  | 837  | 56.30005323 |
| BH3652 | 2002 | 894  | 561.3102444 |
| BH3653 | 1710 | 1656 | 258.8285576 |
| BH3654 | 892  | 1590 | 140.619045  |
| BH3655 | 1161 | 1635 | 177.9880631 |
| tupA   | 766  | 1470 | 130.6134344 |
| BH3657 | 1195 | 2199 | 136.2131669 |
| BH3658 | 1374 | 2547 | 135.2179047 |
| tagH   | 523  | 1605 | 81.67761849 |
| tagG   | 120  | 771  | 39.01245513 |
| tuaG   | 86   | 774  | 27.85055825 |
| BH3662 | 181  | 1146 | 39.58862076 |
| BH3663 | 226  | 1122 | 50.48844517 |
| BH3664 | 0    | 1173 | 0           |

|        |      |      |             |
|--------|------|------|-------------|
| lytC   | 3040 | 1767 | 431.2344503 |
| BH3666 | 645  | 798  | 202.5971061 |
| BH3667 | 598  | 768  | 195.1714902 |
| BH3668 | 483  | 708  | 170.9977072 |
| BH3669 | 220  | 699  | 78.88999332 |
| lytR   | 2831 | 915  | 775.5239056 |
| lytE   | 3215 | 1251 | 644.1693868 |
| BH3672 | 475  | 1200 | 99.21761376 |
| BH3673 | 479  | 684  | 175.5318079 |
| BH3674 | 810  | 1242 | 163.470668  |
| BH3675 | 29   | 396  | 18.35604976 |
| BH3676 | 63   | 1023 | 15.43623316 |
| trkA   | 54   | 1053 | 12.85410381 |
| BH3678 | 223  | 1818 | 30.74591331 |
| BH3679 | 13   | 774  | 4.209968107 |
| BH3680 | 1    | 1317 | 0.190322722 |
| BH3681 | 3    | 882  | 0.85256811  |
| BH3682 | 6    | 882  | 1.705136219 |
| xynB   | 22   | 1587 | 3.474738836 |
| BH3684 | 18   | 624  | 7.230433392 |
| BH3685 | 5    | 507  | 2.47194304  |
| BH3686 | 4    | 531  | 1.888173441 |
| BH3687 | 3    | 213  | 3.530352454 |
| BH3688 | 10   | 822  | 3.049331195 |
| BH3689 | 24   | 903  | 6.661927555 |
| BH3690 | 22   | 1263 | 4.366120771 |
| BH3691 | 17   | 2109 | 2.020453017 |
| BH3692 | 132  | 1014 | 32.62964813 |
| BH3693 | 54   | 1218 | 11.11278433 |
| BH3694 | 7    | 180  | 9.747695387 |
| BH3695 | 16   | 99   | 40.50990291 |
| BH3696 | 65   | 1113 | 14.63843358 |
| BH3697 | 46   | 3219 | 3.581898451 |
| BH3698 | 8    | 216  | 9.283519416 |
| BH3699 | 31   | 438  | 17.74042409 |
| glpQ   | 1    | 855  | 0.293163771 |
| BH3701 | 71   | 2019 | 8.814515464 |
| BH3702 | 10   | 840  | 2.983988384 |
| BH3703 | 35   | 510  | 17.20181539 |
| BH3704 | 0    | 1284 | 0           |
| BH3705 | 483  | 1686 | 71.80686638 |

|         |      |      |             |
|---------|------|------|-------------|
| BH3706  | 53   | 1116 | 11.90386764 |
| BH3707  | 128  | 441  | 72.75247869 |
| BH3708  | 1578 | 1167 | 338.9319865 |
| BH3709  | 527  | 1032 | 127.9992227 |
| BH3710  | 200  | 1110 | 45.16306743 |
| BH3711  | 41   | 1452 | 7.077724514 |
| BH3712  | 151  | 1188 | 31.85935072 |
| BH3713  | 103  | 912  | 28.30862664 |
| BH3714  | 92   | 816  | 28.26012528 |
| BH3715  | 58   | 849  | 17.12366479 |
| BH3716  | 116  | 624  | 46.5961263  |
| gtaB    | 929  | 882  | 264.0119246 |
| BH3718  | 755  | 1827 | 103.5821255 |
| BH3719  | 0    | 57   | 0           |
| BH3720  | 71   | 246  | 72.34352326 |
| BH3721  | 22   | 330  | 16.71033495 |
| BH3722  | 43   | 141  | 76.44089392 |
| BH3723  | 56   | 645  | 21.76229668 |
| kdgK    | 78   | 954  | 20.49380701 |
| kdgR    | 213  | 756  | 70.62105842 |
| BH3726  | 71   | 459  | 38.7723458  |
| rbsR    | 23   | 996  | 5.788218431 |
| rbsK    | 33   | 885  | 9.346458531 |
| rbsD    | 9    | 390  | 5.784346713 |
| rbsA    | 34   | 1500 | 5.681513883 |
| rbsC    | 43   | 945  | 11.40546671 |
| rbsB    | 147  | 936  | 39.36569291 |
| BH3733  | 70   | 603  | 29.09759817 |
| BH3734  | 4983 | 282  | 4429.127609 |
| BH3735  | 180  | 423  | 106.6617124 |
| BH3736  | 281  | 303  | 232.4556495 |
| flhP    | 3018 | 843  | 897.362827  |
| flhO    | 2987 | 825  | 907.5230999 |
| mbl     | 1716 | 1005 | 427.9841011 |
| spoIIID | 1    | 285  | 0.879491313 |
| BH3741  | 4    | 660  | 1.519121359 |
| BH3742  | 6    | 1932 | 0.778431752 |
| BH3743  | 6    | 1665 | 0.903261349 |
| BH3744  | 0    | 303  | 0           |
| BH3745  | 0    | 177  | 0           |
| spoIIQ  | 294  | 855  | 86.19014869 |



|        |      |      |             |
|--------|------|------|-------------|
| BH3747 | 132  | 432  | 76.58903519 |
| spoIID | 38   | 1011 | 9.421257093 |
| murA   | 4028 | 1323 | 763.1431879 |
| BH3750 | 1308 | 750  | 437.1423623 |
| BH3751 | 398  | 234  | 426.3277763 |
| BH3752 | 5    | 1392 | 0.900341323 |
| atpC   | 3866 | 402  | 2410.528168 |
| atpD   | 9983 | 1413 | 1770.905242 |
| atpG   | 5875 | 858  | 1716.314997 |
| atpA   | 7579 | 1509 | 1258.922749 |
| atpH   | 1685 | 552  | 765.1335432 |
| atpF   | 2086 | 489  | 1069.256402 |
| atpE   | 1117 | 213  | 1314.467897 |
| atpB   | 2571 | 714  | 902.5687217 |
| BH3761 | 886  | 393  | 565.0899529 |
| BH3762 | 375  | 228  | 412.261553  |
| BH3763 | 108  | 2274 | 11.90446025 |
| upp    | 1236 | 630  | 491.7612857 |
| glyA   | 6603 | 1242 | 1332.588668 |
| BH3766 | 1399 | 567  | 618.4592221 |
| BH3767 | 2022 | 438  | 1157.133468 |
| mcpA   | 1698 | 1302 | 326.8911146 |
| BH3769 | 450  | 486  | 232.0879854 |
| BH3770 | 75   | 546  | 34.4306352  |
| BH3771 | 298  | 1047 | 71.34211769 |
| BH3772 | 70   | 438  | 40.05902214 |
| spoIIR | 94   | 633  | 37.22207311 |
| BH3774 | 1104 | 870  | 318.0725825 |
| prfA   | 2386 | 1071 | 558.4153948 |
| BH3776 | 170  | 1311 | 32.50293983 |
| BH3777 | 284  | 552  | 128.9601936 |
| BH3778 | 815  | 456  | 447.9908876 |
| tdk    | 1466 | 615  | 597.4963667 |
| rpmE   | 5604 | 246  | 5710.043723 |
| rho    | 1578 | 1272 | 310.9541103 |
| BH3782 | 172  | 345  | 124.964244  |
| BH3783 | 1197 | 966  | 310.5942692 |
| murZ   | 1271 | 1287 | 247.5388779 |
| BH3785 | 170  | 639  | 66.68443524 |
| fbaA   | 7485 | 864  | 2171.473213 |
| spo0F  | 158  | 363  | 109.100534  |

|        |      |      |             |
|--------|------|------|-------------|
| BH3788 | 90   | 537  | 42.00922194 |
| BH3789 | 22   | 1041 | 5.297224336 |
| BH3790 | 10   | 1014 | 2.47194304  |
| BH3791 | 277  | 1005 | 69.08601166 |
| ctrA   | 3583 | 1599 | 561.6616334 |
| rpoE   | 799  | 495  | 404.5926553 |
| BH3794 | 280  | 696  | 100.8382281 |
| BH3795 | 174  | 390  | 111.8307031 |
| BH3796 | 105  | 3264 | 8.063350964 |
| BH3797 | 193  | 609  | 79.4358287  |
| acdA   | 12   | 1143 | 2.631548811 |
| mmgC   | 18   | 1140 | 3.957710909 |
| mmgB   | 3    | 855  | 0.879491313 |
| mmgA   | 5    | 1179 | 1.062998406 |
| BH3802 | 63   | 2103 | 7.508923693 |
| BH3803 | 71   | 1197 | 14.86759125 |
| BH3804 | 93   | 504  | 46.25181995 |
| BH3805 | 115  | 780  | 36.95554845 |
| BH3806 | 42   | 162  | 64.98463591 |
| BH3807 | 60   | 480  | 31.33187803 |
| argS   | 1705 | 1671 | 255.7551265 |
| BH3809 | 432  | 435  | 248.9263689 |
| BH3810 | 41   | 165  | 62.28397572 |
| BH3811 | 159  | 828  | 48.13303002 |
| BH3812 | 60   | 2064 | 7.286483263 |
| BH3813 | 56   | 540  | 25.99385437 |
| BH3814 | 123  | 186  | 165.7557418 |
| BH3815 | 79   | 459  | 43.14106082 |
| BH3816 | 629  | 3282 | 48.03839435 |
| BH3817 | 155  | 501  | 77.54796159 |
| BH3818 | 305  | 1299 | 58.8527963  |
| BH3819 | 37   | 1002 | 9.255724448 |
| BH3820 | 1798 | 1242 | 362.8645198 |
| BH3821 | 49   | 225  | 54.58709417 |
| BH3822 | 438  | 837  | 131.1671453 |
| pta    | 3228 | 993  | 814.8181453 |
| BH3824 | 204  | 741  | 69.00624149 |
| BH3825 | 1207 | 786  | 384.911723  |
| cwlJ   | 19   | 432  | 11.02417931 |
| BH3827 | 53   | 597  | 22.25245609 |
| BH3828 | 106  | 366  | 72.59407806 |

|        |      |      |             |
|--------|------|------|-------------|
| BH3829 | 334  | 621  | 134.8128472 |
| BH3830 | 125  | 303  | 103.4055381 |
| BH3831 | 45   | 1056 | 10.68132206 |
| BH3832 | 46   | 798  | 14.44878586 |
| BH3833 | 49   | 1011 | 12.14846309 |
| BH3834 | 92   | 1266 | 18.21505705 |
| BH3835 | 171  | 342  | 125.3275121 |
| BH3836 | 107  | 1440 | 18.62506083 |
| BH3837 | 163  | 1032 | 39.58989239 |
| citT   | 49   | 693  | 17.72308252 |
| citS   | 43   | 1617 | 6.665532494 |
| BH3840 | 4    | 999  | 1.003623721 |
| BH3841 | 7    | 1446 | 1.213406065 |
| BH3842 | 364  | 1593 | 57.27459437 |
| BH3843 | 533  | 1005 | 132.9344556 |
| BH3844 | 2    | 1179 | 0.425199363 |
| BH3845 | 4    | 1311 | 0.764775055 |
| BH3846 | 2    | 987  | 0.507912916 |
| BH3847 | 3    | 822  | 0.914799359 |
| BH3848 | 9    | 456  | 4.947138636 |
| BH3849 | 369  | 837  | 110.5038279 |
| ung    | 244  | 675  | 90.6071495  |
| mtlD   | 37   | 1125 | 8.243765242 |
| BH3852 | 19   | 438  | 10.87316315 |
| BH3853 | 19   | 2103 | 2.264596035 |
| BH3854 | 16   | 1407 | 2.850376964 |
| BH3855 | 60   | 456  | 32.98092424 |
| BH3856 | 123  | 645  | 47.7993302  |
| BH3857 | 526  | 264  | 499.4111468 |
| BH3858 | 2    | 360  | 1.392527912 |
| BH3859 | 6    | 639  | 2.353568303 |
| BH3860 | 35   | 627  | 13.99190725 |
| BH3861 | 218  | 1401 | 39.00270898 |
| BH3862 | 1    | 39   | 6.427051904 |
| BH3863 | 2790 | 1680 | 416.2663795 |
| BH3864 | 55   | 681  | 20.24379785 |
| BH3865 | 753  | 2841 | 66.43549217 |
| BH3866 | 151  | 927  | 40.82945918 |
| BH3867 | 7064 | 1368 | 1294.318049 |
| BH3868 | 212  | 1662 | 31.97284304 |
| BH3869 | 476  | 1014 | 117.6644887 |

|        |     |      |             |
|--------|-----|------|-------------|
| BH3870 | 570 | 366  | 390.364382  |
| BH3871 | 19  | 1527 | 3.118824794 |
| BH3872 | 73  | 393  | 46.5593302  |
| BH3873 | 90  | 1632 | 13.82288737 |
| BH3874 | 9   | 279  | 8.085645943 |
| BH3875 | 280 | 1377 | 50.96834189 |
| BH3876 | 53  | 552  | 24.06651501 |
| lrpC   | 17  | 465  | 9.163732069 |
| BH3878 | 14  | 636  | 5.517563427 |
| BH3879 | 56  | 261  | 53.78038834 |
| BH3880 | 130 | 1275 | 25.55698286 |
| BH3881 | 106 | 1197 | 22.19668552 |
| BH3882 | 40  | 465  | 21.56172252 |
| BH3883 | 80  | 309  | 64.89450466 |
| BH3884 | 51  | 387  | 33.03205746 |
| BH3885 | 29  | 609  | 11.93595354 |
| BH3886 | 57  | 1236 | 11.55933364 |
| BH3887 | 30  | 909  | 8.272443044 |
| BH3888 | 107 | 684  | 39.21065438 |
| BH3889 | 123 | 912  | 33.80544735 |
| fhuD   | 16  | 927  | 4.326300311 |
| BH3891 | 102 | 1734 | 14.74441319 |
| BH3892 | 44  | 711  | 15.51170333 |
| BH3893 | 113 | 849  | 33.36162278 |
| BH3894 | 80  | 1038 | 19.3183063  |
| BH3895 | 17  | 1554 | 2.74204338  |
| BH3896 | 15  | 741  | 5.073988345 |
| BH3897 | 10  | 1284 | 1.952141933 |
| BH3898 | 22  | 1578 | 3.494556738 |
| BH3899 | 46  | 1680 | 6.863173283 |
| BH3900 | 24  | 1740 | 3.457310679 |
| BH3901 | 8   | 984  | 2.037845726 |
| BH3902 | 231 | 960  | 60.31386521 |
| mcpB   | 596 | 2088 | 71.54712378 |
| BH3904 | 3   | 1428 | 0.526586185 |
| BH3905 | 1   | 207  | 1.210893837 |
| BH3906 | 3   | 660  | 1.139341019 |
| bioF   | 21  | 1188 | 4.430770631 |
| BH3908 | 25  | 726  | 8.631371358 |
| BH3909 | 57  | 816  | 17.50899066 |
| BH3910 | 95  | 282  | 84.44052235 |

|        |      |      |             |
|--------|------|------|-------------|
| BH3911 | 109  | 696  | 39.25488167 |
| BH3912 | 200  | 1005 | 49.88159686 |
| BH3913 | 28   | 762  | 9.210420838 |
| BH3914 | 49   | 1947 | 6.308215813 |
| tlpA   | 1979 | 2004 | 247.5280903 |
| BH3916 | 141  | 948  | 37.2809688  |
| BH3917 | 147  | 786  | 46.87822972 |
| BH3918 | 133  | 1401 | 23.79523071 |
| BH3919 | 27   | 1293 | 5.234095634 |
| BH3920 | 6    | 330  | 4.557364077 |
| BH3921 | 7    | 312  | 5.623670416 |
| BH3922 | 4    | 903  | 1.110321259 |
| BH3923 | 6    | 1437 | 1.046576302 |
| mmgD   | 3    | 1107 | 0.679281909 |
| BH3925 | 22   | 870  | 6.338402912 |
| BH3926 | 22   | 1428 | 3.861632026 |
| BH3927 | 192  | 918  | 52.42458023 |
| BH3928 | 21   | 228  | 23.08664697 |
| BH3929 | 76   | 861  | 22.12518216 |
| BH3930 | 177  | 1833 | 24.20400398 |
| BH3931 | 8    | 516  | 3.886124407 |
| BH3932 | 73   | 462  | 39.605664   |
| BH3933 | 9    | 240  | 9.399563409 |
| BH3934 | 10   | 234  | 10.71175317 |
| BH3935 | 1988 | 462  | 1078.576165 |
| lctP   | 120  | 1575 | 19.09752566 |
| lctE   | 207  | 933  | 55.61156486 |
| BH3938 | 14   | 291  | 12.0590046  |
| BH3939 | 580  | 1479 | 98.29608794 |
| BH3940 | 276  | 1548 | 44.69043068 |
| BH3941 | 38   | 252  | 37.7971862  |
| BH3942 | 145  | 1263 | 28.77670508 |
| rocD   | 96   | 1203 | 20.00239595 |
| rocR   | 64   | 1440 | 11.1402233  |
| BH3945 | 4    | 138  | 7.265363022 |
| BH3946 | 4    | 1422 | 0.705077424 |
| BH3947 | 6    | 1383 | 1.087440452 |
| BH3948 | 19   | 906  | 5.256562319 |
| BH3949 | 65   | 1047 | 15.56120017 |
| BH3950 | 0    | 945  | 0           |
| BH3952 | 23   | 957  | 6.024101941 |

|        |      |      |             |
|--------|------|------|-------------|
| BH3951 | 27   | 555  | 12.19402821 |
| BH3953 | 27   | 474  | 14.27781784 |
| BH3954 | 3    | 90   | 8.355167475 |
| BH3955 | 24   | 768  | 7.832969508 |
| BH3956 | 138  | 165  | 209.6387475 |
| BH3957 | 410  | 1233 | 83.348386   |
| BH3958 | 726  | 1140 | 159.6276733 |
| BH3959 | 2    | 252  | 1.989325589 |
| BH3960 | 872  | 1503 | 145.4232742 |
| BH3961 | 383  | 888  | 108.1090927 |
| BH3962 | 93   | 270  | 86.33673057 |
| BH3963 | 19   | 2988 | 1.593857249 |
| BH3964 | 0    | 198  | 0           |
| BH3965 | 212  | 1545 | 34.39408747 |
| BH3966 | 7    | 765  | 2.293575385 |
| BH3967 | 0    | 585  | 0           |
| BH3968 | 7    | 132  | 13.29231189 |
| BH3969 | 7    | 258  | 6.800717712 |
| tgl    | 7    | 855  | 2.052146397 |
| BH3971 | 44   | 1674 | 6.588304102 |
| cydD   | 90   | 1728 | 13.05494918 |
| BH3973 | 23   | 102  | 56.52025056 |
| BH3974 | 220  | 1017 | 54.22232579 |
| BH3975 | 241  | 1347 | 44.84622186 |
| BH3976 | 3    | 342  | 2.198728283 |
| BH3977 | 3    | 354  | 2.124195121 |
| BH3978 | 9    | 750  | 3.007860291 |
| BH3979 | 8    | 774  | 2.590749605 |
| BH3980 | 24   | 339  | 17.74548844 |
| BH3981 | 15   | 294  | 12.78852165 |
| BH3982 | 320  | 291  | 275.6343909 |
| BH3983 | 2    | 105  | 4.774381414 |
| BH3984 | 18   | 627  | 7.195838017 |
| BH3985 | 28   | 1365 | 5.141641523 |
| BH3986 | 137  | 1317 | 26.07421285 |
| BH3987 | 46   | 432  | 26.69011832 |
| BH3988 | 5    | 156  | 8.03381488  |
| BH3989 | 73   | 1602 | 11.42185816 |
| BH3990 | 6166 | 666  | 2320.628948 |
| BH3991 | 9    | 438  | 5.150445704 |
| BH3992 | 42   | 780  | 13.496809   |

|          |      |      |             |
|----------|------|------|-------------|
| BH3993   | 7    | 219  | 8.011804428 |
| BH3994   | 6    | 246  | 6.113537177 |
| BH3995   | 35   | 1035 | 8.476256858 |
| BH3996   | 71   | 567  | 31.38713707 |
| BH3997   | 73   | 306  | 59.79678683 |
| BH3998   | 407  | 1500 | 68.01106324 |
| BH3999   | 209  | 726  | 72.15826455 |
| BH4000   | 51   | 786  | 16.26387562 |
| BH4001   | 273  | 1875 | 36.49537153 |
| BH4002   | 24   | 975  | 6.169969827 |
| BH4003   | 39   | 795  | 12.29628421 |
| BH4004   | 63   | 1098 | 14.38184565 |
| BH4005   | 2    | 543  | 0.923222925 |
| BH4006   | 2    | 267  | 1.877565725 |
| BH4007   | 26   | 480  | 13.57714715 |
| BH4008   | 10   | 159  | 15.76446693 |
| BH4009   | 20   | 354  | 14.1613008  |
| BH4010   | 1340 | 624  | 538.2655969 |
| BH4011   | 1942 | 978  | 497.7219398 |
| BH4012   | 196  | 132  | 372.184733  |
| BH4013   | 185  | 135  | 343.4902184 |
| BH4014   | 102  | 1113 | 22.97108039 |
| BH4015   | 229  | 411  | 139.6593687 |
| BH4016   | 266  | 264  | 252.5539259 |
| BH4017   | 857  | 1845 | 116.4289191 |
| BH4018   | 264  | 489  | 135.3229579 |
| BH4019   | 405  | 573  | 177.1645459 |
| BH4020   | 62   | 495  | 31.39517475 |
| BH4021   | 91   | 570  | 40.01685475 |
| BH4022   | 265  | 1221 | 54.40096759 |
| BH4023   | 868  | 795  | 273.671146  |
| BH4024   | 878  | 789  | 278.9291651 |
| BH4025   | 1193 | 1320 | 226.5389727 |
| BH4026   | 1009 | 1824 | 138.6573023 |
| BH4027   | 311  | 711  | 109.6395394 |
| trnS-Thr | 55   | 73   | 188.8496758 |
| trnS-Phe | 138  | 76   | 455.1367545 |
| trnS-Asp | 51   | 77   | 166.0182628 |
| trnS-Glu | 226  | 75   | 755.3071397 |
| trnS-Lys | 230  | 76   | 758.5612576 |
| purA     | 1240 | 1287 | 241.5013443 |

|         |       |      |             |
|---------|-------|------|-------------|
| dnaC    | 702   | 1365 | 128.9082982 |
| rplI    | 476   | 444  | 268.7202512 |
| BH4031  | 2377  | 1965 | 303.2096655 |
| BH4032  | 572   | 939  | 152.6886836 |
| BH4033  | 472   | 1383 | 85.54531558 |
| BH4034  | 34    | 291  | 29.28615404 |
| BH4035  | 14    | 138  | 25.42877058 |
| BH4036  | 921   | 2124 | 108.6879837 |
| BH4037  | 179   | 369  | 121.5914616 |
| BH4038  | 500   | 1473 | 85.08317184 |
| BH4039  | 606   | 549  | 276.6793164 |
| BH4040  | 12    | 543  | 5.539337552 |
| BH4041  | 37    | 1284 | 7.222925153 |
| BH4042  | 4     | 474  | 2.115232272 |
| BH4043  | 149   | 636  | 58.72263933 |
| BH4044  | 23    | 474  | 12.16258556 |
| BH4045  | 14    | 1344 | 2.610989836 |
| BH4046  | 17    | 294  | 14.49365786 |
| BH4047  | 42    | 510  | 20.64217847 |
| rpsR    | 7799  | 234  | 8354.096299 |
| ssb     | 15050 | 507  | 7440.54855  |
| rpsF    | 8812  | 288  | 7669.347478 |
| BH4051  | 1092  | 1101 | 248.6060731 |
| BH4052  | 74    | 198  | 93.67915047 |
| BH4053  | 15    | 1026 | 3.664547138 |
| BH4054  | 92    | 651  | 35.42282985 |
| BH4055  | 199   | 711  | 70.15520369 |
| BH4056  | 656   | 1152 | 142.734111  |
| spo0J   | 876   | 867  | 253.2569795 |
| soj     | 1077  | 762  | 354.2722587 |
| BH4059  | 1129  | 852  | 332.1473267 |
| gidB    | 709   | 717  | 247.8583155 |
| gidA    | 1971  | 1899 | 260.1585323 |
| thdF    | 1033  | 1377 | 188.0367756 |
| jag     | 2813  | 624  | 1129.956063 |
| spoIIIJ | 2301  | 774  | 745.164355  |
| rnpA    | 1178  | 360  | 820.1989404 |
| rpmH    | 1564  | 138  | 2840.756941 |



Fig. S1

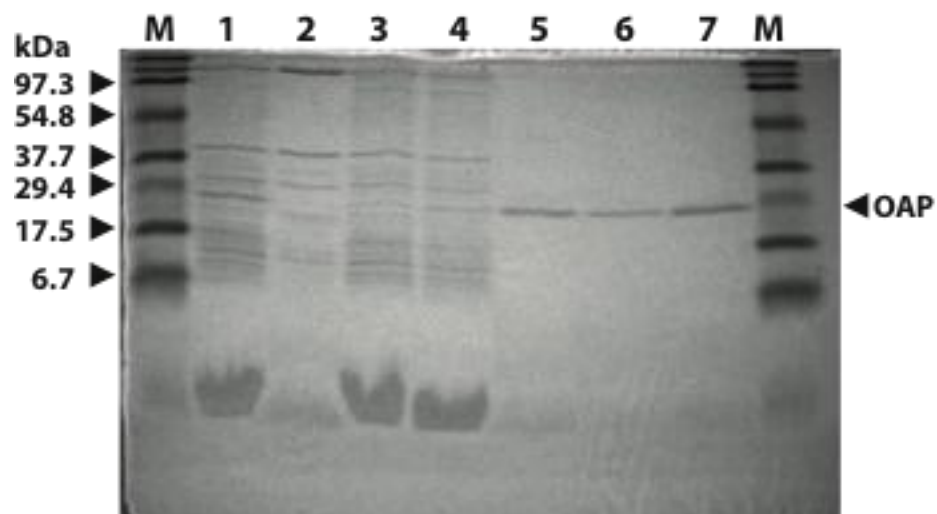

**Lanes**

M = markers

1 = membrane fraction - solubilized proteins

2 = membrane fraction - pellet

3 = nickel column flow-through I

4 = nickel column flow-through II

5 = elution I (10 mM imidazole)

6 = elution II (10 mM imidazole)

7 = elution III (200 mM imidazole)

**Fig. S2**

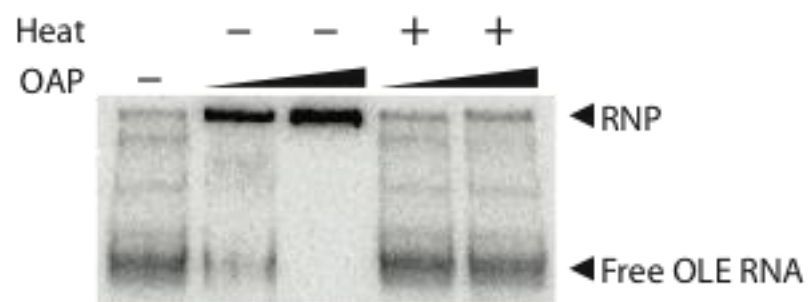

**Table S2**

| <b>Construct</b>                      | <b><math>K_D</math> (nM)</b> | <b>n</b> |
|---------------------------------------|------------------------------|----------|
| OLE <sub>285-637</sub> U286A          | 118                          | 2.26     |
| OLE <sub>285-637</sub> A287U          | 263                          | 0.91     |
| OLE <sub>285-637</sub> G288U          | 132                          | 2.03     |
| OLE <sub>285-637</sub> C289U          | 88                           | 1.03     |
| OLE <sub>285-637</sub> C290U          | 256                          | 1.40     |
| OLE <sub>285-637</sub> U291A          | 103                          | 1.78     |
| OLE <sub>285-637</sub> G292U          | 131                          | 1.00     |
| OLE <sub>1-637</sub> A287U            | 115                          | 1.62     |
| OLE <sub>1-637</sub> C289U            | 78                           | 1.78     |
| OLE <sub>1-637</sub> G292U            | 121                          | 1.59     |
| OLE <sub>1-637</sub> A287U, G288C     | 113                          | 1.97     |
| OLE <sub>1-637</sub> A432U            | 50                           | 1.95     |
| OLE <sub>1-637</sub> A434U            | 63                           | 1.62     |
| OLE <sub>1-637</sub> C435U            | 74                           | 1.55     |
| OLE-AS                                | 38                           | 1.80     |
| HEARO RNA                             | 59                           | 1.38     |
| RNase P RNA                           | 216                          | 1.20     |
| OLE <sub>285-438</sub>                | n/d <sup>a</sup>             | n/d      |
| Sites A+B (GGUAGCCUGUAAUAAUAAUAGACUG) | n/d                          | n/d      |
| Site A (GGUAGCCUGUAAUAA)              | n/d                          | n/d      |
| Site B (GGUAGACUGUAAUAA)              | n/d                          | n/d      |

(a) No binding was observed.

Fig. S3

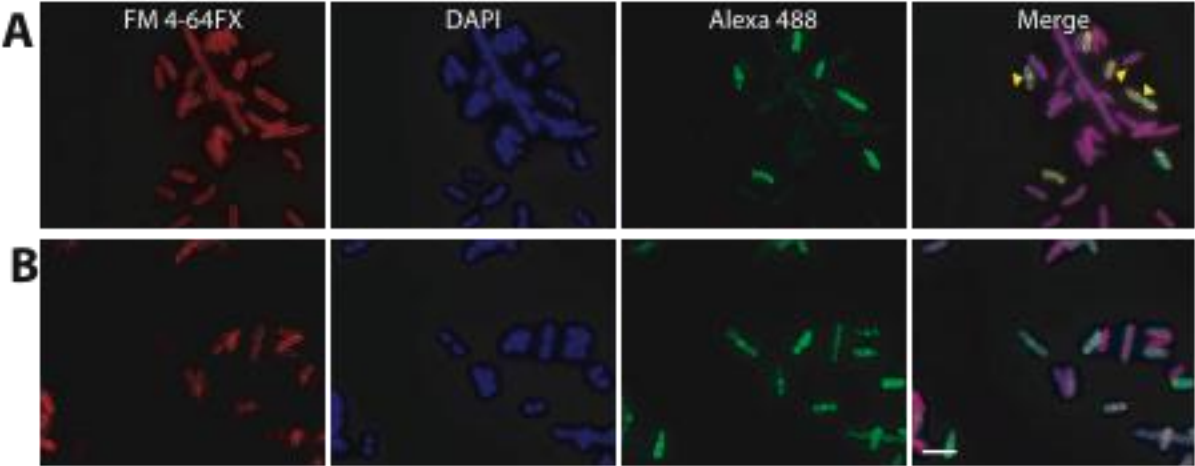

**Table S3**

| <b>Primer</b> | <b>Purpose</b>                             | <b>Sequence (5' - 3')</b>                   |
|---------------|--------------------------------------------|---------------------------------------------|
| OLE1          | KpnI-OAP                                   | GCGGGTACCATGAAATCTCTAGGAAAATCAATAAAT        |
| OLE2          | 3' BamHI-OAP                               | GCGGGATCCTCACTTTTCGAGAATTTTTCTCTTT          |
| OLE3          | 5' OLE <sub>1-637</sub>                    | TAATACGACTCACTATAGGTGTCTTTTAGAATAAGAGTGG    |
| OLE4          | 3' OLE <sub>1-637</sub>                    | CGTTCCGACTGCGTATGTATGA                      |
| OLE5          | 5' OLE <sub>285-637</sub>                  | TAATACGACTCACTATAGGGGTAGCCTGCCTTGAGTGG      |
| OLE6          | 5' OLE <sub>292-637</sub>                  | TAATACGACTCACTATAGGGGCCTTGAGTGGAGTAGAGG     |
| OLE7          | 3' OLE <sub>1-438</sub>                    | ACAGTCTAGGAGTTTTCTCCGG                      |
| OLE8          | 3' OLE <sub>1-436</sub>                    | AGTCTAGGAGTTTTCTCCGGC                       |
| OLE9          | 5' OLE <sub>285-637</sub> U286A            | TAATACGACTCACTATAGGAAGCCTGCCTTGAGTGG        |
| OLE10         | 5' OLE <sub>285-637</sub> A287U            | TAATACGACTCACTATAGGTTGCCTGCCTTGAGTGG        |
| OLE11         | 5' OLE <sub>285-637</sub> G288U            | TAATACGACTCACTATAGGTATCCTGCCTTGAGTGG        |
| OLE12         | 5' OLE <sub>285-637</sub> C289U            | TAATACGACTCACTATAGGTAGTCTGCCTTGAGTGG        |
| OLE13         | 5' OLE <sub>285-637</sub> C290U            | TAATACGACTCACTATAGGTAGCTTGCCTTGAGTGG        |
| OLE14         | 5' OLE <sub>285-637</sub> U291A            | TAATACGACTCACTATAGGTAGCCAGCCTTGAGTGG        |
| OLE15         | 5' OLE <sub>285-637</sub> G292U            | TAATACGACTCACTATAGGTAGCCTTCCTTGAGTGG        |
| OLE16         | 5' A287U (OLE <sub>1-637</sub> )           | GTCAGCAGCGTTGCCTGCCTTGAGTG                  |
| OLE17         | 3' A287U (OLE <sub>1-637</sub> )           | CACTCAAGGCAGGCAACGCTGCTGAC                  |
| OLE18         | 5' C289U (OLE <sub>1-637</sub> )           | GTCAGCAGCGTAGTCTGCCTTGAGTG                  |
| OLE19         | 3' C289U (OLE <sub>1-637</sub> )           | CACTCAAGGCAGACTACGCTGCTGAC                  |
| OLE20         | 5' G292U (OLE <sub>1-637</sub> )           | CAGCAGCGTAGCCTTCCTTGAGTGGAG                 |
| OLE21         | 3' G292U (OLE <sub>1-637</sub> )           | CTCCACTCAAGGAAGGCTACGCTGCTG                 |
| OLE22         | 5' A432U (OLE <sub>1-637</sub> )           | CCGAGGAAAACCTCCTTGACTGTTCCATGG              |
| OLE23         | 3' A432U (OLE <sub>1-637</sub> )           | CCATGGAACAGTCAAGGAGTTTTCTCCGG               |
| OLE24         | 5' A434U (OLE <sub>1-637</sub> )           | GAGGAAAACCTCCTAGTCTGTTCCATGGGGAC            |
| OLE25         | 3' A434U (OLE <sub>1-637</sub> )           | GTCCCCATGGAACAGACTAGGAGTTTTCTC              |
| OLE26         | 5' C435U (OLE <sub>1-637</sub> )           | GAGGAAAACCTCCTAGATTGTTCCATGGGGAC            |
| OLE27         | 3' C435U (OLE <sub>1-637</sub> )           | GTCCCCATGGAACAATCTAGGAGTTTTCTC              |
| OLE28         | 5' A287U, G288C<br>(OLE <sub>1-637</sub> ) | CTTGTCAGCAGCGTTCCTGCCTTGAGTGGAG             |
| OLE29         | 3' A287U, G288C<br>(OLE <sub>1-637</sub> ) | CTCCACTCAAGGCAGGGAACGCTGCTGACAAG            |
| OLE30         | Synthetic Site A                           | TTATTACAGGCTACCCTATAGTGAGTCGTATTA           |
| OLE31         | Synthetic Site B                           | TTATTACAGTCTACCCTATAGTGAGTCGTATTA           |
| OLE32         | Synthetic A+B                              | CAGTCTATTATTATTACAGGCTACCCTATAGTGAGTCGTATTA |
| OLE33         | 3' OLE probe                               | TTCGTGATCAAAGAAGGGAATT                      |
| OLE34         | 5' ispA probe                              | TAATACGACTCACTATAGGCTAATGGTTACGATTCACGAC    |
| OLE35         | 3' ispA probe                              | ATGAGTGTACAACGTTACAATTTT                    |
| OLE36         | 5' 4.5S RNA probe                          | TAATACGACTCACTATAGGGTGGGGGCCCTGCCAGCT       |
| OLE37         | 3' 4.5S RNA probe                          | GGGGGCTCTGTTGGTTCTCCCGC                     |
